# Supplementary material for: Temperature seasonality in the North American continental interior during the early Eocene climatic optimum
Source: Copernicus journal article supplement (doi:10.5194/cp-2018-28), 2018-03-28
Supplement: Supplementary file 1 [file cp-2018-28-supplement-version1.pdf › cp_supplement/cp-2018-28-supplement-version1.pdf]

Table A.1. Paleosol geochemistry data

| Sample | Soil type | Horizon | Height (m) | wt%                            |      |                               |                  |                  |                  |                                |       |                   |      |                  | MAT (°C)* |
|--------|-----------|---------|------------|--------------------------------|------|-------------------------------|------------------|------------------|------------------|--------------------------------|-------|-------------------|------|------------------|-----------|
|        |           |         |            | Fe <sub>2</sub> O <sub>3</sub> | MnO  | P <sub>2</sub> O <sub>5</sub> | SiO <sub>2</sub> | TiO <sub>2</sub> | ZrO <sub>2</sub> | Al <sub>2</sub> O <sub>3</sub> | CaO   | Na <sub>2</sub> O | MgO  | K <sub>2</sub> O |           |
| HB-99  | Alfisol   | Bt      | 6          | 4.17                           | 0.35 | 0.19                          | 51.56            | 0.60             | 0.02             | 11.60                          | 10.20 | 2.02              | 2.00 | 2.16             | 14.9      |
| HB-113 | Alfisol   | Bt      | 18         | 5.67                           | 0.15 | 0.26                          | 50.00            | 0.63             | 0.05             | 13.45                          | 6.78  | 1.53              | 2.58 | 2.69             | 15.0      |
| HB-13  | Alfisol   | Bt      | 24.5       | 1.75                           | 0.14 | 0.14                          | 62.07            | 0.45             | 0.03             | 8.70                           | 11.18 | 1.61              | 1.04 | 1.74             | 17.1      |
| HB-133 | Alfisol   | Bt      | 41         | 2.55                           | 0.03 | 0.08                          | 60.38            | 0.57             | 0.04             | 14.69                          | 5.61  | 2.15              | 2.34 | 2.96             | 14.3      |
| HB-55  | Alfisol   | Bt      | 66.5       | 5.44                           | 0.17 | 0.17                          | 51.00            | 0.63             | 0.02             | 13.24                          | 6.88  | 1.71              | 2.71 | 2.36             | 13.5      |
| HB-59  | Alfisol   | Bt      | 72.5       | 6.27                           | 0.12 | 0.29                          | 49.22            | 0.65             | 0.02             | 14.59                          | 7.28  | 1.22              | 2.65 | 2.46             | 13.7      |
| HB-70  | Alfisol   | Bt      | 83         | 4.53                           | 0.15 | 0.16                          | 55.20            | 0.52             | 0.03             | 10.83                          | 8.15  | 1.86              | 2.10 | 2.19             | 16.3      |
| HB-78  | Alfisol   | Bt      | 93         | 3.13                           | 0.29 | 0.38                          | 49.18            | 0.37             | 0.02             | 9.43                           | 13.78 | 1.64              | 1.90 | 2.01             | 17.6      |
| HB-86  | Alfisol   | Bt      | 99         | 5.24                           | 0.13 | 0.11                          | 51.00            | 0.56             | 0.04             | 11.85                          | 6.37  | 1.77              | 4.23 | 2.53             | 14.9      |
| HB-182 | Alfisol   | Bt      | 107        | 6.62                           | 0.11 | 0.15                          | 50.57            | 0.62             | 0.03             | 14.00                          | 5.08  | 2.04              | 2.38 | 2.53             | 14.2      |

\* MAT presented is “high” estimates from PPM<sub>1.0</sub> as described in Stinchcomb et al. (2016) and *Section 4.1*.

Table B.1. Clumped isotope data

| Sample | Height (m) | $\delta^{13}\text{C}$ (‰)* | $\delta^{18}\text{O}$ (‰)* | $\Delta_{47}$ (‰) | S.E. (‰) | $\Delta_{48}$ (‰) | Ave. $\Delta_{47}$ (‰) <sup>§</sup> | T (°C) | $\delta^{18}\text{O}_{\text{ssw}}$ (‰) <sup>†</sup> |
|--------|------------|----------------------------|----------------------------|-------------------|----------|-------------------|-------------------------------------|--------|-----------------------------------------------------|
| HB-109 | 5          | -9.81                      | -10.95                     | 0.627             | 0.010    | 0.45              | 0.628 ± 0.001                       | 19 ± 3 | -9.6                                                |
|        |            | -9.69                      | -10.84                     | 0.629             | 0.009    | -0.01             |                                     |        |                                                     |
|        |            | -9.54                      | -10.64                     | 0.627             | 0.006    | 0.41              |                                     |        |                                                     |
| HB-18  | 25         | -6.36                      | -5.33                      | 0.630             | 0.011    | 0.58              | 0.627 ± 0.001                       | 19 ± 3 | -3.9                                                |
|        |            | -6.59                      | -5.35                      | 0.625             | 0.009    | 0.24              |                                     |        |                                                     |
|        |            | -6.57                      | -5.22                      | 0.627             | 0.009    | 0.02              |                                     |        |                                                     |
| HB-128 | 35         | -5.54                      | -5.03                      | 0.608             | 0.010    | 0.52              | 0.594 ± 0.010                       | 29 ± 3 | -1.4                                                |
|        |            | -5.53                      | -4.93                      | 0.606             | 0.008    | 0.01              |                                     |        |                                                     |
|        |            | -5.51                      | -4.91                      | 0.570             | 0.009    | 0.24              |                                     |        |                                                     |
| HB-129 | 45         | -6.20                      | -4.72                      | 0.624             | 0.009    | 0.56              | 0.611 ± 0.009                       | 24 ± 3 | -2.2                                                |
|        |            | -6.22                      | -4.72                      | 0.599             | 0.009    | 0.39              |                                     |        |                                                     |
| HB-30  | 50         | -5.90                      | -5.23                      | 0.583             | 0.010    | 0.30              | 0.582 ± 0.001                       | 34 ± 3 | -0.9                                                |
|        |            | -5.90                      | -5.21                      | 0.581             | 0.010    | 0.27              |                                     |        |                                                     |
| D-20   | 60         | -6.34                      | -4.72                      | 0.603             | 0.009    | 0.28              | 0.591 ± 0.008                       | 31 ± 3 | -0.9                                                |
|        |            | -6.34                      | -4.76                      | 0.570             | 0.007    | 0.22              |                                     |        |                                                     |
|        |            | -6.15                      | -4.60                      | 0.600             | 0.008    | 0.32              |                                     |        |                                                     |
| HB-47  | 65         | -5.83                      | -5.02                      | 0.594             | 0.010    | 0.33              | 0.607 ± 0.014                       | 25 ± 4 | -2.2                                                |
|        |            | -5.83                      | -5.03                      | 0.633             | 0.009    | 0.85              |                                     |        |                                                     |
|        |            | -5.65                      | -4.91                      | 0.634             | 0.010    | 0.26              |                                     |        |                                                     |
|        |            | -5.78                      | -4.83                      | 0.566             | 0.007    | 0.04              |                                     |        |                                                     |
| HB-162 | 80         | -8.23                      | -7.43                      | 0.603             | 0.008    | 0.44              | 0.605 ± 0.015                       | 26 ± 4 | -4.7                                                |
|        |            | -8.26                      | -7.48                      | 0.638             | 0.009    | -0.02             |                                     |        |                                                     |
|        |            | -8.29                      | -7.46                      | 0.575             | 0.010    | 0.32              |                                     |        |                                                     |
| HB-81  | 95         | -7.46                      | -11.83                     | 0.578             | 0.010    | 0.15              | 0.613 ± 0.011                       | 23 ± 3 | -9.6                                                |
|        |            | -7.48                      | -11.82                     | 0.609             | 0.008    | 0.44              |                                     |        |                                                     |
|        |            | -7.37                      | -11.78                     | 0.631             | 0.009    | 0.17              |                                     |        |                                                     |
|        |            | -7.44                      | -11.65                     | 0.634             | 0.009    | 0.19              |                                     |        |                                                     |
| HB-187 | 115        | -6.91                      | -7.95                      | 0.612             | 0.010    | 0.74              | 0.609 ± 0.011                       | 25 ± 3 | -5.4                                                |
|        |            | -6.81                      | -7.94                      | 0.631             | 0.008    | 0.04              |                                     |        |                                                     |
|        |            | -6.89                      | -7.88                      | 0.585             | 0.008    | 0.20              |                                     |        |                                                     |
| 129-A  |            | -5.60                      | -5.14                      | 0.629             | 0.009    | 0.13              | 0.621 ± 0.005                       | 21 ± 3 | -3.4                                                |
|        |            | -5.59                      | -5.25                      | 0.626             | 0.009    | 0.01              |                                     |        |                                                     |
|        |            | -5.67                      | -5.24                      | 0.609             | 0.009    | 0.03              |                                     |        |                                                     |
| 129-B  |            | -5.59                      | -4.84                      | 0.620             | 0.008    | -0.11             | 0.618 ± 0.001                       | 22 ± 3 | -2.8                                                |
|        |            | -5.62                      | -4.88                      | 0.617             | 0.009    | -0.02             |                                     |        |                                                     |
| 187-A  |            | -6.81                      | -8.91                      | 0.647             | 0.008    | 0.00              | 0.631 ± 0.009                       | 18 ± 3 | -7.8                                                |
|        |            | -6.79                      | -8.93                      | 0.609             | 0.007    | -0.07             |                                     |        |                                                     |
|        |            | -6.83                      | -8.78                      | 0.636             | 0.010    | 0.15              |                                     |        |                                                     |
| 187-B  |            | -6.71                      | -8.83                      | 0.619             | 0.007    | -0.10             | 0.624 ± 0.003                       | 20 ± 3 | -7.1                                                |
|        |            | -6.72                      | -8.59                      | 0.629             | 0.008    | 0.09              |                                     |        |                                                     |

| Standards | # runs | $\delta^{13}\text{C}$ (‰)* <sup>‡</sup> | $\delta^{18}\text{O}$ (‰)* <sup>‡</sup> | $\Delta_{47}$ (‰) <sup>‡</sup> | S.D. (‰) | S.E. (‰) | ARF statistics reported in Table B.2<br>for 3 different analysis periods:<br><i>January - February 2015</i><br><i>March - April 2015</i><br><i>March 2017</i> |
|-----------|--------|-----------------------------------------|-----------------------------------------|--------------------------------|----------|----------|---------------------------------------------------------------------------------------------------------------------------------------------------------------|
| ETH-2     | 15     | -10.16                                  | -18.78                                  | 0.213                          | 0.029    | 0.007    |                                                                                                                                                               |
| NBS-19    | 9      | 2.04                                    | -2.16                                   | 0.340                          | 0.023    | 0.008    |                                                                                                                                                               |
| C64       | 175    | -2.05                                   | -15.69                                  | 0.546                          | 0.026    | 0.002    |                                                                                                                                                               |
| COR       | 105    | -2.22                                   | -4.50                                   | 0.643                          | 0.026    | 0.003    |                                                                                                                                                               |

\* Measured versus Vienna Pee Dee Belemnite (VPDB).

† Calculated soil source water (ssw) composition versus Vienna standard mean ocean water (VSMOW), based on fractionation factor of Kim and O'Neil (1997).

§ Average of  $\Delta_{47}$  measurements with no acid fractionation correction applied (e.g., Kelson et al., 2017).

‡ Values represent average for standard analyses during combined sample analysis periods (January 2015 - March 2017).

T<sub>1</sub> Temperatures calculated using inorganic calcite calibration of Kelson et al. (2017), including uncertainty (analytical S.E.) for each sample except where lower than long term S.E. of standards (0.01; ±2°C).

Table C.1. Floral lists and nearest living relative data

|                                    | Floral group                    | Updated affinity            | Nearest living relative       | Source                        |
|------------------------------------|---------------------------------|-----------------------------|-------------------------------|-------------------------------|
| LATHAM                             | <i>Meliosma longifolia</i>      | <i>Dyrana flexuosa</i>      | Platanaceae                   | 1,9                           |
|                                    | <i>Cnemidaria magna</i>         |                             | <i>Cnemidaria grandifolia</i> | 1                             |
|                                    | <i>Platycarya americana</i>     |                             | <i>Platycarya strobilacea</i> | 1                             |
|                                    | <i>Salvinia preauriculata</i>   |                             | <i>Salvinia auriculata</i>    | 1,3                           |
|                                    | <i>Lygodium kaulfussi</i>       |                             | <i>Lygodium palmatum</i>      | 1,4                           |
|                                    | <i>Sabalites</i> sp.            |                             | Arecaceae                     | 1                             |
|                                    | <i>Zingiberopsis isonervosa</i> |                             | Zingiberaceae                 | 1,5                           |
|                                    | <i>Apocynaceae</i> sp.          |                             | Apocynaceae                   | 1,2                           |
|                                    | <i>Alnus</i> sp.                |                             | <i>Alnus</i> sp.              | 1,2                           |
|                                    | <i>Stillingia casca</i>         |                             | <i>Stillingia</i> sp.         | 1,5                           |
|                                    | <i>Lauraceae</i> sp.            |                             | Lauraceae                     | 1                             |
|                                    | <i>Dombeya novi-mundi</i>       | Malvaceae                   | Malvaceae                     | 1,5                           |
|                                    | <i>Averrhoites affinis</i>      |                             | Oxalidaceae                   | 1,5                           |
|                                    | <i>Populus wyomingiana</i>      |                             | <i>Populus</i> sp.            | 1,3,6                         |
|                                    | SOURDOUGH                       | <i>Platycarya americana</i> |                               | <i>Platycarya strobilacea</i> |
| <i>Alnus</i> sp.                   |                                 |                             | <i>Alnus</i> sp.              | 1,2                           |
| <i>Apocynaceae</i> sp.             |                                 |                             | Apocynaceae                   | 1,2                           |
| <i>Lauraceae</i> sp.               |                                 |                             | Lauraceae                     | 1                             |
| <i>Hovenia oregonensis</i>         |                                 |                             | <i>Hovenia</i> sp.            | 1,7                           |
| <i>Dombeya novi-mundi</i>          |                                 | Malvaceae                   | Malvaceae                     | 1,5                           |
| <i>Populus wyomingiana</i>         |                                 |                             | <i>Populus</i> sp.            | 1,3,6                         |
| <i>Allophylus flexifolia</i>       |                                 |                             | <i>Allophylus racemosus</i>   | 1                             |
| <i>Cinnamomophyllum</i> sp.        |                                 | Lauraceae                   | Lauraceae                     | 1,9                           |
| <i>Equisetum</i> sp.               |                                 |                             | <i>Equisetum</i> sp.          | 1                             |
| <i>Woodwardia gravida</i>          |                                 |                             | <i>Woodwardia fimbriata</i>   | 1,5                           |
| <i>Cnemidaria magna</i>            |                                 |                             | <i>Cnemidaria grandifolia</i> | 1,5                           |
| <i>Allantodiopsis erosa</i>        |                                 |                             | Polypodiaceae                 | 1,2                           |
| <i>Salvinia preauriculata</i>      |                                 |                             | <i>Salvinia auriculata</i>    | 1,3                           |
| <i>Lygodium kaulfussi</i>          |                                 |                             | <i>Lygodium palmatum</i>      | 1,4                           |
| <i>Thelypteris iddingsi</i>        |                                 |                             | <i>Thelypteris kunthii</i>    | 1,6                           |
| <i>Glyptostrobus europaeus</i>     |                                 |                             | <i>Glyptostrobus pensilis</i> | 1,4                           |
| <i>Philodendron</i> sp.            |                                 |                             | <i>Philodendron</i> sp.       | 1                             |
| <i>Sabalites</i> sp.               |                                 |                             | Arecaceae                     | 1                             |
| <i>Zingiberopsis isonervosa</i>    |                                 |                             | Zingiberaceae                 | 1,5                           |
| <i>Sparganium stygium</i>          |                                 | <i>Platananthus</i> sp.     | Platanaceae                   | 1,4,9                         |
| <i>Dendropanax latens</i>          |                                 |                             | <i>Dendropanax</i> sp.        | 1,6                           |
| <i>Elaeocarpus sloanea</i>         |                                 |                             | <i>Elaeocarpus</i> sp.        | 1,2                           |
| <i>Stillingia casca</i>            |                                 |                             | <i>Stillingia</i> sp.         | 1,5                           |
| <i>Fagaceae</i> sp.                |                                 |                             | Fagaceae                      | 1                             |
| <i>Magnoliaceae</i> sp.            |                                 |                             | Magnoliaceae                  | 1                             |
| <i>Palaeosinomenium venablesii</i> |                                 |                             | Menispermaceae                | 1,7                           |
| <i>Atriaecarpum clarnense</i>      |                                 |                             | Menispermaceae                | 1,7                           |
| <i>Syzygioides americana</i>       |                                 |                             | <i>Syzygium</i> sp.           | 1,2,7                         |
| <i>Nymphaeaceae</i> sp.            |                                 |                             | Nymphaeaceae                  | 1                             |
| <i>Schoepfia republicensis</i>     |                                 |                             | <i>Schoepfia</i> sp.          | 1,8                           |
| <i>Macginitiea gracilis</i>        |                                 |                             | <i>Platanus</i> sp.           | 1,8                           |
| <i>Chaetoptelea microphylla</i>    |                                 | <i>Ulmites microphylla</i>  | <i>Ulmus</i> sp.              | 1,3,9                         |
| <i>Averrhoites affinis</i>         |                                 |                             | Oxalidaceae                   | 1,5                           |

Sources  
<sup>1</sup> Wilf (1998, 2000)  
<sup>2</sup> Wing (1998)  
<sup>3</sup> Berry (1916)  
<sup>4</sup> Heer (1859)  
<sup>5</sup> Hickey (1977, 1980)  
<sup>6</sup> MacGinitie (1969)  
<sup>7</sup> Manchester and Dilcher (1982)  
<sup>8</sup> Wolfe and Wehr (1987)  
<sup>9</sup> Manchester (2014)

Table C.1. (cont'd)

|                 | Floral group                             | Updated affinity | Nearest living relative          | Source |
|-----------------|------------------------------------------|------------------|----------------------------------|--------|
| NILAND TONGUE   | <i>Platycarya castaneopsis</i>           | Malvaceae        | <i>Platycarya</i> sp.            | 1,2    |
|                 | <i>Dombeya novi-mundi</i>                |                  | Malvaceae                        | 1,5    |
|                 | <i>Averrhoites affinis</i>               |                  | Oxalidaceae                      | 1,5    |
|                 | <i>Equisetum</i> sp.                     |                  | <i>Equisetum giganteum</i>       | 1      |
|                 | <i>Acrostichum hesperium</i>             |                  | <i>Acrostichum aureum</i>        | 1,6    |
|                 | <i>Salvinia preauriculata</i>            |                  | <i>Salvinia auriculata</i>       | 1,3    |
|                 | <i>Lygodium kaulfussi</i>                |                  | <i>Lygodium palmatum</i>         | 1,4,6  |
|                 | <i>Thelypteris iddingsi</i>              |                  | <i>Thelypteris kunthii</i>       | 1,6    |
|                 | <i>Cycadaceae</i> sp.                    |                  | Cycadaceae                       | 1      |
|                 | <i>Sabalites</i> sp.                     |                  | Arecaceae                        | 1      |
|                 | <i>Zingiberopsis isonervosa</i>          |                  | Zingiberaceae                    | 1,5    |
|                 | <i>Dendropanax latens</i>                |                  | <i>Dendropanax</i> sp.           | 1,6    |
|                 | <i>Alnus</i> sp.                         |                  | <i>Alnus</i> sp.                 | 1,2    |
|                 | <i>Leguminosae gleditsia</i>             |                  | <i>Dalbergia hupeana</i>         | 1      |
|                 | <i>Anamirta milleri</i>                  |                  | <i>Anamirta cocculus</i>         | 1,8    |
|                 | <i>Schoepfia republicensis</i>           |                  | <i>Schoepfia</i> sp.             | 1,8    |
|                 | <i>Proteaciphyllum minutum</i>           |                  | Proteaceae                       | 1,6    |
|                 | <i>Populus wyomingiana</i>               |                  | <i>Populus</i> sp.               | 1,3,6  |
| LITTLE MOUNTAIN | <i>Parvileguminophyllum coloradensis</i> | Cyclocarya sp.   | Fabaceae                         | 1      |
|                 | <i>Lindera varifolia</i>                 |                  | <i>Lindera obtusifolia</i>       | 1,6    |
|                 | <i>Rhus nigricans</i>                    |                  | <i>Rhus typhina</i>              | 1,6    |
|                 | <i>Equisetum</i> sp.                     |                  | <i>Equisetum giganteum</i>       | 1      |
|                 | <i>Allantodiopsis erosa</i>              |                  | Polypodiaceae                    | 1,2    |
|                 | <i>Acrostichum hesperium</i>             |                  | <i>Acrostichum aureum</i>        | 1,6    |
|                 | <i>Pinus</i> sp.                         |                  | <i>Pinus</i> sp.                 | 1      |
|                 | <i>Pinus florissanti</i>                 |                  | <i>Pinus ponderosa</i>           | 1      |
|                 | <i>Taxodiaceae</i> sp.                   |                  | Taxodiaceae                      | 1      |
|                 | <i>Sabalites</i> sp.                     |                  | Arecaceae                        | 1      |
|                 | <i>Smilacaceae smilax</i>                |                  | <i>Smilax herbacea</i>           | 1      |
|                 | <i>Acer</i> sp.                          |                  | <i>Acer</i> sp.                  | 1      |
|                 | <i>Dipteronia</i> sp.                    |                  | <i>Dipteronia</i> sp.            | 1      |
|                 | <i>Alnus</i> sp.                         |                  | <i>Alnus</i> sp.                 | 1,2    |
|                 | <i>Bignoniaceae</i> sp.                  |                  | Bignoniaceae                     | 1      |
|                 | <i>Calycites ardtunensis</i>             |                  | Asteraceae                       | 1      |
|                 | <i>Ceratophyllum muricatum</i>           |                  | <i>Ceratophyllum muricatum</i>   | 1,3    |
|                 | <i>Elaeocarpus sloanea</i>               |                  | <i>Elaeocarpus</i> sp.           | 1,2    |
|                 | <i>Euphorbiaceae alchloanea</i>          |                  | <i>Alchloanea</i> sp.            | 1      |
|                 | <i>Quercus</i> sp.                       |                  | <i>Quercus polymorpha</i>        | 1,5    |
|                 | <i>Acer lesquereuxi</i>                  |                  | <i>Acer pictum</i>               | 1      |
|                 | <i>Hydrangea</i> sp.                     |                  | <i>Hydrangea</i> sp.             | 1      |
|                 | <i>Palaeocarya clarnensis</i>            |                  | Juglandaceae                     | 1,7    |
|                 | <i>Pterocarya macginittii</i>            |                  | Juglandaceae                     | 1,7,9  |
|                 | <i>Juglandaceae</i> sp.                  |                  | Juglandaceae                     | 1      |
|                 | <i>Caesalpinia flumen-iridensis</i>      |                  | <i>Caesalpinia</i> sp.           | 1      |
|                 | <i>Cladrastris</i> sp.                   |                  | <i>Cladrastris kentukea</i>      | 1      |
|                 | <i>Gymnocladus hesperia</i>              |                  | <i>Gymnocladus dioicus</i>       | 1,6    |
|                 | <i>Leguminosites lesquereuxiana</i>      |                  | <i>Dalbergia hupeana</i>         | 1      |
|                 | <i>Triumfetta ovata</i>                  |                  | <i>Triumfetta</i> sp.            | 1,6    |
|                 | <i>Menispermaceae abuta</i>              |                  | Menispermaceae                   | 1      |
|                 | <i>Syzygioides americana</i>             |                  | <i>Syzygium</i> sp.              | 1,7    |
|                 | <i>Macginitiea wyomingensis</i>          |                  | <i>Platanus</i> sp.              | 1,7    |
|                 | <i>Platanus raynoldsii</i>               |                  | <i>Platanus</i> sp.              | 1,9    |
|                 | <i>Proteaciphyllum minutum</i>           |                  | Proteaceae                       | 1,6    |
|                 | <i>Populus cinnamomoides</i>             |                  | <i>Populus angustifolia</i>      | 1,6    |
|                 | <i>Allophylus flexifolia</i>             |                  | <i>Allophylus racemosus</i>      | 1,6    |
|                 | <i>Cardiospermum coloradensis</i>        |                  | <i>Cardiospermum microcarpum</i> | 1,6    |
|                 | <i>Koelreuteria viridifluminis</i>       |                  | Rutaceae                         | 1,9    |
|                 | <i>Sapindales</i> sp.                    |                  | <i>Sapindales</i> sp.            | 1      |
|                 | <i>Ailanthus lesquereuxi</i>             |                  | <i>Ailanthus altissima</i>       | 1      |
|                 | <i>Cedrelospermum nervosum</i>           |                  | <i>Ulmus</i> sp.                 | 1,7    |
|                 | <i>Astronium truncatum</i>               |                  | <i>Astronium graveolens</i>      | 1,6    |
|                 | <i>Averrhoites affinis</i>               |                  | Oxalidaceae                      | 1,3,5  |
|                 | <i>Fraxinus</i> sp.                      |                  | <i>Fraxinus</i> sp.              | 1      |

Table C.2. Climatic envelopes for modern plant taxa

| Taxa*                | MAT (°C) <sup>†</sup> | σ   | WMT (°C) <sup>†</sup> | σ   | CMT (°C) <sup>†</sup> | σ   |
|----------------------|-----------------------|-----|-----------------------|-----|-----------------------|-----|
| <i>Acer</i>          | 9.0                   | 2.5 | 22.2                  | 3.2 | -2.3                  | 4.0 |
| <i>Acrostichum</i>   | 24.8                  | 2.6 | 31.8                  | 2.5 | 17.0                  | 4.1 |
| <i>Ailanthus</i>     | 17.8                  | 4.5 | 29.7                  | 3.4 | 4.7                   | 7.7 |
| <i>Alchloanea</i>    | 21.7                  | 3.7 | 29.8                  | 3.4 | 13.0                  | 5.7 |
| <i>Allophyllus</i>   | 23.4                  | 3.6 | 31.0                  | 3.6 | 15.3                  | 4.8 |
| <i>Alnus</i>         | 8.4                   | 2.6 | 21.0                  | 2.7 | -2.1                  | 3.9 |
| Apocynaceae          | 8.5                   | 4.5 | 27.6                  | 3.9 | -9.0                  | 7.1 |
| Arecaceae            | 22.3                  | 4.5 | 30.7                  | 3.8 | 13.6                  | 6.1 |
| <i>Astronium</i>     | 24.3                  | 2.4 | 31.8                  | 2.3 | 16.2                  | 3.7 |
| Bignoniaceae         | 21.2                  | 4.6 | 30.6                  | 3.9 | 11.3                  | 7.0 |
| <i>Caesalpinia</i>   | 23.1                  | 3.7 | 31.7                  | 3.5 | 13.9                  | 5.6 |
| <i>Cardiospermum</i> | 22.5                  | 3.5 | 31.7                  | 3.4 | 12.3                  | 5.6 |
| <i>Ceratophyllum</i> | 9.8                   | 3.1 | 22.6                  | 3.1 | -1.1                  | 4.0 |
| <i>Cladastris</i>    | 15.0                  | 5.0 | 29.6                  | 3.4 | 0.0                   | 7.8 |
| <i>Cnemidaria</i>    | 22.3                  | 3.3 | 28.7                  | 3.5 | 16.1                  | 3.5 |
| Cycadaceae           | 25.3                  | 2.8 | 33.5                  | 2.6 | 15.2                  | 4.3 |
| <i>Dalbergia</i>     | 23.2                  | 3.5 | 31.4                  | 3.1 | 14.4                  | 5.6 |
| <i>Dendropanax</i>   | 21.4                  | 4.0 | 29.5                  | 3.9 | 13.0                  | 5.7 |
| <i>Dipteronia</i>    | 13.3                  | 3.1 | 28.3                  | 2.9 | -2.7                  | 5.3 |
| Malvaceae            | 20.7                  | 3.4 | 29.6                  | 3.6 | 10.2                  | 5.1 |
| <i>Elaeocarpus</i>   | 16.7                  | 5.3 | 26.0                  | 4.4 | 6.8                   | 6.2 |
| <i>Equisetum</i>     | 7.7                   | 3.5 | 20.6                  | 3.3 | -3.4                  | 5.3 |
| <i>Fraxinus</i>      | 9.2                   | 2.0 | 21.5                  | 3.1 | -0.9                  | 3.0 |
| <i>Glyptostrobus</i> | 20.4                  | 2.2 | 31.9                  | 1.7 | 8.0                   | 4.2 |
| <i>Gymnocladus</i>   | 12.8                  | 3.0 | 31.5                  | 2.1 | -6.1                  | 4.5 |
| <i>Hovenia</i>       | 15.7                  | 3.0 | 30.4                  | 2.4 | 0.7                   | 4.1 |
| <i>Hydrangea</i>     | 14.6                  | 4.8 | 26.9                  | 4.4 | 2.1                   | 8.0 |
| Juglandaceae         | 12.3                  | 4.1 | 26.8                  | 3.8 | -0.7                  | 6.0 |
| Lauraceae            | 18.8                  | 4.6 | 28.3                  | 3.8 | 8.8                   | 6.4 |
| <i>Lindera</i>       | 15.0                  | 4.6 | 28.8                  | 3.4 | 0.8                   | 7.3 |
| <i>Lygodium</i>      | 22.8                  | 4.4 | 31.5                  | 3.1 | 13.5                  | 7.2 |
| Magnoliaceae         | 16.5                  | 5.2 | 28.7                  | 3.7 | 3.7                   | 9.2 |
| Menispermaceae       | 21.2                  | 4.8 | 30.5                  | 3.9 | 10.8                  | 7.3 |
| <i>Nymphaea</i>      | 10.4                  | 5.9 | 22.5                  | 4.8 | -0.2                  | 7.0 |
| <i>Philodendron</i>  | 22.9                  | 3.6 | 29.8                  | 3.4 | 16.1                  | 4.9 |
| <i>Pinus</i>         | 9.4                   | 4.0 | 23.4                  | 4.4 | -2.2                  | 5.2 |
| <i>Platanus</i>      | 13.5                  | 3.7 | 28.9                  | 3.5 | -0.4                  | 6.0 |
| <i>Platycarya</i>    | 16.1                  | 3.1 | 28.9                  | 4.4 | 2.7                   | 4.1 |
| Polypodiaceae        | 11.7                  | 5.8 | 22.9                  | 4.5 | 1.7                   | 7.3 |
| <i>Populus</i>       | 8.1                   | 3.0 | 21.8                  | 3.3 | -3.4                  | 4.4 |
| Proteaceae           | 18.0                  | 4.8 | 29.8                  | 4.9 | 6.5                   | 4.8 |
| <i>Quercus</i>       | 11.2                  | 3.2 | 25.2                  | 5.0 | 0.1                   | 3.3 |
| <i>Rhus</i>          | 14.1                  | 4.4 | 29.8                  | 3.5 | -0.6                  | 7.2 |
| Rutaceae             | 17.9                  | 4.5 | 29.3                  | 4.1 | 6.9                   | 5.9 |
| <i>Salvinia</i>      | 21.6                  | 5.7 | 31.7                  | 2.7 | 11.4                  | 9.6 |
| <i>Schoepfia</i>     | 21.6                  | 3.7 | 30.5                  | 3.5 | 12.2                  | 6.2 |
| <i>Smilax</i>        | 17.2                  | 4.6 | 28.5                  | 3.7 | 6.1                   | 6.4 |
| <i>Stillingia</i>    | 19.1                  | 3.0 | 33.8                  | 5.2 | 5.6                   | 5.1 |
| <i>Syzygium</i>      | 21.2                  | 4.6 | 29.7                  | 4.1 | 11.5                  | 6.0 |
| Taxodiaceae          | 15.1                  | 4.5 | 28.1                  | 5.2 | 2.6                   | 4.6 |
| Thelypteridaceae     | 10.0                  | 6.8 | 22.5                  | 5.2 | -1.3                  | 8.7 |
| <i>Triumfetta</i>    | 23.7                  | 3.7 | 32.8                  | 4.4 | 13.1                  | 4.9 |
| <i>Ulmus</i>         | 8.9                   | 2.5 | 21.4                  | 3.2 | -1.4                  | 3.3 |
| <i>Woodwardia</i>    | 14.6                  | 4.0 | 28.1                  | 3.9 | 1.6                   | 6.3 |
| Zingiberaceae        | 21.5                  | 4.5 | 29.5                  | 3.6 | 12.9                  | 7.1 |

\* Analyzed modern taxa represent nearest living relative of fossil taxa from studied sites (summarized in Table C.1).

† Mean values and standard deviations derived from modern global distributions (GBIF, 2016) cross-plotted with high-resolution climatic maps (Hijmans et al., 2005).

Table C.3. Mean annual temperature comparison from floral sites

|                 |              | Physiognometric Methods |             |             | NLR Method  |
|-----------------|--------------|-------------------------|-------------|-------------|-------------|
| Site            | # of species | P                       | MAT1        | MAT2        | MAT3        |
| Latham          | 19           | 0.500                   | 16.4 (±3.9) | 14.8 (±4.8) | 16.0 (±1.5) |
| Sourdough       | 74           | 0.659                   | 21.3 (±2.3) | 18.0 (±4.8) | 16.4 (±1.8) |
| Niland Tongue   | 24           | 0.714                   | 23.0 (±3.1) | 19.2 (±4.8) | 18.2 (±2.1) |
| Little Mountain | 87           | 0.602                   | 19.6 (±2.3) | 16.9 (±4.8) | 15.2 (±1.5) |

MAT1 = Mean annual temperature estimates from Wilf (2000), error estimates based on Miller et al. (2006)  
MAT2 = Mean annual temperature estimates based on revised Peppe et al. (2011) equation  
MAT3 = Mean annual temperature estimates from this work (Fig. 3), with error estimates calculated as 2σ

Table D.1. Modern climate data and future/Eocene model outputs

|                  | Jan. | Feb. | Mar. | Apr. | May  | Jun. | Jul. | Aug. | Sep. | Oct. | Nov. | Dec. | MART1 | MART2 | MART3 |
|------------------|------|------|------|------|------|------|------|------|------|------|------|------|-------|-------|-------|
| Modern*          | -8.4 | -6.9 | -1.0 | 4.1  | 9.1  | 14.1 | 18.1 | 17.1 | 11.8 | 5.4  | -2.2 | -8.0 | 26.5  | 27.4  | 25.6  |
| RCP4.5 ensemble† | -5.0 | -3.3 | 1.6  | 6.4  | 12.2 | 16.5 | 20.4 | 19.9 | 14.4 | 7.3  | -0.1 | -4.6 | 25.4  | 26.6  | 24.2  |
| RCP8.5 ensemble† | -2.9 | -0.4 | 5.4  | 9.8  | 15.1 | 20.8 | 24.7 | 23.2 | 18.8 | 10.5 | 3.4  | -1.8 | 27.6  | 28.2  | 27.0  |
| Eocene LoCO§     | 4    | 6    | 8    | 13   | 15   | 20   | 24   | 23   | 18   | 11   | 8    | 5    | 20    | 22    | 18    |
| Eocene HiCO§     | 6    | 8    | 11   | 15   | 18   | 26   | 30   | 27   | 20   | 13   | 10   | 7    | 24    | 28    | 20    |

\* Average observed mean monthly temperature from NOAA 1981-2010 Climate Normals for stations in the GRB (n= 18; NCDC, 2010).

† Regional monthly mean temperature for downscaled area of GRB (40.5-43°N, 107-110.5°W) from 10-model ensemble (CMIP5) for future emissions scenarios (NCDMI, 2014).

§ Regional monthly mean temperature for area of GRB from RegCM3 configurations for low CO<sub>2</sub> (560 ppm) and high CO<sub>2</sub> (2240 ppm) scenarios (e.g., Thrasher and Sloan, 2009).

MART1 = WMMT-CMMT; MART2 = (WMMT-MAT)\*2; MART3 = (MAT-CMMT)\*2
