# Supplementary material for: Temperature seasonality in the North American continental interior during the early Eocene climatic optimum
Source: Copernicus journal article supplement (doi:10.5194/cp-2018-28), 2018-03-28
Supplement: Supplementary file 1 [file TableB2clumpedfull.xlsx]

## Sheet: ARF_Reduced_RF_201410-201504_Br
pollycompile.m - 170115 reduced filename: 20170118T054616_ARF_Reduced.txt
Created from log file: ClumpedSampleLog_RF_201410-201504_Brand.txt
Reference Materials:
	Accepted Values
	Name	d13C VPDB (permil)	d18O VPDB (permil)	D47 ARF (permil)	notes
	NBS19	1.95	-2.2	0.392	d13C and d18O as per CIAAW, D47 from Dennis et al. 2011
	C64	-2.05	-15.54	0.621	d13Cacc and d18Oacc from kiel_refmat_nist on 150223, D47 is from C64_Summary.xlsx on 150130
	Coral	-2.14	-4.5	0.718	d13Cacc and d18Oacc from kiel_refmat_nist on 150223, D47 is from C64_Summary.xlsx on 150130
	Polly CO2 Reference Gas	-10.3	-6.44	0.9
Absolute Reference Frame (ARF)
	Temperature (*C)	n	Slope	Intercept (D47 [EGvsWG]0)	r2	ETF slope	ETF intercept	ETF r2	ARF slope bootstrapped	ARF intercept bootstrapped
	4	16	0.0038154	0.084899	0.93	1.0808	0.93663	0.99934	NaN	NaN
	60	18	0.0038154	-0.14213	0.8627	1.0808	0.93663	0.99934	NaN	NaN
	1000	32	0.0038154	-0.84673	0.8478	1.0808	0.93663	0.99934	NaN	NaN
Acid Correction Factor: 0
(if you want to use an acid fractionation correction use, acid = 0.082 Defliese_ChemGeol_2015)
D47 to Temperature equation: T_D47_ARF_acid = sqrt((4.17*10^4)./(D47_ARF_acid - 0.139)); Kelson et al. 2016 GCA equation 2, no acid correction
A note about VPDB values below - the columns labeled "vs VPDB (via WG)" are vs our working reference CO2 which was calibrated against NBS19.
The columns labeled "vs VPDB (formal)" are also vs the working reference CO2 but also corrected to current reference frame values of NBS19, LSVEC, and NBS18.
Individual Carbonates
	Sample ID	User	Mass (mg)	Acid temperature (C)	Reaction time (minutes)	Pre reaction Gauge 1 (mTorr)	Post reaction Gauge 1 (mTorr)	Mean GC transfer temperature (C)	Transfer time (minutes)	CO2 Pressure Gauge 2 (mbar)	CO2 yield (mbar/mg)	prep notes	labviewscript	Analysis Date	Starting analysis number	Polly Method	Multiport Pressure (mbar)	Bellows Pressure (mbar)	Pressure Adjust difference (mV)	d13C vs VPDB (via WG) (permil)	d13C vs VPDB (formal) (permil)	d13C stdev	d18O vs (via WG) (permil)	d18O vs VPDB (formal) (permil)	d18O stdev	d47 vs VPDB (via WG) (permil)	d47 stdev	D47 ARF acid (permil)	D47 stderr	D47 ARF acid bootstrapped (permil)	D47 BS unc	d48 vs VPDB (via WG) (permil)	d48 stdev	D48 (permil)	D48 stderr	d49 vs VPDB (via WG) (permil)	d49 stdev	D49 (permil)	D49 stderr	n	comments
NBS19
	141116_3_NBS19	ajs	7.995	90.018	600	5.7246	10.6147	-19.4802	1200	58.422	7.3073			"11/16/2014,16:54:02"	37537	130506_Cracker_PBL	118.13	28.41	29.7	2.0406	2.1725	0.0048323	-2.4493	-2.1113	0.0068745	15.7124	0.067474	0.32019	0.0082295	NaN	NaN	8.808	0.32108	0.70517	0.040664	131.853	33.2805	108.935	4.2084	60
	141116_4_NBS19	ajs	8.042	89.9994	600	5.7887	10.2791	-19.096	1200	61.067	7.5935			"11/16/2014,19:06:11"	37544	130506_Cracker_PBL	124.22	29.61	7.8	1.9088	2.039	0.004268	-2.3969	-2.0594	0.0094253	15.6344	0.060182	0.3178	0.0075064	NaN	NaN	8.9162	0.60186	0.70791	0.075553	124.807	50.9197	102.061	6.4394	60
	141214_2_NBS19	andy	7.458	90.1791	600	4.374	12.6447	-19.9399	1200	56.122	7.5251			"12/14/2014,13:55:43"	39039	130506_Cracker_PBL	114.25	29.78	-11.5	1.8702	1.9999	0.0042603	-2.471	-2.2331	0.0080357	15.5755	0.062955	0.37722	0.0080018	NaN	NaN	8.6095	0.35191	0.55244	0.044092	108.566	22.9854	86.3518	2.9069	60
	141216_2_NBS19	andy	5.521	90.0109	600	5.7023	9.5139	-19.0332	1200	41.955	7.5992	high vac 5.0e-7 when bakeout was complete		"12/16/2014,15:17:39"	39195	130506_Cracker_PBL	85.67	22.52	20.3	1.8323	1.9615	0.0043526	-2.3637	-2.1507	0.0063306	15.6076	0.071411	0.33302	0.0089558	NaN	NaN	9.1566	0.4725	0.88032	0.060142	148.158	34.5548	124.953	4.3706	60
	141216_3_NBS19	andy	5.841	90.0543	600	5.3855	8.7302	-19.9904	1200	44.507	7.6198			"12/16/2014,17:29:26"	39202	130506_Cracker_PBL	90.61	23.88	13	1.8304	1.9595	0.0052436	-2.4067	-2.1958	0.0074784	15.5801	0.066113	0.35302	0.0081294	NaN	NaN	8.7709	0.483	0.58375	0.061361	113.237	33.9219	90.8321	4.2906	60
	141216_4_NBS19	andy	5.87	90.0541	600	5.5489	8.6344	-19.994	1200	44.653	7.607			"12/16/2014,19:40:58"	39209	130506_Cracker_PBL	91.14	23.97	5.6	1.8362	1.9654	0.0040275	-2.3549	-2.1461	0.0077576	15.6165	0.064476	0.32861	0.008034	NaN	NaN	9.2032	0.44282	0.90882	0.055931	149.938	24.6469	126.673	3.1164	60
	150205_1_NBS19	andy	9.066	90.2237	600	0.72831	44.389	-20.7034	1200	68.976	7.6082			"2/5/2015,19:34:58"	42852	130506_Cracker_PBL	139.39	34.91	-24.3	1.9334	2.0639	0.0050477	-2.3628	-2.1476	0.0072343	15.6988	0.065587	0.3229	0.0089842	NaN	NaN	9.0312	0.47784	0.75368	0.061909	128.875	28.9141	105.945	3.6584	60
	150208_1_NBS19	egh	8.092	90.5846	600	-4.3729	27.2387	-21.8496	1200	61.192	7.562			"2/9/2015,9:47:31"	43131	130506_Cracker_PBL	124.39	29.1	-7	1.9614	2.0922	0.0045393	-2.3615	-2.1598	0.0074889	15.7301	0.070151	0.32522	0.0093505	NaN	NaN	9.0167	0.41233	0.73641	0.052771	125.588	25.8405	102.691	3.2688	60
	150208_10_NBS19	egh	8.345	90.3039	600	0.6742	8.1509	-21.6996	1200	63.505	7.6099			"2/10/2015,1:30:33"	43194	130506_Cracker_PBL	129.33	30.38	-39.5	1.9595	2.0903	0.0048259	-2.4078	-2.2134	0.0080744	15.7322	0.092526	0.38033	0.012236	NaN	NaN	8.5428	0.58913	0.3592	0.076663	62.3061	40.6679	40.792	5.1455	60
C64
	141010_1_C64	ajs	7.633	90.3367	600	1.5092	31.5171	-19.5925	1200	57.342	7.5124	first carbonate on modified nickel line, datetime is calculated from sample id		"10/10/2014,13:53:25"	35000	130506_Cracker_PBL	116.28	27.65	10.7	-2.0565	-1.9782	0.0046011	-16.2999	-16.0725	0.0074401	-2.4616	0.07096	0.52448	0.0090624	NaN	NaN	-19.0728	0.32269	0.63095	0.041775	66.0257	27.1055	78.4518	3.5395	60
	141010_2_C64	ajs	7.49	90.2296	600	1.8538	9.6724	-19.1276	1200	56.814	7.5853	, datetime is calculated from sample id		"10/10/2014,16:04:43"	35007	130506_Cracker_PBL	114.25	27.22	0.4	-2.056	-1.9777	0.0036935	-16.2674	-16.0392	0.0063607	-2.4347	0.06323	0.51665	0.0082313	NaN	NaN	-19.0643	0.28076	0.57362	0.036882	1.6076	23.3603	13.2114	3.0508	60
	141015_1_C64	kks	8.06	90.0385	600	2.272	20.2262	-20.8134	1200	61.07	7.5769	, datetime is calculated from sample id		"10/17/14,09:33:37"	35446	130506_Cracker_PBL	123.33	29.53	16.6	-2.059	-1.9807	0.0051223	-16.1457	-15.9164	0.0071676	-2.3022	0.06309	0.52702	0.0081992	NaN	NaN	-18.9097	0.37476	0.48404	0.048913	77.2949	30.6469	89.5146	4.0011	60
	141015_6_C64	kks	8.03	90.6068	600	3.258	7.4786	-19.806	1200	60.48	7.5318	, datetime is calculated from sample id		"10/17/2014,18:32:31"	35474	130506_Cracker_PBL	122.28	29.53	-8.3	-2.0741	-1.996	0.0050413	-16.1947	-15.9673	0.0073629	-2.3708	0.065639	0.52348	0.0080995	NaN	NaN	-19.0212	0.39529	0.46992	0.051502	10.4964	33.9699	22.0713	4.4353	60
	141016_1_C64	cps	8.222	90.4504	600	2.3339	56.1675	-20.4146	1200	57.383	6.9792	, datetime is calculated from sample id		"10/17/2014,20:43:50"	35481	130506_Cracker_PBL	115.84	28.24	-7.7	-2.0523	-1.9739	0.0040762	-16.2387	-16.0124	0.0071161	-2.3872	0.07646	0.53202	0.0097454	NaN	NaN	-18.8692	0.42852	0.71431	0.056045	54.715	34.8421	66.8712	4.5492	60
	141020_2_C64	kks	8.05	90.3651	600	2.3763	11.2778	-20.0863	1200	60.25	7.4845	, datetime is calculated from sample id		"10/21/14,09:04:21"	35748	130506_Cracker_PBL	121.57	30.29	8.5	-2.087	-2.0091	0.0036076	-16.1298	-15.9031	0.0080186	-2.3157	0.074793	0.52417	0.0096566	NaN	NaN	-18.5688	0.38507	0.7994	0.049919	22.8782	28.6632	34.4729	3.7414	60
	141022_3_C64	ajs	8.014	90.048	600	2.9603	7.5205	-18.7962	1200	60.101	7.4995	, datetime is calculated from sample id		"10/22/14,11:32:41"	35830	130506_Cracker_PBL	121.75	30.81	-10.4	-2.0801	-2.0021	0.0047762	-16.1963	-15.9708	0.0069955	-2.3635	0.070058	0.53951	0.0088777	NaN	NaN	-18.9264	0.45478	0.56986	0.059622	19.3957	33.4076	31.0827	4.3617	60
	141022_4_C64	ajs	7.872	90.3307	600	2.9015	7.6467	-19.228	1200	57.745	7.3355	, datetime is calculated from sample id		"10/22/14,13:44:45"	35837	130506_Cracker_PBL	116.54	29.61	26	-2.0874	-2.0095	0.0048187	-16.1852	-15.9596	0.0088769	-2.3773	0.095105	0.5198	0.011431	NaN	NaN	-19.1488	0.55776	0.32041	0.072046	-0.11174	53.2411	11.3344	6.9509	60
	141022_5_C64	kks	8.193	90.2245	600	2.2505	25.5012	-19.2547	1200	61.568	7.5147	, datetime is calculated from sample id		"10/22/2014,21:33:10"	35859	130506_Cracker_PBL	125.54	31.41	4.5	-2.0762	-1.9981	0.0037139	-16.1587	-15.9327	0.0082146	-2.3151	0.053058	0.54566	0.0070168	NaN	NaN	-19.0716	0.38588	0.34541	0.050506	6.0774	30.3386	17.5293	3.961	60
	141029_2_C64	kks	8.01	90.7544	600	2.9372	8.3444	-19.5137	1200	60.03	7.4944	, datetime is calculated from sample id		"10/29/2014,22:53:52"	36256	130506_Cracker_PBL	120.86	30.04	9.1	-2.0697	-1.9915	0.0036965	-16.1709	-15.9466	0.0066937	-2.3345	0.063671	0.53146	0.008233	NaN	NaN	-18.8355	0.36567	0.61085	0.047788	38.7192	24.4641	50.5638	3.1939	60
	141029_6_C64	kks	8.01	90.1011	600	3.0266	5.305	-18.1607	1200	60.203	7.516	jrk closed, datetime is calculated from sample id		"10/30/2014,7:41:36"	36284	130506_Cracker_PBL	122.45	30.38	-13.8	-2.0697	-1.9915	0.0045251	-16.1044	-15.8794	0.0084826	-2.2687	0.074961	0.52832	0.0097513	NaN	NaN	-18.8101	0.37681	0.50158	0.049074	-1.135	20.5601	10.1161	2.6835	60
	141029_7_C64	jrk	8.12	89.9854	600	3.1008	7.2495	-19.3744	1200	60.64	7.468	XRD'd before hand - testing, datetime is calculated from sample id		"10/30/2014,9:53:21"	36291	130506_Cracker_PBL	126.86	30.98	0.5	-2.0797	-2.0017	0.0042134	-16.021	-15.7949	0.0064836	-2.2026	0.076289	0.5172	0.0096419	NaN	NaN	-18.6156	0.44266	0.53073	0.058494	19.7983	27.0334	31.1227	3.529	60
	141117_6_C64	jrk	8.138	90.1243	600	7.5241	13.0532	-19.3255	1200	60.789	7.4698			"11/18/2014,7:35:49"	37659	130506_Cracker_PBL	122.98	29.61	-11	-2.2716	-2.1961	0.0051252	-15.9766	-15.7544	0.0066462	-2.3229	0.057797	0.53957	0.0074155	NaN	NaN	-18.5071	0.37182	0.55204	0.048707	46.0732	31.1876	57.8	4.071	60
	141118_2_C64	cps	8.381	90.07	600	6.1091	15.7514	-18.8896	1200	62.596	7.4688	second sample after new overnight bakeout with 2 hours of high vac, followed by 1 hour of gc bake, then more high vac bake,		"11/18/2014,20:30:42"	37696	130506_Cracker_PBL	129.07	30.72	-1.5	-2.1548	-2.0777	0.0046618	-15.9389	-15.7164	0.0068315	-2.1627	0.068547	0.54752	0.0087556	NaN	NaN	-18.6341	0.35837	0.34522	0.047043	15.1059	23.2565	26.2841	3.0355	60
	141120_2_C64	cps	7.797	89.9253	600	4.8678	37.5892	-18.9624	1200	58.584	7.5137	Reload carousel. Pump down until G1 is stable. Install heat tape on T1		"11/20/2014,20:31:33"	37847	130506_Cracker_PBL	118.13	28.93	27.8	-2.1389	-2.0616	0.0046616	-16	-15.7781	0.0079203	-2.1998	0.0741	0.55897	0.0090723	NaN	NaN	-18.5621	0.41204	0.54269	0.053338	26.7188	35.9552	38.1376	4.6923	60
	141120_3_C64	cps	8.506	90.0751	600	4.7534	13.2549	-19.3452	1200	63.882	7.5102			"11/20/2014,22:43:53"	37854	130506_Cracker_PBL	131.45	31.92	-29.7	-2.1233	-2.0458	0.0041274	-16.0575	-15.836	0.0075134	-2.2871	0.058748	0.5125	0.0076385	NaN	NaN	-18.9881	0.40317	0.22522	0.052387	7.9766	29.8049	19.289	3.8904	60
	141121_2_C64	jrk	8.33	90.0963	600	5.1449	31.7672	-20.143	1200	61.937	7.4354	opened carousel before - loaded during previous c64		"11/21/2014,22:12:53"	37925	130506_Cracker_PBL	125.45	30.81	17.7	-2.1092	-2.0316	0.0054794	-16.0543	-15.833	0.0058049	-2.2351	0.066752	0.55009	0.0087151	NaN	NaN	-18.8292	0.29367	0.38055	0.037939	3.5812	24.0574	14.823	3.1402	60
	141121_3_C64	jrk	8.47	90.0988	600	4.9578	13.9496	-19.5551	1200	61.907	7.309	residual wouldnt pump away		"11/22/2014,0:25:19"	37932	130506_Cracker_PBL	126.24	31.15	-15.9	-2.1133	-2.0357	0.0047298	-16.0585	-15.8372	0.0083277	-2.2752	0.07213	0.51589	0.0092627	NaN	NaN	-19.0055	0.42538	0.20934	0.055256	-9.7354	36.3751	1.3687	4.7479	60
	141121_10_C64	jrk	8.73	89.8197	600	5.8384	18.1081	-18.2369	1200	64.28	7.3631	cut ~5 minutes early		"11/22/2014,13:47:30"	37981	130506_Cracker_PBL	130.3	32.43	17.6	-2.1078	-2.0301	0.0046721	-15.8788	-15.6566	0.0075395	-2.0571	0.071598	0.54503	0.0089132	NaN	NaN	-18.5058	0.36882	0.35389	0.047521	-3.5375	33.1442	7.2636	4.3245	60
	141203_3_C64	EGH	8.529	90.1723	600	5.7138	12.771	-19.6992	1200	63.996	7.5033			"12/3/2014,17:50:21"	38224	130506_Cracker_PBL	131.1	31.75	6.1	-2.012	-1.9331	0.0046823	-16.0956	-15.875	0.0098134	-2.1852	0.070008	0.54789	0.0085307	NaN	NaN	-18.8965	0.44849	0.39539	0.058125	8.4018	33.743	19.6833	4.4039	60
	141205_1_C64	lkb	9.121	90.2621	600	5.8997	19.1521	-20.4941	1200	68.267	7.4846			"12/05/14,17:03:08"	38372	130506_Cracker_PBL	139.12	34.14	-11.1	-2.027	-1.9483	0.0041277	-16.1445	-15.924	0.0079187	-2.2599	0.082014	0.53763	0.010268	NaN	NaN	-19.134	0.36481	0.25262	0.047484	30.8988	30.8011	42.553	4.0206	60	good D47 mean on first sample
	141205_5_C64	lkb	8.496	90.2519	600	6.0176	11.1895	-19.7834	1200	63.249	7.4446			"12/06/14,01:50:07"	38400	130506_Cracker_PBL	127.83	31.75	3.2	-2.0288	-1.9501	0.0047198	-16.113	-15.8925	0.0077467	-2.2256	0.072456	0.54139	0.0090931	NaN	NaN	-18.6921	0.25408	0.63934	0.032992	36.3182	20.8103	47.9689	2.7158	60
	141209_1_C64	kks	8.01	90.0348	600	6.2962	38.7927	-20.48	1200	59.89	7.4769			"12/09/14,21:50:59"	38683	130506_Cracker_PBL	121.48	30.47	-30.2	-2.098	-2.0202	0.0041339	-15.9932	-15.7751	0.010369	-2.1806	0.064467	0.52902	0.0083885	NaN	NaN	-18.6591	0.38416	0.42984	0.049056	79.4694	28.4951	91.4184	3.7179	60
	141209_2_C64	kks	8.13	89.9529	600	6.7836	13.1716	-19.0291	1200	61.14	7.5203			"12/10/14,00:02:56"	38690	130506_Cracker_PBL	124.13	31.41	37.3	-2.0961	-2.0183	0.0047087	-15.977	-15.7589	0.0077584	-2.1287	0.076849	0.56504	0.0097196	NaN	NaN	-18.5238	0.39555	0.53493	0.051396	52.6817	26.1767	64.2957	3.4161	60
	141209_10_C64	jrk	8.345	90.0314	600	7.0214	10.8133	-20.0653	1200	63.349	7.5913			"12/10/14,17:39:56"	38746	130506_Cracker_PBL	126.77	32.35	-11	-2.1235	-2.046	0.0047149	-16.0003	-15.7826	0.0088498	-2.2123	0.060144	0.52952	0.0074637	NaN	NaN	-18.7199	0.42884	0.38237	0.055186	24.0855	40.3704	35.4593	5.2685	60
	141211_1_C64	jrk	8.072	89.1428	600	3.2564	31.5417	-20.6459	1200	63.377	7.8515	lifted dewers before opening v1 when pumping out carousel - pumping acid through cold T1, sat while at spruces defense		"12/12/2014,8:47:25"	38866	130506_Cracker_PBL	128.98	32.94	23.6	-2.1341	-2.0568	0.0039556	-15.9798	-15.7603	0.008093	-2.1877	0.064453	0.54429	0.0079882	NaN	NaN	-18.5374	0.35937	0.52688	0.046838	43.6014	23.8413	55.1609	3.1117	60
	141211_2_C64	jrk	8.12	89.3125	600	3.4467	10.1157	-20.3468	1200	60.645	7.4686			"12/12/2014,10:59:25"	38873	130506_Cracker_PBL	123.69	31.66	20.6	-2.14	-2.0628	0.0044943	-15.9071	-15.6873	0.0085701	-2.1076	0.08519	0.55581	0.010656	NaN	NaN	-18.5017	0.43038	0.41559	0.055868	0.26165	32.3084	11.1949	4.2159	60
	141212_3_C64	jrk	8.394	88.2576	600	5.483	22.7303	-19.879	1200	63.3	7.5411	vented acid bath/carousel before this sample, changed glassware.		"12/13/2014,2:07:29"	38926	130506_Cracker_PBL	129.77	33.2	-7.7	-2.141	-2.0638	0.0036251	-16.0173	-15.798	0.0071013	-2.2514	0.051598	0.52461	0.0067893	NaN	NaN	-19.0536	0.25885	0.076727	0.033947	-20.7281	22.9335	-9.803	2.9937	60
	141214_1_C64	andy	8.046	90.0006	600	3.1913	12.6193	-20.1876	1200	60.552	7.5257	froze T1 before opening V1 to evacuate carousel		"12/14/2014,11:43:30"	39032	130506_Cracker_PBL	122.8	31.66	26	-2.1756	-2.0988	0.0041679	-16.0136	-15.7951	0.0091093	-2.2721	0.080945	0.53453	0.0097376	NaN	NaN	-18.6284	0.52053	0.50305	0.06678	63.2877	44.035	75.1847	5.747	60
	141214_5_C64	andy	8.311	89.8998	600	4.7311	8.7895	-19.4964	1200	62.493	7.5193			"12/14/2014,20:32:16"	39060	130506_Cracker_PBL	127.39	33.2	6.5	-2.216	-2.1397	0.0034861	-16.0084	-15.7905	0.0071588	-2.3149	0.061109	0.5251	0.007783	NaN	NaN	-18.8093	0.30631	0.30813	0.040172	8.0342	17.5345	19.3406	2.2888	60
	141217_1_C64	jrk	8.275	89.935	600	4.8674	22.6158	-21.5	1200	62.283	7.5266	evacuated carousel with t1 frozen		"12/17/2014,18:36:50"	39281	130506_Cracker_PBL	128.01	33.54	5.9	-2.2283	-2.1522	0.0050615	-15.9514	-15.7351	0.0072309	-2.2621	0.063456	0.53141	0.0079682	NaN	NaN	-18.476	0.3571	0.53218	0.046285	40.9376	19.7298	52.5065	2.575	60
	141217_6_C64	jrk	8.02	89.9704	600	6.583	11.9767	-20.0509	1200	60.064	7.4893			"12/18/2014,5:34:40"	39316	130506_Cracker_PBL	123.42	32.43	-4.1	-2.2208	-2.1446	0.0046676	-15.9313	-15.7155	0.0079698	-2.2136	0.069869	0.55345	0.0089022	NaN	NaN	-18.5716	0.27714	0.39392	0.035544	6.8386	20.9567	17.9772	2.7347	60
	150102_10_C64	kks	8.08	90.2583	600	-0.15451	6.7445	-20.1716	1200	61.45	7.6052	Note: The vac pump recording did not go as low as previous runs (2.00e-07).		"1/3/2015,20:33:48"	40417	130506_Cracker_PBL	124.22	29.95	15.8	-2.003	-1.924	0.0051676	-16.004	-15.7851	0.006362	-2.0977	0.068656	0.5308	0.0088029	NaN	NaN	-18.7699	0.3484	0.33848	0.045501	8.5947	20.863	19.68	2.7227	60
	150108_1_C64	lkb	8.14	90.0773	600	8.6475	45.5711	-20.9151	1200	57.938	7.1177			"1/8/2015,18:38:58"	40786	130506_Cracker_PBL	117.34	29.35	-11.9	-2.0204	-1.9416	0.0040403	-15.9457	-15.7258	0.0085074	-2.0276	0.079536	0.55958	0.010005	NaN	NaN	-18.3672	0.49215	0.63063	0.063586	48.7231	41.9134	60.1447	5.4688	60
	150108_8_C64	kks	8.1	89.8557	600	9.9827	15.5662	-20.2628	1200	60.121	7.4223			"1/9/2015,7:54:05"	40828	130506_Cracker_PBL	127.04	31.06	-21.6	-2.1471	-2.0699	0.053669	-15.9882	-15.7692	0.098769	-2.2487	0.21186	0.50174	0.010302	NaN	NaN	-19.0482	0.81069	0.023201	0.086684	-17.6057	32.3588	-6.7053	4.1957	60
	150119_1_C64	egh	7.98	90.0213	600	9.0556	39.7933	-18.9207	1200	59.552	7.4627			"1/20/2015,10:46:29"	41671	130506_Cracker_PBL	121.92	33.46	-3.3	-2.0994	-2.0216	0.0094927	-15.723	-15.5079	0.019526	-1.8727	0.091681	0.56148	0.010026	NaN	NaN	-17.7228	0.57302	0.8353	0.078971	67.314	18.6314	78.5375	2.4278	60
	150119_2_C64	egh	7.988	89.9427	600	1.0847	13.4669	-19.4229	1200	59.462	7.4439			"1/20/2015,12:58:52"	41678	130506_Cracker_PBL	122.1	33.63	41.4	-2.1169	-2.0394	0.0048576	-16.0336	-15.8177	0.010339	-2.211	0.092309	0.56122	0.010855	NaN	NaN	-18.3314	0.62078	0.84611	0.079873	40.2332	47.1613	51.8512	6.1546	60
	150119_7_C64	egh	7.986	89.969	600	5.9397	12.848	-20.2989	1200	59.388	7.4365			"1/21/2015,0:01:26"	41713	130506_Cracker_PBL	126.77	34.14	36.4	-2.1321	-2.0548	0.005202	-16.0201	-15.8044	0.0083447	-2.2411	0.083509	0.52963	0.010168	NaN	NaN	-18.5848	0.51016	0.56042	0.065988	13.9526	37.6795	25.2634	4.9175	60
	150121_1_C64	egh	8.122	89.9252	600	-1.6216	42.0228	-19.6949	1200	60.165	7.4077			"1/22/2015,12:04:55"	41817	130506_Cracker_PBL	123.25	28.84	16.8	-2.147	-2.0698	0.004391	-15.9225	-15.7084	0.0089861	-2.1529	0.070883	0.53171	0.0088038	NaN	NaN	-18.5413	0.47333	0.4067	0.061212	40.3213	37.3828	51.7355	4.8782	60
	150123_1_C64	lkb	7.997	90.2368	600	-0.43112	41.1282	-21.4723	1200	58.538	7.32			"1/25/2015,15:43:31"	42056	130506_Cracker_PBL	120.69	29.18	21.6	-2.1615	-2.0845	0.004252	-15.9612	-15.7499	0.0088645	-2.1658	0.078296	0.57611	0.0096768	NaN	NaN	-17.9157	0.52819	1.123	0.067995	62.9288	32.9064	74.6925	4.2937	60	high D47 stderr
	150127_3_C64	djw	8.152	90.3204	600	0.6421	13.7465	-20.3106	1200	61	7.4828			"1/28/2015,11:53:37"	42267	130506_Cracker_PBL	123.95	30.47	15.7	-2.2309	-2.1548	0.0053955	-15.863	-15.6566	0.0082549	-2.1746	0.08313	0.53003	0.010046	NaN	NaN	-18.34	0.44879	0.4914	0.057967	2.9064	28.9746	13.8707	3.7799	60
	150127_12_C64	djw	8.3	90.1963	600	3.3064	9.0747	-19.7033	1200	60.509	7.2902			"1/29/2015,7:34:55"	42330	130506_Cracker_PBL	121.75	30.55	5.5	-2.2647	-2.1891	0.0072609	-15.8025	-15.5995	0.013794	-2.1463	0.095841	0.52851	0.010944	NaN	NaN	-18.1174	0.50005	0.59532	0.063147	5.6818	39.1582	16.5855	5.1068	60
	150129_1_C64	djw	7.918	90.112	600	5.2393	46.0877	-19.2112	1200	58.435	7.38			"1/30/2015,9:39:51"	42410	130506_Cracker_PBL	119.28	29.78	-12.2	-2.2824	-2.207	0.034777	-15.8494	-15.6476	0.065762	-2.1802	0.16446	0.56282	0.010312	NaN	NaN	-18.6551	1.7196	0.14244	0.20943	42.0353	75.6006	53.4448	9.8473	60
	150131_1_C64	djw	8.088	90.2024	600	-0.4123	51.3192	-21.2539	1200	60.085	7.4289			"2/1/2015,10:25:24"	42560	130506_Cracker_PBL	122.28	29.44	9	-2.2398	-2.1639	0.0041051	-15.8026	-15.6013	0.0081976	-2.1207	0.0624	0.53005	0.0083146	NaN	NaN	-18.5305	0.33005	0.17455	0.043794	58.2644	22.1666	69.7164	2.8939	60
	150131_10_C64	djw	8.21	90.0571	600	9.5912	12.3552	-19.6194	1200	59.884	7.294			"2/2/2015,6:00:47"	42623	130506_Cracker_PBL	120.51	29.53	-20.6	-2.2304	-2.1543	0.0042124	-15.7887	-15.5829	0.0078319	-2.0578	0.078482	0.57262	0.010327	NaN	NaN	-18.8386	0.46796	-0.16763	0.061975	-21.5562	32.3518	-11.01	4.2226	60
	150202_1_C64	djw	8.139	90.1272	600	7.5424	445.7	-21.2512	1200	56.219	6.9074			"2/3/2015,10:39:22"	42710	130506_Cracker_PBL	114.87	28.33	-3	-2.2548	-2.1791	0.0050552	-16.0976	-15.8832	0.0081348	-2.4224	0.068635	0.54931	0.0091757	NaN	NaN	-19.0972	0.38561	0.19597	0.05111	62.2566	25.1372	74.4116	3.2832	60
	150205_2_C64	andy	9.029	90.3701	600	2.0084	12.2668	-20.0982	1200	65.127	7.2131			"2/5/2015,21:45:20"	42859	130506_Cracker_PBL	131.45	33.03	14.9	-2.1371	-2.0598	0.0040453	-15.9624	-15.7446	0.0071177	-2.1609	0.069936	0.55696	0.0092409	NaN	NaN	-19.0177	0.38308	0.0019416	0.051092	-4.2622	26.2216	6.7317	3.4236	60
	150205_3_C64	andy	8.141	90.3152	600	2.8947	10.3581	-21.9279	1200	61.151	7.5115			"2/5/2015,23:55:59"	42866	130506_Cracker_PBL	124.04	31.24	-19.5	-2.136	-2.0587	0.0037892	-15.9616	-15.7432	0.0066051	-2.1886	0.049296	0.52503	0.0065892	NaN	NaN	-19.3167	0.39995	-0.30455	0.053188	-30.3902	27.5121	-19.6892	3.592	60
	150204_1_C64	djw	8.253	89.9344	600	9.9953	429.866	-21.6229	1200	57.289	6.9416			"2/6/2015,16:27:35"	42925	130506_Cracker_PBL	115.92	29.53	15.1	-2.2063	-2.1299	0.0040082	-16.1135	-15.8952	0.0065147	-2.408	0.076337	0.53161	0.010046	NaN	NaN	-19.1478	0.45682	0.17635	0.060351	63.0485	35.2565	75.1947	4.6044	60
	150209_1_C64	egh	8.056	90.6684	600	-3.5532	54.0402	-21.444	1200	60.275	7.482			"2/10/2015,10:18:11"	43220	130506_Cracker_PBL	123.69	29.1	-11.5	-2.0976	-2.0198	0.0047614	-15.9666	-15.7506	0.0070078	-2.147	0.068903	0.53516	0.0091766	NaN	NaN	-18.9172	0.45145	0.11275	0.059807	56.4644	30.7902	68.0997	4.0199	60
	150209_10_C64	egh	8.111	90.5341	600	-1.5366	10.0138	-21.818	1200	61.145	7.5385			"2/11/2015,1:47:49"	43283	130506_Cracker_PBL	122.98	29.53	-16.4	-2.0833	-2.0053	0.0045726	-15.9585	-15.743	0.0079613	-2.1269	0.073098	0.53272	0.0098666	NaN	NaN	-19.2529	0.42478	-0.24595	0.056767	-27.7029	25.5485	-17.0302	3.3362	60
	150213_1_C64	cps	8.029	90.254	600	0.61908	162.736	-21.6749	1200	59.492	7.4096			"2/15/2015,6:17:48"	43603	130506_Cracker_PBL	120.07	29.78	3.5	-2.0795	-2.0015	0.0042504	-16.0831	-15.7961	0.0077211	-2.2522	0.074275	0.53247	0.0098742	NaN	NaN	-19.1906	0.3992	0.070386	0.053295	68.5736	28.2015	80.5788	3.683	60
	150223_1_C64	krh	8.808	89.0059	600	-3.7167	73.8222	-21.1366	1200	66.167	7.5121			"2/24/2015,20:47:28"	44194	130506_Cracker_PBL	133.48	32.26	-12	-2.1734	-2.0966	0.0045228	-15.8192	-15.5267	0.0069663	-2.0854	0.058834	0.517	0.0078611	NaN	NaN	-18.4833	0.31013	0.256	0.040469	61.7326	50.6067	73.1867	6.6037	60
	150227_1_C64	sws	7.988	90.2677	600	-6.4517	22.0915	-20.9953	1200	58.642	7.3413	1 drop		"03/01/15,15:29:30"	44539	130506_Cracker_PBL	117.87	27.99	-0.8	-2.0623	-1.984	0.0054916	-16.1081	-15.7891	0.0082944	-2.2701	0.064455	0.52326	0.0084455	NaN	NaN	-19.1599	0.26367	0.15256	0.034745	77.4729	34.0737	89.6153	4.4491	60
	150305_1_c64	randy	8.112	90.3007	600	-6.1146	124.332	-21.2577	1200	59.338	7.3148			"3/6/2015,19:03:25"	44907	150305_Cracker_PBL	120.25	28.84	-0.2	-2.1231	-2.0456	0.0043022	-15.9958	-15.6093	0.0070986	-2.1915	0.072996	0.54668	0.009314	NaN	NaN	-18.645	0.3134	0.44962	0.041393	205.469	43.1303	218.858	5.6303	60
	150317_1_C64	sws	7.942	90.0354	600	-6.9898	7.8151	-20.8528	1200	59.742	7.5223	N-grease used on acid vessel o-ring,		"03/17/15,18:34:30"	45716	150305_Cracker_PBL	122.8	30.72	-10.7	-2.1802	-2.1035	0.0044509	-15.8195	-15.4	0.0090519	-2.0825	0.070044	0.5277	0.0089256	NaN	NaN	-17.9547	0.42097	0.79529	0.054655	68.4481	32.3596	79.9832	4.2225	60	y
	150605_1_C64	andy	7.124	90.3464	600	-2.9423	6.4176	-20.5475	1200	52.042	7.3052			"6/5/2015,15:38:13"	50929	130506_Cracker_repeat	107.19	25.25	17.2	-2.2191	-2.1429	0.0060408	-15.8454	-15.5411	0.0076475	-2.1626	0.062674	0.51084	0.0081748	NaN	NaN	-19.2835	0.2458	-0.5062	0.032333	-16.6209	5.7896	-5.9184	0.75609	60
cor
	141016_3_cor	cps	8.011	90.434	600	2.6577	13.8852	-21.106	1200	58.061	7.2477	, datetime is calculated from sample id		"10/18/2014,1:06:32"	35495	130506_Cracker_PBL	117.07	28.41	-20.7	-2.172	-2.0952	0.0044387	-4.8941	-4.4525	0.0067078	9.3223	0.069606	0.63917	0.0087945	NaN	NaN	3.5652	0.31839	0.41581	0.04055	97.6845	27.9188	85.3259	3.5634	60
	141017_1_cor	lkb	8.423	90.4464	600	1.5454	21.1283	-18.8709	1200	61.784	7.3352	, datetime is calculated from sample id		"10/18/14,19:32:19"	35553	130506_Cracker_PBL	124.83	30.47	-4.2	-2.1301	-2.0527	0.0050618	-4.9093	-4.4868	0.0065567	9.3364	0.064678	0.62698	0.0082029	NaN	NaN	3.7132	0.32231	0.59378	0.041101	129.8	23.4037	117.068	2.9868	60
	141021_2_cor	cps	8.305	90.0796	600	2.2753	16.2407	-19.968	1200	61.114	7.3587	, datetime is calculated from sample id		"10/21/14,15:27:43"	35767	130506_Cracker_PBL	122.54	30.81	-15.9	-2.22	-2.1438	0.0039229	-4.8536	-4.4404	0.0076134	9.3217	0.066054	0.64432	0.0087513	NaN	NaN	3.757	0.36521	0.52586	0.046607	82.3039	21.4044	70.0826	2.7315	60
	141029_9_cor	jrk	8.709	89.9276	600	3.5903	8.5547	-19.289	1200	63.922	7.3398	XRD'd before hand - testing, datetime is calculated from sample id		"10/30/2014,14:17:19"	36305	130506_Cracker_PBL	128.36	32.09	1	-2.4316	-2.3582	0.0047552	-4.9358	-4.5668	0.0059566	9.0249	0.054007	0.6409	0.0069491	NaN	NaN	3.5533	0.30286	0.48895	0.039259	75.6774	17.7212	63.9331	2.2628	60
	141029_10_cor	jrk	8.074	90.1596	600	3.6573	8.7661	-19.4406	1200	58.464	7.241	XRD'd before hand - testing, datetime is calculated from sample id		"10/30/2014,16:29:12"	36312	130506_Cracker_PBL	117.78	29.7	11.6	-2.4284	-2.3549	0.0046924	-4.9683	-4.6453	0.0077345	8.994	0.060872	0.64045	0.0077499	NaN	NaN	3.4116	0.31189	0.41298	0.039505	66.5303	27.4045	54.9509	3.499	60
	141116_5_cor	ajs	8.924	89.8311	600	5.9678	10.9979	-18.7629	1200	65.535	7.3437			"11/16/2014,21:18:00"	37551	130506_Cracker_PBL	132.77	31.66	2.5	-2.2445	-2.1686	0.0046326	-4.6823	-4.3648	0.0057484	9.4532	0.06003	0.62142	0.0075828	NaN	NaN	3.8326	0.29106	0.25731	0.037448	57.3876	17.6593	45.1133	2.2533	60
	141116_6_cor	ajs	9.051	90.0823	600	5.8102	10.2974	-19.5279	1200	65.51	7.2379			"11/16/2014,23:29:53"	37558	130506_Cracker_PBL	133.65	31.83	6.5	-2.31	-2.235	0.0040861	-4.6814	-4.379	0.0066921	9.3795	0.065141	0.61072	0.0081371	NaN	NaN	4.4119	0.43118	0.833	0.054878	97.0071	36.5617	84.3437	4.6652	60
	141203_2_COR	EGH	7.95	90.1557	600	5.7869	14.294	-18.8039	1200	58.268	7.3293			"12/3/2014,15:38:33"	38217	130506_Cracker_PBL	118.66	28.93	-15.3	-2.1482	-2.0711	0.0046855	-4.8141	-4.5364	0.0082247	9.421	0.08416	0.63114	0.010242	NaN	NaN	3.547	0.46236	0.23693	0.058604	63.0654	32.5486	50.9011	4.1527	60
	141203_6_COR	EGH	7.99	90.0285	600	6.0053	10.7613	-20.0977	1200	58.65	7.3404			"12/04/14,21:19:15"	38310	130506_Cracker_PBL	119.19	29.27	0.3	-2.1184	-2.0409	0.0038754	-4.8615	-4.5581	0.0078591	9.4309	0.068481	0.66266	0.0083182	NaN	NaN	3.7907	0.38445	0.57498	0.049106	101.063	30.5005	88.5366	3.8919	60
	141204_1_coral	lkb	8.1	90.0146	600	5.3305	51.236	-20.8134	1200	59.422	7.336			"12/04/14,23:31:09"	38317	130506_Cracker_PBL	120.25	29.61	15.9	-2.1466	-2.0694	0.0057798	-4.8499	-4.5204	0.0074961	9.3823	0.062081	0.62763	0.0078628	NaN	NaN	3.4111	0.4092	0.17326	0.052071	69.3186	28.5447	57.1573	3.6424	60
	141204_2_coral	lkb	8.634	90.1913	600	5.7939	13.8895	-19.8444	1200	62.892	7.2842			"12/05/14,01:43:04"	38324	130506_Cracker_PBL	127.39	31.24	-5.1	-2.1591	-2.0821	0.0039357	-4.8123	-4.4967	0.0070885	9.4017	0.063169	0.62007	0.0078709	NaN	NaN	3.4172	0.27591	0.10408	0.035277	55.502	20.1597	43.432	2.5727	60
	141204_5_coral	lkb	9.967	90.154	600	6.038	11.9061	-19.3926	1200	73.383	7.3626			"12/05/14,08:19:31"	38345	130506_Cracker_PBL	147.94	36.62	-1.8	-2.1788	-2.1021	0.0051687	-4.8105	-4.5248	0.009007	9.4241	0.065281	0.66273	0.0080397	NaN	NaN	3.7236	0.40743	0.40586	0.051908	86.738	29.7616	74.3292	3.7976	60
	141208_2_Coral	kks	8.02	89.424	600	6.1298	14.0878	-20.0886	1200	58.58	7.3042	Had a leaky tube. Was able to catch this before sample was advanced. Everything looked fine through the prepline.		"12/8/2014,23:05:11"	38612	130506_Cracker_PBL	119.01	29.87	21.4	-2.2013	-2.1249	0.0044325	-4.7128	-4.4617	0.0084601	9.4989	0.073768	0.65833	0.0092315	NaN	NaN	3.9653	0.37477	0.45059	0.047585	93.4562	26.6066	80.7833	3.394	60
	141208_6_Coral	kks	8.06	89.5531	600	6.1467	10.9595	-19.9486	1200	58.382	7.2434	cut by julia		"12/9/2014,5:42:19"	38633	130506_Cracker_PBL	119.01	29.7	-2.2	-2.1818	-2.1051	0.0047389	-4.7537	-4.5223	0.0085469	9.469	0.086127	0.65114	0.010424	NaN	NaN	3.777	0.45673	0.34501	0.057647	94.3565	34.1032	81.7408	4.3508	60
	141210_1_cor	jrk	8.735	90.1852	600	6.2042	32.2335	-20.5966	1200	64.351	7.367	negative residual that wont pump away?		"12/10/2014,21:57:24"	38756	130506_Cracker_PBL	130.3	32.94	-10.3	-2.2142	-2.1379	0.0046343	-4.7342	-4.5131	0.0082719	9.4412	0.064687	0.63395	0.0080768	NaN	NaN	3.7226	0.35952	0.25176	0.04528	105.466	22.6066	92.7158	2.8838	60
	141210_10_cor	jrk	8.072	89.1321	600	5.8081	9.482	-20.0472	1200	58.369	7.231			"12/11/2014,17:46:48"	38819	130506_Cracker_PBL	117.78	30.21	-9.4	-2.2078	-2.1314	0.0042916	-4.692	-4.445	0.007935	9.5053	0.066113	0.64913	0.0080804	NaN	NaN	3.8178	0.28308	0.26196	0.035884	81.5882	26.478	69.0151	3.3782	60
	141212_1_cor	jrk	8.363	89.9966	600	4.0617	28.2227	-21.5415	1200	60.959	7.2891	pumped carousel with dewers up		"12/12/2014,21:43:10"	38912	130506_Cracker_PBL	125.27	31.92	-13	-2.3024	-2.2273	0.004606	-4.8149	-4.5571	0.0066051	9.2738	0.06869	0.63722	0.0088349	NaN	NaN	3.7536	0.39401	0.44521	0.050061	124.925	29.8475	112.23	3.8091	60
	141212_2_cor	jrk	8.514	90.0338	600	5.1325	12.6252	-19.5924	1200	61.138	7.1809			"12/12/2014,23:55:20"	38919	130506_Cracker_PBL	125.72	32.18	0.5	-2.2623	-2.1867	0.003989	-4.7802	-4.5287	0.0075206	9.3441	0.064046	0.63184	0.0079008	NaN	NaN	3.8245	0.38669	0.44606	0.049179	91.2771	24.8103	78.8419	3.166	60
	141212_10_cor	jrk	8.492	90.1292	600	5.9503	13.3722	-19.0651	1200	62.22	7.3269			"12/13/2014,17:32:04"	38975	130506_Cracker_PBL	126.95	32.77	0.9	-2.2654	-2.1898	0.0042947	-4.79	-4.5391	0.0069162	9.3098	0.074131	0.60923	0.0093806	NaN	NaN	3.4793	0.31029	0.12155	0.04003	53.5146	23.3704	41.5322	2.9827	60
	141216_1_cor	andy	6.483	89.9128	600	3.7836	10.5739	-19.9528	1200	47.347	7.3033	lifter A was up while pumping out carousel, high vac was 2.8e-7 when bakeout was complete after this sample		"12/16/2014,13:06:27"	39188	130506_Cracker_PBL	96.43	25.42	-6	-2.3621	-2.2878	0.0040844	-4.6809	-4.4654	0.0073854	9.3766	0.069511	0.66172	0.0083685	NaN	NaN	4.1595	0.38118	0.58071	0.048174	176.102	26.4409	162.588	3.3733	60
	141218_1_cor	jrk	8.113	90.1606	600	7.7684	29.7804	-20.8143	1200	59.24	7.3019			"12/18/14,19:39:34"	39359	130506_Cracker_PBL	121.66	31.92	1.3	-2.3739	-2.2997	0.00495	-4.6892	-4.4987	0.0067876	9.3273	0.078258	0.63075	0.0099372	NaN	NaN	3.9426	0.37393	0.38132	0.048319	103.022	21.0861	90.3764	2.6911	60
	141218_2_cor	jrk	8	89.7842	600	8.8994	15.0893	-20.0532	1200	58.593	7.3241	T1 wouldn't pump out before dropping sample (stuck at 11mT) residual not pumped away cut with v9 open check out that mass		"12/18/14,21:51:05"	39366	130506_Cracker_PBL	120.69	31.75	-2.2	-2.3662	-2.2919	0.0048178	-4.6374	-4.4402	0.0076057	9.3993	0.074038	0.64237	0.0090605	NaN	NaN	3.9261	0.53083	0.26096	0.067292	64.7157	38.2364	52.3904	4.8783	60
	141218_8_cor	jrk	8.861	90.2129	600	7.948	13.1171	-20.8286	1200	63.767	7.1964			"12/19/14,11:00:53"	39408	130506_Cracker_PBL	129.33	34.48	43.1	-2.2411	-2.1652	0.0055007	-4.6552	-4.4485	0.0062523	9.5307	0.067498	0.67053	0.0084929	NaN	NaN	4.1471	0.32126	0.51629	0.041366	83.6969	29.2906	71.0561	3.7372	60
	150104_1_Cor	kks	8.13	90.0846	600	0.24696	16.7069	-20.6071	1200	59.66	7.3383	The temperature of T3 was not cold enough, so step #13 took an extra 20+ minutes. Screen shot was taken and saved. T3 temp at time of pic was -19.0		"1/4/2015,21:20:32"	40490	130506_Cracker_PBL	122.36	29.35	13.1	-2.2015	-2.1251	0.0038812	-4.8239	-4.5796	0.0074488	9.3677	0.065475	0.6412	0.0082719	NaN	NaN	3.7596	0.4574	0.46876	0.058615	121.301	33.506	108.554	4.2761	60
	150106_1_cor	kal	8.333	89.9108	600	1.3267	17.4289	-19.9833	1200	59.946	7.1938			"1/7/2015,10:51:58"	40692	130506_Cracker_PBL	122.1	30.21	11.4	-2.053	-1.9746	0.0049424	-4.7282	-4.4734	0.0077979	9.6127	0.070771	0.64098	0.0091578	NaN	NaN	3.9498	0.32413	0.46557	0.04181	112.508	22.8018	99.4853	2.9085	60
	150106_10_cor	kal	8.48	90.065	600	8.2444	15.1718	-19.4009	1200	63.196	7.4524			"1/8/2015,2:16:42"	40741	130506_Cracker_PBL	126.95	32	5.7	-2.1742	-2.0974	0.0046464	-4.8779	-4.6113	0.0069384	9.3411	0.074461	0.64364	0.0097657	NaN	NaN	3.6911	0.28086	0.5088	0.035827	83.5462	15.6213	71.3138	1.9935	60
	150109_1_cor	kks	8.036	89.9325	600	8.1437	38.7967	-20.8148	1200	58.702	7.3049			"1/9/2015,17:20:37"	40854	130506_Cracker_PBL	118.31	29.95	8.8	-2.2118	-2.1355	0.0043655	-4.6882	-4.4505	0.0092828	9.5028	0.089884	0.64651	0.010579	NaN	NaN	4.0298	0.59183	0.46549	0.074674	109.997	47.891	97.0901	6.109	60
	150109_7_cor	kks	8.296	89.9756	600	8.7739	18.4817	-20.5151	1200	61.035	7.3572	cut by julia. residual pumped away		"1/10/2015,6:33:12"	40896	130506_Cracker_PBL	128.01	31.66	33.9	-2.4344	-2.361	0.0047977	-4.717	-4.4919	0.0071503	9.2439	0.076302	0.6362	0.0096331	NaN	NaN	3.9595	0.38921	0.4543	0.049557	75.9841	35.7957	63.7718	4.568	60
	150120_2_COR	egh	7.967	89.9567	600	-1.7766	11.1748	-19.7816	1200	58.66	7.3629			"1/21/2015,13:18:39"	41746	130506_Cracker_PBL	120.07	27.82	14.6	-2.1525	-2.0754	0.0053484	-4.677	-4.4909	0.0072988	9.5729	0.073076	0.64651	0.0089083	NaN	NaN	4.0675	0.39313	0.48026	0.050254	75.6324	24.8281	63.0369	3.1667	60
	150120_11_COR	egh	7.97	89.9455	600	0.10336	11.1669	-19.699	1200	58.375	7.3243			"1/22/2015,9:04:39"	41809	130506_Cracker_PBL	118.66	28.24	-6.9	-2.1887	-2.1121	0.0054466	-4.6655	-4.4969	0.0093595	9.5253	0.078141	0.6211	0.0093611	NaN	NaN	3.9916	0.48668	0.38178	0.061566	77.2666	45.3705	64.6658	5.7869	60
	150122_1_cor	jrk	9.649	89.7051	600	2.512	54.1246	-20.3332	1200	70.55	7.3116		unknown	"1/23/2015,15:28:11"	41903	130506_Cracker_PBL	143.97	34.31	-18	-2.2514	-2.1756	0.0050905	-4.683	-4.5484	0.0084214	9.4437	0.061603	0.6193	0.0076591	NaN	NaN	3.8514	0.41535	0.27747	0.052828	77.223	26.4889	64.7278	3.3788	60
	150126_1_cor	djw	8.213	90.3371	600	2.8162	59.7198	-20.8179	1200	60.136	7.3221			"01/27/15,13:22:18"	42196	130506_Cracker_PBL	120.33	29.7	7.5	-2.3673	-2.293	0.0049092	-4.6007	-4.5034	0.0094764	9.4481	0.057144	0.65521	0.006678	NaN	NaN	4.3977	0.35965	0.65715	0.045149	136.371	27.461	123.137	3.502	60
	150127_2_cor	djw	8.357	90.3233	600	1.7326	16.4818	-21.7586	1200	60.937	7.2917			"01/28/15,09:04:23"	42259	130506_Cracker_PBL	122.01	30.64	31.5	-2.3696	-2.2954	0.0046159	-4.5449	-4.4856	0.0084036	9.4941	0.066223	0.64506	0.0083537	NaN	NaN	4.4456	0.4232	0.59268	0.053588	94.5499	25.4308	81.6831	3.2432	60
	150128_1_cor	djw	8.392	90.0549	600	-0.005293	29.5853	-22.2604	1200	61.073	7.2775			"1/29/2015,10:43:47"	42338	130506_Cracker_PBL	124.04	30.98	-10.9	-2.3428	-2.2682	0.0053828	-4.4922	-4.4765	0.012421	9.5712	0.074798	0.64101	0.0087507	NaN	NaN	4.5684	0.43076	0.60912	0.052952	113.452	33.7662	100.217	4.3043	60
	150128_10_cor	djw	8.225	90.2758	600	-0.58786	5.2769	-20.1342	1200	59.964	7.2905			"1/30/2015,6:26:16"	42401	130506_Cracker_PBL	121.66	30.55	-8.5	-2.3668	-2.2925	0.0093897	-4.4765	-4.4857	0.019602	9.5813	0.11029	0.65982	0.011404	NaN	NaN	4.6622	0.74648	0.67117	0.091353	91.847	51.008	78.8588	6.5007	60	d47 and D47 stderr a little high
	150130_1_cor	djw	8.003	90.32	600	8.8562	62.2307	-19.9668	1200	58.354	7.2915			"01/31/15,10:43:33"	42489	130506_Cracker_PBL	118.84	29.78	-3.3	-2.3802	-2.3061	0.041085	-4.4664	-4.4815	0.093866	9.5627	0.29995	0.64275	0.027464	NaN	NaN	4.2832	0.69198	0.2733	0.071453	90.1999	49.6276	77.2205	6.3155	60	slightly high d47 and D47 stderr
	150201_1_cor	djw	8.344	90.1729	600	3.3452	60.4375	-22.9308	1200	61.017	7.3127			"2/2/2015,9:53:27"	42634	130506_Cracker_PBL	123.77	29.95	4.9	-2.3745	-2.3003	0.0042246	-4.516	-4.4489	0.0062122	9.5188	0.077387	0.64465	0.010214	NaN	NaN	4.3477	0.42016	0.43726	0.054094	129.288	31.6516	115.955	4.0382	60
	150203_1_cor	djw	8.195	90.2177	600	8.318	452.086	-19.3907	1200	55.584	6.7827			"2/4/2015,10:32:30"	42781	130506_Cracker_PBL	112.66	28.07	-18.2	-2.4483	-2.3751	0.0053531	-4.8753	-4.6856	0.00855	9.0933	0.085748	0.66451	0.011377	NaN	NaN	3.7293	0.47112	0.5428	0.061508	127.804	37.4014	115.375	4.7766	60
	150210_1_COR	egh	8.232	90.6557	600	0.043471	64.8657	-21.5383	1200	60.07	7.2971			"2/11/2015,9:47:41"	43307	130506_Cracker_PBL	122.45	29.18	17.2	-2.2377	-2.1617	0.004665	-4.602	-4.4204	0.0078412	9.5861	0.068056	0.66739	0.008987	NaN	NaN	4.4888	0.21036	0.7498	0.027124	121.775	23.5477	108.57	3.0049	60
	150210_10_COR	egh	8.154	90.4174	600	-0.1862	11.0886	-21.7234	1200	60.565	7.4276			"2/12/2015,4:05:55"	43370	130506_Cracker_PBL	123.07	29.44	21.1	-2.2121	-2.1358	0.0054172	-4.6879	-4.5675	0.0079768	9.4933	0.089086	0.63622	0.012095	NaN	NaN	3.6255	0.50494	0.062011	0.066073	29.0683	43.2109	17.1004	5.5153	60
	150224_1_cor	cps	8.657	90.2297	600	-3.5127	28.9323	-20.99	1200	61.899	7.1502			"02/25/15,18:35:22"	44261	130506_Cracker_PBL	124.66	30.81	-1.2	-2.3333	-2.2586	0.0044447	-4.5586	-4.4564	0.0072842	9.4939	0.068415	0.6218	0.0087573	NaN	NaN	4.0495	0.29593	0.2255	0.037945	194.838	39.8507	180.785	5.0835	60
	150304_1_cor	randy	NaN	90.4304	600	-6.905	34.02	-21.8297	1200	62.109	NaN	foil was still on T3 during lifter operation.		"3/5/2015,14:55:49"	44821	150305_Cracker_PBL	125.63	30.12	9.9	-2.2034	-2.127	0.0045583	-4.6729	-4.5464	0.0069672	9.4963	0.05867	0.61388	0.0076422	NaN	NaN	3.7917	0.3225	0.19753	0.040752	208.115	53.8314	194.024	6.8676	60
	150304_10_cor	randy	8.319	90.1475	600	-6.7935	3.8279	-21.9447	1200	61.103	7.345	pumped away residual		"3/6/2015,11:01:44"	44884	150305_Cracker_PBL	122.63	29.87	-6.4	-2.2352	-2.1592	0.0037509	-4.6368	-4.5127	0.0066661	9.5714	0.065859	0.68758	0.0084948	NaN	NaN	3.8239	0.26519	0.15726	0.034555	86.0809	33.6152	73.3666	4.2895	60
	150407_1_coral	cps	6.891	90.0697	600	-8.2296	20.2895	-20.6239	1200	49.003	7.1112			"4/7/2015,18:18:49"	47184	150305_Cracker_PBL	99.69	24.82	-13.4	-2.3702	-2.296	0.0040566	-4.5683	-4.5	0.0074536	9.4548	0.088869	0.62963	0.011017	NaN	NaN	4.2681	0.53737	0.46297	0.06837	108.092	43.3588	95.1188	5.5312	60
C2
	150211_1_C2	egh	8.058	90.5316	600	-1.1596	39.809	-21.4002	1200	61.295	7.6067			"02/12/15,12:10:56"	43394	130506_Cracker_PBL	125.19	30.21	-6.7	-48.425	-48.9526	0.004851	-16.6874	-16.47	0.0064097	-48.0834	0.050736	0.44895	0.0073372	NaN	NaN	-23.086	0.33604	-2.4665	0.044231	-150.554	23.8692	-97.8376	3.2726	60
	150211_10_C2	egh	8.147	90.718	600	2.457	8.8874	-21.7341	1200	61.335	7.5285			"02/13/15,08:03:30"	43457	130506_Cracker_PBL	123.07	30.47	11.7	-48.3976	-48.9249	0.0050801	-16.7806	-16.4956	0.0085577	-48.1263	0.060288	0.47426	0.0082392	NaN	NaN	-23.4336	0.33831	-2.6326	0.044581	-250.783	18.3084	-204.139	2.5103	60
	150212_1_C2	lkb	8.447	90.2798	600	-0.49181	212.409	-21.2075	1200	62.057	7.3466			"2/13/2015,11:01:36"	43465	130506_Cracker_PBL	125.98	30.81	-11.8	-48.443	-48.9709	0.0037218	-16.7958	-16.5047	0.0068646	-48.2462	0.062883	0.40552	0.0087672	NaN	NaN	-23.4199	0.30566	-2.5877	0.04058	-172.514	23.0504	-120.947	3.1613	60
	150212_9_C2	jrk	8.641	90.4599	600	-0.12589	6.7031	-21.3111	1200	65.862	7.622	Some extra powder from autosampler dropped too		"2/14/2015,4:27:37"	43521	130506_Cracker_PBL	131.54	32.52	1.8	-48.394	-48.9212	0.0039874	-16.8348	-16.5362	0.0058827	-48.1458	0.065139	0.50873	0.0086967	NaN	NaN	-23.5912	0.25157	-2.6838	0.033129	-247.444	21.5036	-200.508	2.9486	60
	150218_1_C2	krh	8.632	90.4522	600	-4.6274	51.1997	-20.4701	1200	66.929	7.7536			"2/24/2015,2:32:55"	44137	130506_Cracker_PBL	133.12	32.09	-20.4	-48.4909	-49.0194	0.0047748	-16.7043	-16.4081	0.0076203	-48.0619	0.066155	0.56456	0.0089814	NaN	NaN	-21.7079	0.28554	-1.0247	0.037277	-258.488	39.0219	-212.367	5.3491	60
	150218_6_C2	krh	8.309	90.2037	600	-2.2143	9.3727	-21.5125	1200	62.861	7.5654			"2/24/2015,13:20:46"	44172	130506_Cracker_PBL	126.16	30.98	-1.6	-48.4733	-49.0016	0.0045292	-16.7225	-16.415	0.0063867	-48.0568	0.064662	0.57123	0.0086813	NaN	NaN	-21.87	0.30748	-1.1533	0.040203	-335.034	38.3604	-293.643	5.2587	60
	150225_1_C2	sws	8.091	90.0181	600	-1.5198	19.6713	-21.6839	1200	61.69	7.6245			"2/26/2015,13:36:42"	44320	130506_Cracker_PBL	124.57	29.44	20.6	-48.4912	-49.0197	0.0046338	-16.7784	-16.4709	0.0072756	-48.1208	0.067817	0.58093	0.0094384	NaN	NaN	-21.7357	0.2647	-0.90259	0.034582	-166.43	41.4866	-114.471	5.6887	60
	150303_1_C2	randy	8.521	90.4085	600	-7.9549	39.9827	-21.4563	1200	65.024	7.631			"3/4/2015,8:52:31"	44742	130506_Cracker_PBL	131.71	31.32	-3	-48.3293	-48.8557	0.0054763	-16.852	-16.503	0.0061295	-48.0564	0.053331	0.55739	0.0069506	NaN	NaN	-22.0075	0.30405	-1.0315	0.039897	-221.022	39.4812	-172.472	5.4133	60
	150303_10_C2	randy	NaN	90.0481	600	-5.7357	2.7255	-21.7181	1200	63.853	NaN			"3/5/2015,4:29:16"	44805	130506_Cracker_PBL	127.83	31.06	-4.4	-48.3231	-48.8494	0.0057834	-16.83	-16.4329	0.006312	-47.9565	0.048568	0.63888	0.0065341	NaN	NaN	-22.139	0.24294	-1.2105	0.032088	-375.617	34.1063	-336.703	4.6757	60
	150311_1_C2a	lkb	8.389	89.9934	600	-10.4668	111.266	-21.7082	1200	63.859	7.6122	G1 was pumping down until high vac - then it started goin up. - how did leak appear?, leak in bottom of glass vessel too.		"3/12/2015,9:57:18"	45313	150305_Cracker_PBL	129.6	31.15	-7.8	-48.4989	-49.0275	0.022599	-16.9089	-16.468	0.034052	-48.2931	0.081914	0.54012	0.0084625	NaN	NaN	-22.6143	0.38917	-1.5351	0.046441	-167.439	28.5059	-115.303	3.9051	60
	150322_1_C2	andy	4.284	90.2419	600	-6.5237	5.7281	-21.6196	1200	32.737	7.6417	20 minute acid pump time		"3/22/2015,11:57:21"	46073	150305_Cracker_PBL	66.35	16.02	-36.9	-48.5329	-49.0619	0.004799	-16.9705	-16.5052	0.0083153	-48.5622	0.097398	0.34197	0.01246	NaN	NaN	-23.903	0.68319	-2.7267	0.089067	-209.05	57.6625	-159.375	7.909	60
	150322_2_C2	andy	6.292	90.3695	600	-5.3436	3.8263	-21.9202	1200	48.264	7.6707	20 minute acid pump time		"3/22/2015,14:07:46"	46080	150305_Cracker_PBL	98.11	23.54	-6	-48.5415	-49.0707	0.0044529	-16.9934	-16.5345	0.0061534	-48.5771	0.073462	0.3601	0.010199	NaN	NaN	-24.6153	0.40521	-3.408	0.053399	-363.571	36.0412	-323.528	4.9443	60
	150322_3_C2	andy	7.942	90.0135	600	-5.3103	3.4262	-21.8993	1200	61.049	7.6869	20 minute acid pump time		"3/22/2015,16:17:21"	46087	150305_Cracker_PBL	123.95	29.61	13.1	-48.5305	-49.0595	0.0045987	-16.9683	-16.5183	0.0071853	-48.5074	0.085748	0.39873	0.011266	NaN	NaN	-24.3212	0.53444	-3.1585	0.069941	-337.539	37.9576	-295.91	5.2065	60
	150406_8_C2	cps	7.692	88.6579	600	-6.6837	1.9644	-21.6054	1200	57.825	7.5176			"4/7/2015,11:39:59"	47163	150305_Cracker_PBL	116.54	28.76	3.3	-48.5952	-49.1251	0.0050886	-16.7941	-16.47	0.0065776	-48.4469	0.065594	0.34444	0.0090262	NaN	NaN	-24.232	0.2826	-3.4198	0.037652	-337.31	26.9536	-295.866	3.6961	60
ETH1
	150302_1_ETH_1	randy	8.47	90.3514	600	-7.6735	40.3542	-20.598	1200	63.215	7.4634			"3/3/2015,9:57:06"	44671	130506_Cracker_PBL	127.3	30.38	19.6	2.0262	2.1579	0.0046241	-2.5789	-2.4955	0.0072316	15.4369	0.060624	0.18591	0.0076543	NaN	NaN	8.2657	0.28229	0.42673	0.036156	301.585	58.9491	275.587	7.4578	60
	150302_10_ETH_1	randy	9.368	90.4198	600	-6.1573	7.2999	-21.5352	1200	69.425	7.4109			"3/4/2015,5:35:33"	44734	130506_Cracker_PBL	139.39	33.46	-12.1	2.0298	2.1615	0.0048733	-2.5289	-2.4456	0.0073427	15.6157	0.067617	0.31666	0.0086608	NaN	NaN	8.0578	0.27321	0.12043	0.034719	125.969	44.1102	103.358	5.58	60
ETH2
	141010_3_ETH2	ajs	9.901	90.3971	600	1.9975	10.2593	-18.7717	1200	74.947	7.5696	, datetime is calculated from sample id		"10/10/2014,18:16:52"	35014	130506_Cracker_PBL	150.77	35.85	-9.4	-10.0792	-10.1057	0.0047275	-19.202	-19.0495	0.0066735	-13.5438	0.069355	0.20876	0.0087717	NaN	NaN	-25.5876	0.36179	-0.093457	0.047417	-83.5124	25.2573	-59.752	3.3445	60
	141010_4_ETH2	ajs	9.991	90.5715	600	2.0581	9.6188	-18.1369	1200	75.366	7.5434	, datetime is calculated from sample id		"10/10/2014,20:28:23"	35021	130506_Cracker_PBL	151.91	36.28	9.4	-10.0823	-10.1088	0.0046944	-19.2901	-19.1399	0.0067806	-13.6408	0.071164	0.20486	0.0089228	NaN	NaN	-25.7102	0.34072	-0.03969	0.045072	-68.9512	25.1759	-44.6382	3.3344	60
	141010_5_ETH2	ajs	7.684	90.5643	600	2.0168	8.1066	-18.6896	1200	57.392	7.469	, datetime is calculated from sample id		"10/10/2014,22:39:33"	35028	130506_Cracker_PBL	116.1	27.73	-18.3	-10.0903	-10.117	0.0047453	-19.2935	-19.1434	0.0084702	-13.5994	0.073659	0.26232	0.0090012	NaN	NaN	-25.1847	0.45688	0.50656	0.05962	-51.4537	38.6013	-26.6688	5.1123	60
	141010_6_ETH2	ajs	7.709	90.4298	600	2.1596	8.0241	-18.4766	1200	58.515	7.5905	, datetime is calculated from sample id		"10/11/2014,0:51:36"	35035	130506_Cracker_PBL	117.6	28.24	-15.1	-10.0862	-10.1128	0.0047669	-19.2913	-19.1411	0.0062582	-13.6491	0.06917	0.20123	0.0089381	NaN	NaN	-25.6112	0.36153	0.064387	0.04733	-77.0012	27.7546	-52.8926	3.6763	60
	141214_3_ETH2	andy	7.708	90.2222	600	4.6714	9.9136	-20.059	1200	57.712	7.4873			"12/14/2014,16:07:51"	39046	130506_Cracker_PBL	116.98	30.64	-6.7	-10.2006	-10.2287	0.0035969	-19.0319	-18.8173	0.0080574	-13.4988	0.067538	0.19612	0.0085547	NaN	NaN	-24.9626	0.42824	0.20196	0.055643	45.7588	31.2062	72.6361	4.1312	60
	141214_4_ETH2	andy	8.238	89.9188	600	4.6772	9.3616	-19.9817	1200	59.239	7.1909	pumped away residual		"12/14/2014,18:20:06"	39053	130506_Cracker_PBL	120.86	31.49	8.7	-10.2121	-10.2403	0.0046021	-19.0108	-18.7957	0.0076734	-13.4617	0.06295	0.22528	0.0080034	NaN	NaN	-25.1156	0.36392	0.0021328	0.047911	-44.748	24.4385	-20.2303	3.2353	60
	150306_1_ETH_2	randy	8.16	90.227	600	-8.071	22.63	-21.0849	1200	61.89	7.5846			"3/8/2015,12:49:30"	45036	150305_Cracker_PBL	125.98	30.72	-15.7	-10.1186	-10.1456	0.0044677	-19.0274	-18.5586	0.0066904	-13.3954	0.066526	0.21712	0.0086191	NaN	NaN	-25.1436	0.33301	0.0066292	0.043575	66.2404	45.3937	93.5437	6.0099	60
ETH3
	150319_1_ETH3	cps	7.464	90.287	600	-3.4665	20.6822	-21.6112	1200	54.642	7.3207			"3/19/2015,18:13:48"	45868	150305_Cracker_PBL	110.46	28.24	5	1.634	1.7606	0.0042889	-2.0196	-1.9658	0.0059281	16.0694	0.070721	0.65174	0.0090335	NaN	NaN	10.0556	0.45316	1.0829	0.057651	178.749	39.6423	154.362	5.0118	60
ETH4
Samples
	150119_4_hb18	egh	9.495	90.0349	600	2.7804	19.7846	-19.8472	1200	28.565	3.0084			"1/20/2015,17:22:58"	41692	130506_Cracker_PBL	58.5	16.36	-46.1	-6.3778	-6.3559	0.033568	-5.5216	-5.3313	0.061995	4.5213	0.15258	0.62997	0.011398	NaN	NaN	2.4506	0.66942	0.58392	0.085062	63.6236	41.0064	57.4483	5.2513	60
	150119_5_hb128	egh	10.807	90.1179	600	3.0061	1281.55	-20.1224	1200	36.413	3.3694			"1/20/2015,19:35:41"	41699	130506_Cracker_PBL	75	20.81	-10.7	-5.575	-5.5426	0.0047017	-5.2228	-5.0336	0.0076161	5.5992	0.08038	0.60754	0.0099044	NaN	NaN	2.9946	0.48268	0.52269	0.061609	69.8075	33.9777	62.0994	4.354	60
	150119_6_hb129	egh	8.914	90.0937	600	3.4661	25.5772	-20.098	1200	48.366	5.4258			"1/20/2015,21:48:36"	41706	130506_Cracker_PBL	99.52	27.73	53.9	-6.227	-6.2032	0.0053104	-4.9042	-4.7161	0.0073398	5.2999	0.07652	0.62369	0.0093587	NaN	NaN	3.672	0.47803	0.56106	0.060672	76.9541	39.2023	69.215	5.0233	60
	150120_3_hb30	egh	9.378	90.1422	600	-1.9445	16.3458	-20.4758	1200	51.388	5.4796			"1/21/2015,15:30:14"	41753	130506_Cracker_PBL	105.43	24.57	12	-5.9252	-5.8974	0.0045687	-5.4206	-5.2344	0.0062515	5.0276	0.081565	0.58321	0.010335	NaN	NaN	2.368	0.38195	0.29644	0.048624	53.3049	28.9467	46.5012	3.7123	60
	150120_4_d20	egh	10.093	89.9072	600	-2.2473	17.972	-20.3718	1200	53.768	5.3273			"1/21/2015,17:42:21"	41760	130506_Cracker_PBL	109.75	25.68	-1.5	-6.3604	-6.3383	0.0042819	-4.9017	-4.7188	0.0068106	5.1516	0.068166	0.603	0.0087074	NaN	NaN	3.3955	0.47348	0.28105	0.060617	48.979	31.9374	41.576	4.0933	60
	150120_5_hb47	egh	8.376	90.1206	600	-0.95581	16.0865	-20.1339	1200	45.016	5.3744			"1/21/2015,19:53:57"	41767	130506_Cracker_PBL	92.64	21.75	-2.3	-5.8579	-5.8292	0.0046426	-5.2011	-5.0192	0.0075484	5.3303	0.080945	0.59415	0.0098444	NaN	NaN	2.843	0.5601	0.32903	0.071421	66.3533	43.2759	58.9262	5.5469	60
	150120_6_hb162	egh	9.377	90.1471	600	-0.1275	21.7893	-20.8491	1200	52.14	5.5604			"1/21/2015,22:05:50"	41774	130506_Cracker_PBL	106.93	25.08	48.2	-8.2286	-8.2309	0.0054355	-7.6158	-7.4279	0.0072734	0.52091	0.069251	0.60349	0.0084394	NaN	NaN	-1.9136	0.50007	0.44109	0.064612	55.7814	35.7608	56.0606	4.6172	60
	150120_7_hb81	egh	8.16	90.0601	600	0.36064	14.1615	-19.965	1200	54.667	6.6994			"1/22/2015,0:17:44"	41781	130506_Cracker_PBL	113.37	26.36	0.6	-7.4689	-7.4613	0.0045704	-12.028	-11.8265	0.007507	-3.2934	0.078877	0.5778	0.0098961	NaN	NaN	-11.0408	0.35127	0.153	0.045689	8.3367	25.5896	16.8371	3.3309	60
	150120_8_hb187	egh	8.18	90.0622	600	-0.58309	11.5761	-19.623	1200	52.06	6.3643			"1/22/2015,2:29:27"	41788	130506_Cracker_PBL	111.07	25.42	1.1	-6.9063	-6.8913	0.0052632	-8.062	-7.8754	0.0078258	1.3443	0.065682	0.58474	0.0079193	NaN	NaN	-3.0422	0.44461	0.20187	0.05682	16.7193	28.8855	16.5394	3.7273	60
	150120_9_hb109	egh	9.062	90.019	600	1.7553	89.9546	-20.0495	1200	38.922	4.2951			"1/22/2015,4:40:29"	41795	130506_Cracker_PBL	78.61	18.76	10.7	-9.7837	-9.8063	0.0047732	-11.1511	-10.9544	0.01045	-4.6139	0.086445	0.62671	0.010387	NaN	NaN	-9.0041	0.59766	0.44863	0.075729	27.5069	47.475	36.7639	6.1817	60
	150120_10_hb18	egh	9.59	90.2021	600	2.4266	18.1569	-17.699	1200	49.445	5.1559			"1/22/2015,6:52:43"	41802	130506_Cracker_PBL	100.4	23.8	17.5	-6.6119	-6.5931	0.0047948	-5.5195	-5.3456	0.0074738	4.2884	0.074041	0.62522	0.0090407	NaN	NaN	2.1049	0.47269	0.23586	0.060091	49.8594	31.9227	44.0096	4.0969	60
	150121_2_hb128	egh	10.732	90.0778	600	-0.18907	562.211	-21.1121	1200	41.002	3.8205			"1/22/2015,14:15:53"	41824	130506_Cracker_PBL	83.47	19.87	21.8	-5.5406	-5.5078	0.004921	-5.0794	-4.9146	0.0073419	5.746	0.070413	0.57029	0.0086783	NaN	NaN	3.0014	0.52731	0.24122	0.067007	56.3295	36.98	48.3797	4.737	60
	150121_3_hb129	egh	8.985	89.8917	600	2.2867	22.2258	-20.581	1200	48.31	5.3767			"1/22/2015,16:28:08"	41831	130506_Cracker_PBL	99.34	23.46	27.8	-6.2397	-6.216	0.0064062	-4.8821	-4.721	0.01112	5.2872	0.079257	0.59922	0.0091728	NaN	NaN	3.5434	0.45433	0.38854	0.057442	63.8229	32.3688	56.1447	4.1466	60
	150121_4_hb30	egh	9.42	90.1248	600	3.7396	17.6204	-20.6517	1200	53.78	5.7091			"1/22/2015,18:40:13"	41838	130506_Cracker_PBL	109.75	26.02	11.1	-5.9228	-5.895	0.003819	-5.3741	-5.2133	0.006946	5.076	0.077522	0.58117	0.0097985	NaN	NaN	2.4363	0.32536	0.27128	0.0414	50.785	24.8305	43.8975	3.1841	60
	150121_5_d20	egh	10.128	89.9813	600	-0.99087	18.6196	-18.8957	1200	58.995	5.8249			"1/22/2015,20:51:59"	41845	130506_Cracker_PBL	120.86	28.59	2.7	-6.3642	-6.3422	0.0048446	-4.9173	-4.7616	0.0069278	5.1013	0.057606	0.57046	0.0072303	NaN	NaN	3.3074	0.34938	0.22459	0.044494	50.9763	27.375	43.5959	3.5083	60
	150121_6_hb47	egh	8.357	90.1491	600	4.1134	18.4106	-18.1459	1200	44.533	5.3288			"1/22/2015,23:03:16"	41852	130506_Cracker_PBL	90.96	21.66	-3.9	-5.8565	-5.8278	0.0036366	-5.1868	-5.0324	0.0079977	5.3828	0.070954	0.63314	0.0089241	NaN	NaN	3.3949	0.34153	0.85089	0.043367	172.356	22.3704	164.158	2.8669	60
	150121_7_hb162	egh	9.386	90.119	600	8.4171	25.8182	-21.1495	1200	52.055	5.546			"1/23/2015,1:15:35"	41859	130506_Cracker_PBL	110.01	25.59	1.8	-8.2854	-8.2885	0.0047388	-7.6212	-7.4556	0.0077282	0.43271	0.078653	0.57459	0.0098284	NaN	NaN	-2.0415	0.42951	0.32385	0.054625	35.0008	27.5725	35.345	3.5601	60
	150121_8_hb81	egh	8.178	89.9491	600	9.1062	16.9301	-20.0284	1200	54.268	6.6359			"1/23/2015,3:27:39"	41866	130506_Cracker_PBL	109.49	26.19	-5.2	-7.4896	-7.4823	0.005076	-12.0081	-11.8186	0.0078978	-3.2643	0.063604	0.60914	0.0078763	NaN	NaN	-10.7141	0.34278	0.44335	0.043814	27.5373	27.2991	36.1801	3.5526	60
	150121_9_hb187	egh	8.238	90.1245	600	8.7753	15.3699	-18.0864	1200	51.525	6.2546			"1/23/2015,5:39:36"	41873	130506_Cracker_PBL	104.9	25.08	31.8	-6.9216	-6.9068	0.0051641	-8.1093	-7.945	0.0087127	1.3436	0.085306	0.61249	0.010353	NaN	NaN	-2.5998	0.5665	0.74123	0.072316	95.9352	46.7407	95.8641	6.0322	60
	150211_7_D20	egh	10.503	90.2547	600	-0.76947	12.1673	-21.8529	1200	64.447	6.1361			"02/13/15,01:28:42"	43436	130506_Cracker_PBL	135.15	32.18	-4.5	-6.1716	-6.147	0.0045881	-4.7183	-4.5999	0.0071398	5.5239	0.062004	0.60019	0.0083264	NaN	NaN	3.8028	0.38277	0.31794	0.049928	45.1991	27.368	37.2433	3.5077	60
	150211_8_HB47	egh	8.649	90.892	600	-0.92018	11.544	-21.3764	1200	49.949	5.7751			"02/13/15,03:40:06"	43443	130506_Cracker_PBL	100.05	24.57	12	-5.6833	-5.6524	0.005047	-5.0332	-4.911	0.0070213	5.7122	0.073973	0.63371	0.0098527	NaN	NaN	3.1135	0.54236	0.2609	0.070498	47.1633	36.8313	39.3365	4.7207	60

## Sheet: 20170117T131357_ARF_Reduced
pollycompile.m - 170115 reduced filename: 20170117T131357_ARF_Reduced.txt
Created from log file: ClumpedSampleLog_RF_201503-201511_Brand.txt
Reference Materials:
	Accepted Values
	Name	d13C VPDB (permil)	d18O VPDB (permil)	D47 ARF (permil)	notes
	NBS19	1.95	-2.2	0.392	d13C and d18O as per CIAAW, D47 from Dennis et al. 2011
	C64	-2.05	-15.54	0.621	d13Cacc and d18Oacc from kiel_refmat_nist on 150223, D47 is from C64_Summary.xlsx on 150130
	Coral	-2.14	-4.5	0.718	d13Cacc and d18Oacc from kiel_refmat_nist on 150223, D47 is from C64_Summary.xlsx on 150130
	Polly CO2 Reference Gas	-10.3	-6.44	0.9
Absolute Reference Frame (ARF)
	Temperature (*C)	n	Slope	Intercept (D47 [EGvsWG]0)	r2	ETF slope	ETF intercept	ETF r2	ARF slope bootstrapped	ARF intercept bootstrapped
	4	19	-2.2973e-05	0.075198	-0.019378	1.0636	0.94028	0.99855	NaN	NaN
	60	17	-2.2973e-05	-0.1384	0.00012292	1.0636	0.94028	0.99855	NaN	NaN
	1000	46	-2.2973e-05	-0.86566	0.0096053	1.0636	0.94028	0.99855	NaN	NaN
Acid Correction Factor: 0
(if you want to use an acid fractionation correction use, acid = 0.082 Defliese_ChemGeol_2015)
D47 to Temperature equation: T_D47_ARF_acid = sqrt((4.17*10^4)./(D47_ARF_acid - 0.139)); Kelson et al. 2016 GCA equation 2, no acid correction
A note about VPDB values below - the columns labeled "vs VPDB (via WG)" are vs our working reference CO2 which was calibrated against NBS19.
The columns labeled "vs VPDB (formal)" are also vs the working reference CO2 but also corrected to current reference frame values of NBS19, LSVEC, and NBS18.
Individual Carbonates
	Sample ID	User	Mass (mg)	Acid temperature (C)	Reaction time (minutes)	Pre reaction Gauge 1 (mTorr)	Post reaction Gauge 1 (mTorr)	Mean GC transfer temperature (C)	Transfer time (minutes)	CO2 Pressure Gauge 2 (mbar)	CO2 yield (mbar/mg)	prep notes	labviewscript	Analysis Date	Starting analysis number	Polly Method	Multiport Pressure (mbar)	Bellows Pressure (mbar)	Pressure Adjust difference (mV)	d13C vs VPDB (via WG) (permil)	d13C vs VPDB (formal) (permil)	d13C stdev	d18O vs (via WG) (permil)	d18O vs VPDB (formal) (permil)	d18O stdev	d47 vs VPDB (via WG) (permil)	d47 stdev	D47 ARF acid (permil)	D47 stderr	D47 ARF acid bootstrapped (permil)	D47 BS unc	d48 vs VPDB (via WG) (permil)	d48 stdev	D48 (permil)	D48 stderr	d49 vs VPDB (via WG) (permil)	d49 stdev	D49 (permil)	D49 stderr	n	comments
NBS19
C64
	150324_1_C64	egh	8.115	90.3066	600	-7.1727	15.1742	-21.9016	1200	61.455	7.573	20 minute acid pump time	PollyPrepLine_1HourPrep.vi	"3/25/2015,12:52:16"	46245	150324_Cracker_PBL	125.45	29.7	14	-2.0692	-1.9695	0.004449	-16.0426	-15.6579	0.0057633	-2.1887	0.075146	0.54616	0.0096673	NaN	NaN	-18.9065	0.33356	0.27779	0.043906	71.8036	23.7925	83.745	3.1063	60	first sample of day excluded
	150414_1_C64	egh	8.317	89.9682	600	-11.9803	22.484	-20.5606	1200	61.222	7.3611		PollyPrepLine_1HourPrep.vi	"4/14/2015,20:08:14"	47683	150324_Cracker_PBL	125.01	28.84	-36.7	-2.1982	-2.1004	0.0040664	-15.9198	-15.6462	0.0073488	-2.1998	0.061621	0.53292	0.0079025	NaN	NaN	-18.9218	0.33081	0.013485	0.043454	29.2107	25.3773	40.5504	3.312	60	first sample of day excluded
	150501_1_C64	andy	8.608	90.0977	600	-13.4092	22.1969	-21.8037	1200	63.576	7.3857		PollyPrepLine_1HourPrep.vi	"5/2/2015,2:36:04"	48829	150324_Cracker_PBL	129.42	29.44	-20.7	-2.2315	-2.1341	0.0055037	-15.7764	-15.5405	0.0081983	-2.0719	0.0665	0.54636	0.0084498	NaN	NaN	-18.314	0.27138	0.34185	0.035791	83.4075	35.7252	95.0658	4.6621	60	first sample of day excluded
	150501_2_C64	andy	6.549	89.9264	600	-9.7385	1.1687	-21.7979	1200	48.352	7.3831		PollyPrepLine_1HourPrep.vi	"5/2/2015,4:56:11"	48836	150324_Cracker_PBL	101.11	22.52	-23.7	-2.2444	-2.1472	0.0043133	-15.8483	-15.6112	0.0077398	-2.1009	0.06159	0.60755	0.0082656	NaN	NaN	-18.3991	0.24623	0.4012	0.0322	1.7975	24.2704	12.7334	3.1678	60
	150509_1_C64	lkb	8.547	90.2177	600	-5.5243	21.5303	-21.4571	1200	64.093	7.4989		PollyPrepLine_1HourPrep.vi	"5/9/2015,22:50:29"	49337	150324_Cracker_PBL	129.16	29.27	-38.7	-2.2043	-2.1066	0.0039838	-15.8153	-15.5821	0.0068418	-2.1002	0.06811	0.53092	0.0088051	NaN	NaN	-18.4973	0.2735	0.23409	0.036318	136.564	45.0521	148.857	5.8797	60	first sample of day excluded
	150513_1_C64	karl	8.728	90.6321	600	-10.3911	19.0293	-21.7316	1200	66.437	7.6119		PollyPrepLine_1HourPrep.vi	"5/14/2015,9:24:12"	49643	150324_Cracker_PBL	134.54	30.38	-21.1	-2.2878	-2.1912	0.0049176	-15.6909	-15.4478	0.0086693	-2.062	0.066158	0.52126	0.0084466	NaN	NaN	-18.1517	0.22254	0.33395	0.02951	62.382	29.1543	73.6873	3.8046	60	first sample
	150513_9_C64	karl	8.63	90.1691	600	-6.8684	10.9822	-21.5871	1200	65.555	7.5962	standard, end of run	PollyPrepLine_1HourPrep.vi	"5/15/2015,5:00:02"	49699	150324_Cracker_PBL	131.71	30.04	11.6	-2.2934	-2.1969	0.0045118	-15.6122	-15.365	0.0064998	-1.9541	0.068312	0.55565	0.008795	NaN	NaN	-18.0428	0.25681	0.28511	0.033814	3.0949	30.011	13.6094	3.9155	60
	150526_5_C64	andy	8.02	90.1872	600	-5.8637	23.0718	-21.9595	1200	61.447	7.6617		PollyPrepLine_1HourPrep.vi	"5/26/2015,23:18:36"	50276	150324_Cracker_PBL	124.75	28.5	23.7	-2.1873	-2.0893	0.0045823	-15.511	-15.2769	0.0062781	-1.7095	0.053643	0.59552	0.0071815	NaN	NaN	-17.8716	0.27021	0.25368	0.03516	-4.2824	25.9769	5.8402	3.3878	60
	150601_1_C64	andy	6.465	90.2788	600	-12.923	10.7873	-21.7277	1200	48.165	7.4501		PollyPrepLine_1HourPrep.vi	"06/01/15,20:16:26"	50676	150324_Cracker_PBL	97.49	23.12	-5.6	-2.2357	-2.1384	0.0043986	-15.8886	-15.6582	0.0060601	-2.2114	0.068742	0.52499	0.0087754	NaN	NaN	-18.5764	0.25525	0.30231	0.033696	99.9331	36.6276	112.028	4.7807	60	first sample of day excluded
	150601_3_C64	andy	7.483	90.3511	600	-8.9029	0.99356	-21.792	1200	56.071	7.4931		PollyPrepLine_1HourPrep.vi	"06/02/15,01:38:48"	50690	150324_Cracker_PBL	113.72	26.96	-16.8	-2.231	-2.1336	0.0060842	-15.8271	-15.5982	0.0075663	-2.0703	0.073736	0.60305	0.0095044	NaN	NaN	-18.6485	0.26539	0.10393	0.035186	-18.8084	32.1047	-8.1547	4.1899	60
	150604_4_C64	andy	7.222	90.4764	600	-3.3422	4.6382	-21.2166	1200	53.77	7.4453	porapaq wrapped with foil during bake	PollyPrepLine_1HourPrep.vi	"6/5/2015,2:41:43"	50892	150324_Cracker_PBL	108.52	25.42	-53.8	-2.2283	-2.1309	0.0041184	-15.8498	-15.6256	0.0062914	-2.124	0.065245	0.56796	0.0084952	NaN	NaN	-18.5998	0.27473	0.19968	0.036134	-13.9768	31.8065	-3.2271	4.1515	60
	150604_5_C64	plu	5.904	90.4471	600	-4.9121	3.4216	-21.8078	1200	43.9	7.4356		PollyPrepLine_1HourPrep.vi	"6/5/2015,5:07:41"	50899	150324_Cracker_PBL	88.32	20.81	-22.8	-2.2297	-2.1323	0.0045202	-15.8461	-15.6222	0.0080558	-2.1057	0.066045	0.58486	0.0087189	NaN	NaN	-18.549	0.28623	0.24394	0.037607	8.3806	44.0242	19.3691	5.7454	60
	150604_6_C64	plu	8.15	90.3376	600	-4.2845	85.902	-21.8005	1200	60.3	7.3988		PollyPrepLine_1HourPrep.vi	"6/5/2015,7:43:35"	50906	150324_Cracker_PBL	121.31	28.41	-21.7	-2.2264	-2.129	0.0053758	-15.8612	-15.6372	0.0091704	-2.1244	0.073037	0.57811	0.0093846	NaN	NaN	-18.7061	0.26798	0.11452	0.035442	-14.1301	27.0977	-3.3609	3.5368	60
	150604_7_C64	plu	5.73	90.4294	600	-4.7325	9.2012	-21.7955	1200	42.3	7.3822		PollyPrepLine_1HourPrep.vi	"6/5/2015,10:03:56"	50913	150324_Cracker_PBL	87.79	20.29	7.2	-2.2304	-2.133	0.0052589	-15.8972	-15.6728	0.0058185	-2.1698	0.06092	0.57347	0.0076979	NaN	NaN	-18.6404	0.25873	0.2546	0.034104	3.6716	29.1396	14.7147	3.8035	60
	150605_1_C64	andy	7.124	90.3464	600	-2.9423	6.4176	-20.5475	1200	52.042	7.3052		PollyPrepLine_1HourPrep.vi	"6/5/2015,13:19:58"	50922	150324_Cracker_PBL	107.19	25.25	17.2	-2.2229	-2.1254	0.0046724	-15.8498	-15.6265	0.0078653	-2.1447	0.063019	0.54035	0.0083283	NaN	NaN	-18.6166	0.24384	0.18261	0.032644	82.3174	33.1016	94.1176	4.321	60	first sample of day excluded
	150609_2_C64	krh	6.946	90.2893	600	-0.032068	11.2054	-21.5053	1200	51.075	7.3532		PollyPrepLine_1HourPrep.vi	"06/09/15,19:48:53"	51202	150324_Cracker_PBL	104.99	24.74	-31.1	-2.1964	-2.0985	0.0048569	-15.8921	-15.6683	0.007691	-2.1186	0.066894	0.5872	0.008543	NaN	NaN	-18.41	0.25851	0.47877	0.034302	7.0307	28.4494	18.0656	3.7138	60
	150616_4_C64	egh	8.456	90.5541	600	-2.8622	8.6544	-20.9292	1200	64.945	7.6803		PollyPrepLine_1HourPrep.vi	"6/17/2015,0:19:08"	51686	150324_Cracker_PBL	130.74	29.61	14.7	-2.1884	-2.0904	0.0040224	-15.9406	-15.7225	0.0080969	-2.1572	0.066385	0.591	0.0086677	NaN	NaN	-18.7935	0.25806	0.18644	0.034022	-16.7474	26.8615	-5.8849	3.5063	60
	150618_8_C64	jrk	6.425	90.3626	600	-2.0796	6.3467	-21.3225	1200	47.913	7.4573		PollyPrepLine_1HourPrep.vi	"6/19/2015,11:58:58"	51863	150324_Cracker_PBL	96.7	22.18	-13	-2.2493	-2.1522	0.0048669	-15.9166	-15.7079	0.0074156	-2.2007	0.059104	0.58135	0.0076563	NaN	NaN	-18.6769	0.25856	0.25688	0.033709	-17.4554	27.7716	-6.5882	3.6247	60
	150623_2_C64	plu	6.24	90.5228	600	-5.1951	8.1382	-21.3942	1200	46.8	7.5		PollyPrepLine_1HourPrep.vi	"6/23/2015,18:50:34"	52150	150324_Cracker_PBL	95.28	21.58	-114.7	-2.1945	-2.0966	0.0057894	-15.8976	-15.6899	0.0087375	-2.0888	0.062151	0.62306	0.0080993	NaN	NaN	-18.6934	0.27429	0.20118	0.035784	-9.6828	28.0474	1.177	3.6606	60
	150623_9_C64	plu	8.13	90.4489	600	-3.1868	8.8297	-21.1908	1200	59.9	7.3678		PollyPrepLine_1HourPrep.vi	"6/24/2015,11:48:17"	52199	150324_Cracker_PBL	120.07	27.47	17	-2.1933	-2.0954	0.0050073	-15.8534	-15.6522	0.0070691	-2.0572	0.059288	0.60695	0.0076977	NaN	NaN	-18.5521	0.22636	0.25549	0.029631	-11.0158	24.9281	-0.26155	3.2534	60
	150624_9_C64	plu	8.2	90.59	600	-0.13104	10.7932	-21.0688	1200	61.6	7.5122		PollyPrepLine_1HourPrep.vi	"06/25/15,10:37:38"	52259	150324_Cracker_PBL	123.16	28.16	17.7	-2.1982	-2.1004	0.0048631	-15.8601	-15.6621	0.0083548	-2.0708	0.060669	0.60486	0.0077814	NaN	NaN	-18.6473	0.28497	0.17198	0.037293	-19.3381	28.145	-8.6567	3.6734	60
	150625_1_C64_COND	plu	7.86	90.2691	600	-4.213	44.0213	-20.4302	1200	59	7.5064		PollyPrepLine_1HourPrep.vi	"6/25/2015,16:30:03"	52272	150324_Cracker_PBL	119.63	27.22	-16.6	-2.1786	-2.0805	0.0041645	-15.8502	-15.6526	0.0077909	-2.109	0.053477	0.53304	0.0070979	NaN	NaN	-18.5205	0.29598	0.28104	0.038538	64.5023	29.5361	76.0597	3.8542	60	conditioner
	150625_8_C64	plu	6.31	90.3517	600	-1.3577	11.806	-21.1552	1200	46.9	7.4326		PollyPrepLine_1HourPrep.vi	"6/26/2015,9:26:25"	52321	150324_Cracker_PBL	93.96	21.66	-23.8	-2.1978	-2.1	0.0044386	-15.8344	-15.6395	0.0075567	-2.0615	0.064545	0.58624	0.0082291	NaN	NaN	-18.4685	0.21521	0.30211	0.028255	6.9277	26.2387	17.8436	3.4242	60
	150623_1_C64_cndtr	plu	5.89	90.4565	600	-9.289	24.9809	-21.1207	1200	43.9	7.4533		PollyPrepLine_1HourPrep.vi	"6/26/2015,11:50:52"	52328	150324_Cracker_PBL	88.85	20.38	-144.6	-2.1864	-2.0884	0.0044869	-15.8771	-15.6823	0.0061718	-2.1289	0.062665	0.54939	0.0082149	NaN	NaN	-18.3711	0.26301	0.48796	0.034546	132.907	38.2659	145.283	4.9939	60	first sample of day excluded
	150624_1_C64_COND	plu	7.94	90.5196	600	-7.9006	35.3977	-21.8417	1200	59.3	7.4685		PollyPrepLine_1HourPrep.vi	"6/26/2015,14:08:17"	52335	150324_Cracker_PBL	119.1	27.3	20.8	-2.1791	-2.081	0.0041058	-15.864	-15.6696	0.0056127	-2.1359	0.064319	0.52008	0.0081446	NaN	NaN	-18.5671	0.27154	0.26163	0.035856	71.2751	23.2069	82.9375	3.029	60	first sample of day excluded
	150714_2_C64	andy	7.842	90.6452	600	-5.9243	5.4635	-21.5071	1200	59.678	7.61		PollyPrepLine_1HourPrep.vi	"7/14/2015,21:38:36"	52937	150324_Cracker_PBL	120.6	29.1	-83.2	-2.1588	-2.0604	0.004818	-15.6869	-15.5432	0.0066447	-1.8914	0.060525	0.56526	0.0079376	NaN	NaN	-18.505	0.24888	-0.034709	0.032745	-206.443	1130.95	-198.125	147.548	60
	150713_2_C64	andy	6.906	90.4948	600	-7.094	2.8199	-21.7169	1200	50.376	7.2945		PollyPrepLine_1HourPrep.vi	"7/15/2015,10:35:07"	52972	150324_Cracker_PBL	100.67	24.57	-99.5	-2.1623	-2.064	0.010227	-15.6401	-15.5258	0.02051	-1.8353	0.099063	0.57725	0.010317	NaN	NaN	-18.3857	0.49127	-0.0082199	0.060957	9.3522	63.5007	19.8586	8.2894	60
	150715_2_C64	andy	6.282	90.4653	600	-3.3889	5.482	-21.684	1200	47.321	7.5328		PollyPrepLine_1HourPrep.vi	"7/16/2015,15:04:56"	53050	150324_Cracker_PBL	94.67	23.03	-7.1	-2.1614	-2.063	0.0047297	-15.6983	-15.5649	0.0075235	-1.8783	0.071615	0.59444	0.0093467	NaN	NaN	-18.4764	0.21789	0.017616	0.028832	-0.063315	3.5088	10.4602	0.45755	60
	150716_2_C64	andy	6.212	90.4906	600	-5.84	4.3613	-20.7846	1200	47.185	7.5958		PollyPrepLine_1HourPrep.vi	"7/18/2015,7:14:06"	53155	150324_Cracker_PBL	94.49	22.77	-60.9	-2.1493	-2.0508	0.0043632	-15.6953	-15.4997	0.0069395	-1.8919	0.066752	0.56413	0.0086636	NaN	NaN	-18.3159	0.26841	0.17492	0.035634	-8.582	19.9861	1.833	2.6078	60
	150720_2_C64	arl	6.86	90.0743	600	-7.3972	38.2008	-21.3297	1200	50.9	7.4198		PollyPrepLine_1HourPrep.vi	"7/20/2015,18:03:26"	53317	150324_Cracker_PBL	102.87	24.06	2.7	-2.145	-2.0464	0.0048065	-15.8171	-15.6015	0.0063057	-1.9882	0.07047	0.5908	0.008984	NaN	NaN	-18.5614	0.26718	0.17206	0.035084	2.6454	23.5547	13.4253	3.0737	60
	150722_2_C64	plu	6.05	89.9591	600	-2.264	12.0365	-20.7118	1200	45.5	7.5207		PollyPrepLine_1HourPrep.vi	"7/22/2015,17:50:49"	53438	150324_Cracker_PBL	90.96	21.49	13.2	-2.1333	-2.0345	0.0049855	-15.7385	-15.5138	0.0064447	-1.9335	0.060231	0.5508	0.0078105	NaN	NaN	-18.2862	0.26634	0.29291	0.034742	26.7141	24.2379	37.5765	3.1619	60
	150723_2_C64	plu	5.95	89.9135	600	-4.6445	14.1185	-20.9328	1200	42.9	7.2101		PollyPrepLine_1HourPrep.vi	"07/23/15,20:40:23"	53511	150324_Cracker_PBL	85.85	20.21	-160.9	-2.1136	-2.0146	0.0042913	-15.6265	-15.3992	0.0072722	-1.7962	0.067954	0.5538	0.0085578	NaN	NaN	-18.0725	0.30402	0.28307	0.038983	46.3157	26.6407	57.1255	3.4747	60
	150730_3_C64	andy	8.466	89.9779	600	3.991	9.9402	-21.0801	1200	65.081	7.6873		PollyPrepLine_1HourPrep.vi	"7/30/2015,13:30:59"	53971	150324_Cracker_PBL	131.45	29.61	40.4	-2.0954	-1.9961	0.0052721	-15.9784	-15.7318	0.0077514	-2.1357	0.07376	0.55927	0.009379	NaN	NaN	-18.8174	0.26641	0.23846	0.034534	-12.7705	26.169	-1.8805	3.4163	60
	150730_1_C64	andy	8.735	90.1752	600	-2.2168	19.1436	-21.6138	1200	63.622	7.2836	two CO2 injections went through porapaq prior to this sample	PollyPrepLine_1HourPrep.vi	"7/30/2015,18:24:18"	53985	150324_Cracker_PBL	128.27	29.1	6.3	-2.108	-2.0089	0.0036276	-15.9938	-15.7466	0.0078567	-2.18	0.06652	0.54204	0.0087191	NaN	NaN	-18.6834	0.28905	0.40634	0.038322	110.253	24.9769	122.558	3.2604	60
	150729_2_C64	andy/lkb	8.004	90.337	600	-1.4498	9.9774	-21.7497	1200	59.401	7.4214	first sample after CO2 "conditioner"	PollyPrepLine_1HourPrep.vi	"7/30/2015,20:41:00"	53992	150324_Cracker_PBL	119.98	27.22	-17	-2.0959	-1.9966	0.0038587	-15.9807	-15.7332	0.0064487	-2.1448	0.057821	0.5527	0.0073785	NaN	NaN	-18.8151	0.23493	0.2455	0.031013	-0.27111	21.7329	10.7629	2.8365	60
	150729_1_C64	andy/lkb	8.539	90.2691	600	-1.2869	200.604	-21.8652	1200	63.642	7.4531	first sample after CO2 "conditioner"	PollyPrepLine_1HourPrep.vi	"7/30/2015,23:02:35"	53999	150324_Cracker_PBL	127.74	28.93	-20.2	-2.1159	-2.0169	0.0048776	-16.0255	-15.777	0.0058329	-2.234	0.068665	0.52747	0.0087534	NaN	NaN	-18.9106	0.25739	0.23928	0.034114	68.958	19.5547	80.8809	2.5528	60
	150731_2_C64	andy	6.41	89.9594	600	3.2994	9.8757	-20.7938	1200	47.873	7.4685		PollyPrepLine_1HourPrep.vi	"8/1/2015,1:03:19"	54081	150324_Cracker_PBL	96.78	22	3.8	-2.1243	-2.0254	0.0042086	-15.9913	-15.7413	0.0080016	-2.1641	0.071277	0.573	0.0090732	NaN	NaN	-18.7809	0.25218	0.30201	0.033217	7.5156	19.8909	18.6871	2.5963	60
	150731_1_C64	andy	6.015	90.1205	600	-2.5013	11.0666	-21.2169	1200	45.047	7.4891		PollyPrepLine_1HourPrep.vi	"8/1/2015,3:40:11"	54088	150324_Cracker_PBL	90.96	20.72	-89.8	-2.122	-2.0231	0.0045884	-15.9677	-15.7175	0.0071848	-2.1639	0.064576	0.545	0.008089	NaN	NaN	-18.6043	0.24027	0.43404	0.031771	136.659	26.011	149.213	3.3949	60
	150803_2_C64	andy	6.028	90.1056	600	4.8478	10.3079	-21.2266	1200	45.666	7.5756		PollyPrepLine_1HourPrep.vi	"8/3/2015,21:01:06"	54280	150324_Cracker_PBL	91.32	20.89	-175.3	-2.1334	-2.0346	0.0042454	-16.0301	-15.7676	0.0082022	-2.2514	0.070663	0.53198	0.0090746	NaN	NaN	-19.0252	0.29037	0.13171	0.03795	-7.6902	23.2441	3.3997	3.0342	60
	150803_1_C64	andy	6.151	89.9973	600	-2.4139	12.1215	-21.6223	1200	46.231	7.516		PollyPrepLine_1HourPrep.vi	"8/3/2015,23:35:03"	54287	150324_Cracker_PBL	93.08	21.24	-9.5	-2.1266	-2.0278	0.0052377	-16.0195	-15.7567	0.0077909	-2.22	0.059837	0.54674	0.0076673	NaN	NaN	-18.7965	0.2863	0.34339	0.037689	88.5708	24.5028	100.712	3.1989	60
	150804_1_C64	cps	6.851	89.9231	600	3.1273	30.8073	-21.4512	1200	50.084	7.3105		PollyPrepLine_1HourPrep.vi	"8/4/2015,17:20:26"	54338	150324_Cracker_PBL	100.67	22.86	-4	-2.1356	-2.0369	0.0045343	-15.9613	-15.6967	0.0080024	-2.175	0.061967	0.54014	0.0082459	NaN	NaN	-18.7398	0.23617	0.28289	0.030807	49.147	25.9513	60.7301	3.3869	60
	150804_2_C64	cps	5.879	89.9296	600	4.8909	13.4367	-21.5859	1200	44.444	7.5598		PollyPrepLine_1HourPrep.vi	"8/4/2015,19:57:36"	54345	150324_Cracker_PBL	89.29	20.38	-17.2	-2.1302	-2.0314	0.0045187	-15.9734	-15.7083	0.0058762	-2.1927	0.059816	0.52909	0.0079162	NaN	NaN	-18.7187	0.30367	0.32909	0.040144	41.9024	27.0265	53.4255	3.5278	60
	150805_1_C64	andy	6.105	89.8358	600	3.8935	25.5899	-21.7529	1200	45.919	7.5215	no conditioner prior to this sample, only flamed tube	PollyPrepLine_1HourPrep.vi	"8/5/2015,16:05:51"	54403	150324_Cracker_PBL	92.81	21.24	10.8	-2.1247	-2.0258	0.0045	-16.0233	-15.755	0.006729	-2.2291	0.064137	0.53924	0.008182	NaN	NaN	-18.744	0.30401	0.40453	0.039669	117.254	27.5896	129.724	3.6018	60
	150805_2_C64	andy	6.486	89.9521	600	7.9774	12.6749	-20.2615	1200	48.743	7.5151		PollyPrepLine_1HourPrep.vi	"8/5/2015,18:31:13"	54410	150324_Cracker_PBL	98.9	22.52	-139.2	-2.122	-2.0231	0.004698	-15.9847	-15.7165	0.0073483	-2.1893	0.065244	0.5365	0.0084793	NaN	NaN	-18.8622	0.28969	0.20564	0.038094	9.6602	31.2565	20.8394	4.0801	60
	150810_1_C64	cps	6.151	90.1586	600	-16.4772	11.0925	-20.4611	1200	44.574	7.2466		PollyPrepLine_1HourPrep.vi	"8/10/2015,17:56:17"	54759	150324_Cracker_PBL	89.37	20.55	15.6	-2.0958	-1.9965	0.0041737	-16.0058	-15.7302	0.0063296	-2.1865	0.067682	0.53569	0.0089818	NaN	NaN	-18.7983	0.28934	0.31353	0.038131	60.688	28.7546	72.4535	3.7538	60	first sample, high 49
	150810_2_C64	cps	6.613	90.048	600	-2.5326	10.2936	-21.427	1200	47.604	7.1985		PollyPrepLine_1HourPrep.vi	"8/10/2015,20:18:57"	54766	150324_Cracker_PBL	95.64	21.83	-10.1	-2.0984	-1.9992	0.0041063	-16.0187	-15.7427	0.0074346	-2.1528	0.047734	0.58845	0.0060944	NaN	NaN	-18.8633	0.23361	0.27351	0.030628	3.0538	17.2596	14.2056	2.2533	60
	150811_1_C64	andy	10.086	89.9692	600	-15.2286	81.6282	-21.3998	1200	74.369	7.3735	no bake-out last night, no more CO2 injection port	PollyPrepLine_1HourPrep.vi	"08/11/15,17:54:01"	54828	150324_Cracker_PBL	149.35	33.71	-20.8	-2.0861	-1.9867	0.0041532	-16.0432	-15.7654	0.0074901	-2.2123	0.065193	0.53921	0.0083955	NaN	NaN	-18.826	0.28408	0.36124	0.037471	26.1749	21.3378	37.624	2.7855	60
	150811_2_C64	andy	9.767	89.9568	600	-3.0778	8.597	-21.5654	1200	72.581	7.4312		PollyPrepLine_1HourPrep.vi	"08/11/15,20:12:35"	54835	150324_Cracker_PBL	146.09	32.94	19	-2.0716	-1.972	0.0037513	-15.9721	-15.6949	0.0077103	-2.1167	0.067744	0.54794	0.0090537	NaN	NaN	-18.8387	0.28002	0.20376	0.036811	-2.7192	21.2394	8.2452	2.7722	60
	150811_3_C64	andy	10.192	90.0016	600	-0.63338	8.3706	-20.2555	1200	75.044	7.363		PollyPrepLine_1HourPrep.vi	"08/11/15,22:31:46"	54842	150324_Cracker_PBL	150.85	33.97	11.8	-2.072	-1.9724	0.0047146	-16.0186	-15.7406	0.0067433	-2.1798	0.052358	0.53227	0.0067238	NaN	NaN	-18.8297	0.28989	0.30754	0.038286	16.4247	23.8274	27.6984	3.1101	60
	150811_4_C64	andy	11.009	90.0512	600	-0.2846	7.4407	-20.8792	1200	75.259	6.8361		PollyPrepLine_1HourPrep.vi	"08/12/15,00:48:38"	54849	150324_Cracker_PBL	157.2	35.42	13.2	-2.0684	-1.9687	0.0054138	-16.0331	-15.7546	0.0080814	-2.1864	0.05088	0.53743	0.0065599	NaN	NaN	-18.8562	0.27906	0.30994	0.036816	3.4835	22.5415	14.6392	2.9431	60
	150811_5_C64	andy	9.536	90.1456	600	-44.2894	-3.9151	-19.9379	1200	70.912	7.4362		PollyPrepLine_1HourPrep.vi	"08/12/15,03:02:23"	54856	150324_Cracker_PBL	140.18	31.75	43.5	-2.0709	-1.9713	0.0037882	-16.0154	-15.7369	0.0072544	-2.1649	0.059583	0.54349	0.0076849	NaN	NaN	-18.768	0.25392	0.36391	0.033361	55.5689	22.6755	67.2713	2.9602	60
	150811_6_C64	andy	9.193	89.9949	600	-11.2765	0.50865	-20.5576	1200	66.97	7.2849		PollyPrepLine_1HourPrep.vi	"08/12/15,05:15:02"	54863	150324_Cracker_PBL	133.57	30.21	42.3	-2.0712	-1.9716	0.0043666	-16.038	-15.759	0.0070784	-2.1942	0.061463	0.5373	0.0080086	NaN	NaN	-18.8682	0.29076	0.30751	0.038507	55.6121	20.6608	67.3642	2.6971	60
	150811_7_C64	andy	7.99	89.6821	600	-13.273	-0.86682	-20.3786	1200	59.12	7.3992		PollyPrepLine_1HourPrep.vi	"08/12/15,07:33:08"	54870	150324_Cracker_PBL	121.39	27.13	3.7	-2.0689	-1.9692	0.0051092	-15.9856	-15.707	0.0071828	-2.1151	0.06487	0.56177	0.0082508	NaN	NaN	-18.382	0.29226	0.69674	0.038226	96.8087	22.2697	108.901	2.9068	60
	150811_8_C64	andy	6.383	90.0033	600	-14.5021	-4.9736	-20.618	1200	46.731	7.3212		PollyPrepLine_1HourPrep.vi	"08/12/15,09:59:37"	54877	150324_Cracker_PBL	92.99	21.41	-24.5	-2.1014	-2.0022	0.0039411	-16.04	-15.7604	0.0064811	-2.241	0.062278	0.52094	0.0082281	NaN	NaN	-18.8426	0.31925	0.33794	0.041691	54.5605	28.0946	66.3377	3.6672	60
	150813_1_C64	andy	7.42	90.3874	600	-3.7454	10.9084	-21.0599	1200	54.502	7.3453		PollyPrepLine_1HourPrep.vi	"8/13/2015,18:01:35"	54971	150324_Cracker_PBL	109.4	24.82	13	-2.0693	-1.9696	0.0046455	-16.0354	-15.7529	0.0063257	-2.1991	0.061874	0.52731	0.0078875	NaN	NaN	-18.8221	0.2683	0.34918	0.035319	30.6237	25.2062	42.0885	3.2907	60
	150813_2_C64	andy	10.223	90.391	600	7.962	14.0932	-21.2719	1200	70.812	6.9267		PollyPrepLine_1HourPrep.vi	"8/13/2015,20:25:18"	54978	150324_Cracker_PBL	141.86	32.18	12.2	-2.0649	-1.9652	0.0042425	-15.9981	-15.7158	0.0072797	-2.1685	0.060611	0.51444	0.007943	NaN	NaN	-18.8601	0.23202	0.23482	0.030539	-1.3394	21.6709	9.6869	2.8289	60
	150814_2_C64	andy	6.052	90.036	600	5.6766	15.2666	-20.7081	1200	44.018	7.2733		PollyPrepLine_1HourPrep.vi	"8/15/2015,3:26:53"	55064	150324_Cracker_PBL	91.4	20.81	-10.3	-2.0775	-1.978	0.0040772	-15.9602	-15.6761	0.0079264	-2.1378	0.059511	0.51873	0.0076989	NaN	NaN	-18.7474	0.27228	0.27274	0.036156	36.5269	18.777	47.9065	2.4501	60
	150814_1_C64	andy	6.053	90.1924	600	-7.5083	92.7119	-21.2619	1200	44.561	7.3618		PollyPrepLine_1HourPrep.vi	"8/15/2015,5:45:50"	55071	150324_Cracker_PBL	92.99	20.81	13.4	-2.0909	-1.9915	0.0035765	-15.9565	-15.6723	0.0064872	-2.1108	0.062098	0.55715	0.0078618	NaN	NaN	-18.4386	0.25593	0.57994	0.033968	161.737	23.1814	174.506	3.0261	60	high D49
	150817_2_C64	andy	7.998	89.9641	600	-15.7186	1.805	-20.9926	1200	59.478	7.4366		PollyPrepLine_1HourPrep.vi	"8/17/2015,23:09:32"	55262	150324_Cracker_PBL	122.28	27.73	-34.5	-2.1233	-2.0244	0.0041929	-15.8071	-15.522	0.0062366	-2.0057	0.052654	0.5388	0.0066314	NaN	NaN	-18.3907	0.25	0.32559	0.032952	62.9898	24.2092	74.3772	3.1587	60
	150817_1_C64	andy	8.016	90.2542	600	-31.3848	37.3791	-20.6623	1200	57.532	7.1771		PollyPrepLine_1HourPrep.vi	"8/18/2015,1:34:28"	55269	150324_Cracker_PBL	119.28	26.96	-12.9	-2.1367	-2.038	0.0046271	-15.9268	-15.6391	0.0066812	-2.1261	0.063221	0.55575	0.0081173	NaN	NaN	-18.5928	0.24592	0.36291	0.032732	79.3729	24.7577	91.2167	3.2312	60	highish D49
	150818_2_C64	andy	8.101	90.0652	600	-32.4116	-6.8198	-20.1198	1200	53.723	6.6317	lowish yield	PollyPrepLine_1HourPrep.vi	"8/18/2015,21:05:36"	55323	150324_Cracker_PBL	106.4	25.25	79.9	-2.1192	-2.0202	0.0050007	-15.9517	-15.6623	0.0095608	-2.1317	0.072924	0.55888	0.0093394	NaN	NaN	-18.8277	0.39088	0.17376	0.050868	-12.0768	24.6182	-1.2096	3.2124	60
	150818_1_C64	andy	7.93	89.9479	600	-35.0662	42.4812	-21.0966	1200	60.056	7.5733		PollyPrepLine_1HourPrep.vi	"8/18/2015,23:37:53"	55330	150324_Cracker_PBL	119.19	27.99	1.3	-2.1114	-2.0123	0.0052134	-15.9814	-15.6912	0.0068701	-2.1545	0.060505	0.55914	0.0077867	NaN	NaN	-18.6704	0.48821	0.39449	0.063832	53.2404	30.1698	64.8866	3.9377	60
	150819_1_C64	andy	8.103	90.1941	600	-37.0664	52.7801	-20.3029	1200	60.941	7.5208		PollyPrepLine_1HourPrep.vi	"8/19/2015,13:42:40"	55370	150324_Cracker_PBL	123.51	29.18	41.3	-2.1096	-2.0105	0.0044008	-15.9623	-15.6715	0.0081976	-2.1307	0.058988	0.56163	0.0076759	NaN	NaN	-18.656	0.28882	0.37036	0.037659	33.8839	25.7127	45.2725	3.3566	60
	150819_2_C64	andy	7.936	90.1847	600	-3.7212	6.7977	-21.1186	1200	59.314	7.474		PollyPrepLine_1HourPrep.vi	"8/19/2015,16:00:53"	55377	150324_Cracker_PBL	120.6	28.5	-18.9	-2.0983	-1.999	0.0044223	-15.9185	-15.6282	0.0071935	-2.0534	0.065576	0.5843	0.0087639	NaN	NaN	-18.663	0.25349	0.27411	0.033334	-8.2331	20.2882	2.5882	2.648	60
	150820_2_C64	andy	8.032	90.0525	600	-3.2067	6.1522	-20.4612	1200	60.352	7.5139		PollyPrepLine_1HourPrep.vi	"08/21/15,02:17:24"	55473	150324_Cracker_PBL	121.83	28.59	20	-2.0766	-1.977	0.0035912	-15.8436	-15.5519	0.007897	-1.939	0.065754	0.60143	0.008544	NaN	NaN	-18.4759	0.24482	0.31261	0.032381	-13.0292	22.1604	-2.434	2.8918	60
	150820_1_C64	andy	8.054	89.9194	600	-7.7992	42.3149	-21.7494	1200	60.206	7.4753		PollyPrepLine_1HourPrep.vi	"08/21/15,04:45:03"	55480	150324_Cracker_PBL	125.63	28.67	1.1	-2.0856	-1.9862	0.0045645	-15.9158	-15.6224	0.0070279	-2.0844	0.065067	0.53512	0.0084677	NaN	NaN	-18.6356	0.25912	0.29659	0.034083	33.8483	20.9319	45.1126	2.7321	60
	150821_1_C64	andy	7.982	90.0651	600	-10.8136	49.2158	-21.6532	1200	60.445	7.5727		PollyPrepLine_1HourPrep.vi	"8/23/2015,15:06:30"	55644	150324_Cracker_PBL	122.1	28.33	-38.9	-2.0958	-1.9965	0.0045133	-15.7825	-15.4915	0.017114	-1.9478	0.071505	0.54497	0.0089039	NaN	NaN	-18.2839	0.4259	0.38444	0.052539	20.9492	23.4579	31.8033	3.0596	60
	150821_2_C64	andy	7.902	90.0109	600	-4.9054	11.7428	-20.4452	1200	59.749	7.5613		PollyPrepLine_1HourPrep.vi	"8/23/2015,17:32:57"	55651	150324_Cracker_PBL	121.13	27.99	35.7	-2.0992	-2	0.0048819	-15.7435	-15.4531	0.021263	-1.8979	0.056214	0.55894	0.0076452	NaN	NaN	-18.0949	0.48408	0.49782	0.059081	14.5765	24.4354	25.2845	3.1851	60
	150825_1_C64	andy	8.062	90.1227	600	-13.1191	57.5364	-21.1389	1200	60.04	7.4473		PollyPrepLine_1HourPrep.vi	"08/26/15,08:35:12"	55813	150324_Cracker_PBL	122.01	27.82	5.2	-2.1379	-2.0392	0.0041926	-15.9929	-15.6938	0.006078	-2.2344	0.062779	0.51393	0.0081494	NaN	NaN	-18.717	0.24055	0.37045	0.031829	75.4853	18.0303	87.4333	2.3536	60
	150825_2_C64	andy	8.078	89.9968	600	-8.8404	5.1733	-21.2408	1200	58.667	7.2626		PollyPrepLine_1HourPrep.vi	"08/26/15,11:02:50"	55820	150324_Cracker_PBL	119.01	27.3	12.8	-2.1476	-2.0491	0.0034273	-15.9769	-15.6779	0.0068697	-2.1968	0.063272	0.54648	0.0081171	NaN	NaN	-18.7042	0.23131	0.35091	0.030474	42.0745	18.8351	53.6252	2.459	60
	150826_2_C64	krh	7.561	89.9345	600	-5.0749	9.3712	-21.6455	1200	56.22	7.4355		PollyPrepLine_1HourPrep.vi	"08/27/15,10:03:26"	55886	150324_Cracker_PBL	112.93	25.85	-18.4	-2.1497	-2.0512	0.0038784	-15.8494	-15.5505	0.0081309	-2.0445	0.055693	0.57101	0.0073125	NaN	NaN	-18.5849	0.23318	0.21374	0.030926	9.2449	15.6879	20.1678	2.0476	60
	150827_2_C64	krh	7.75	90.1039	600	-3.8484	12.2344	-20.9905	1200	57.512	7.4209		PollyPrepLine_1HourPrep.vi	"8/28/2015,11:09:52"	55956	150324_Cracker_PBL	115.92	26.36	-114.8	-2.1489	-2.0504	0.0041755	-15.7722	-15.4689	0.0071481	-2.0197	0.066738	0.51192	0.0088046	NaN	NaN	-18.3908	0.26874	0.25465	0.03545	23.6846	17.3161	34.6018	2.2602	60
	150828_2_C64	krh	9.418	90.398	600	-3.1614	170.483	-21.2493	1200	69.366	7.3653		PollyPrepLine_1HourPrep.vi	"9/1/2015,10:45:50"	56153	150324_Cracker_PBL	140.89	31.66	3.9	-2.1479	-2.0494	0.0039092	-15.7635	-15.4407	0.005746	-1.9592	0.060904	0.56574	0.0079586	NaN	NaN	-18.2986	0.23807	0.33091	0.03126	26.7635	20.1318	37.6942	2.6265	60
	150609_1_C64	krh	6.902	90.5056	600	-3.6596	32.126	-20.6937	1200	51.686	7.4886		PollyPrepLine_1HourPrep.vi	"09/02/15,16:23:12"	56234	150324_Cracker_PBL	104.72	23.8	-58.7	-2.137	-2.0383	0.0040776	-15.9487	-15.6122	0.0072711	-2.1554	0.067811	0.54881	0.0084831	NaN	NaN	-18.6594	0.2368	0.33947	0.030994	61.6968	20.1736	73.3935	2.6328	60
	150826_1_C64	krh	8.803	89.869	600	-11.4907	24.7813	-20.4022	1200	64.357	7.3108		PollyPrepLine_1HourPrep.vi	"09/02/15,18:49:11"	56241	150324_Cracker_PBL	129.95	29.44	17.8	-2.089	-1.9896	0.0051157	-15.8431	-15.5082	0.0073958	-2.0153	0.065911	0.5325	0.0085486	NaN	NaN	-18.3516	0.27799	0.43845	0.036556	48.0548	16.2704	59.322	2.1233	60
	150827_1_C64	krh	8.262	90.0568	600	-6.7721	24.0956	-21.4369	1200	61.721	7.4705		PollyPrepLine_1HourPrep.vi	"09/02/15,21:06:36"	56248	150324_Cracker_PBL	124.83	28.16	-0.6	-2.0978	-1.9985	0.0043539	-15.7023	-15.3697	0.0066381	-1.8781	0.050334	0.53324	0.0065705	NaN	NaN	-18.0963	0.22267	0.41256	0.029138	84.1223	19.5361	95.476	2.5486	60
	150828_1_C64	krh	8.178	90.1454	600	-5.6448	52.8078	-21.5067	1200	60.436	7.3901		PollyPrepLine_1HourPrep.vi	"09/02/15,23:34:23"	56255	150324_Cracker_PBL	121.92	27.56	5.5	-2.1253	-2.0264	0.0039496	-15.8822	-15.545	0.0062536	-2.0674	0.061367	0.5574	0.0080692	NaN	NaN	-18.3516	0.23374	0.51797	0.030618	151.525	18.2046	164.046	2.3756	60
	150831_1_C64	andy	7.917	90.7733	600	-3.8098	60.3645	-20.8493	1200	60.547	7.6477	First sample with V10b, power outage two days ago, full overnight backout last night at 200 C	PollyPrepLine_1HourPrep.vi	"09/03/15,01:52:48"	56262	150324_Cracker_PBL	119.81	27.22	-0.6	-2.1264	-2.0275	0.0042434	-15.8984	-15.5602	0.0056271	-2.0905	0.060573	0.55173	0.0077992	NaN	NaN	-18.443	0.23672	0.45767	0.031422	90.2811	17.416	102.17	2.2726	60
	150831_2_C64	andy	8.157	90.2115	600	-3.2754	11.8016	-20.8857	1200	62.01	7.6021		PollyPrepLine_1HourPrep.vi	"09/03/15,04:16:42"	56269	150324_Cracker_PBL	127.74	28.24	-1.7	-2.1202	-2.0213	0.0046315	-15.8305	-15.493	0.0074348	-1.9952	0.071304	0.5724	0.0089387	NaN	NaN	-18.0583	0.75641	0.71191	0.098753	178.244	29.8042	190.926	3.8882	60
	150901_1_C64	andy	8.022	90.5529	600	-13.4793	51.2811	-20.65	1200	60.408	7.5303		PollyPrepLine_1HourPrep.vi	"9/4/2015,7:32:40"	56347	150324_Cracker_PBL	121.22	27.56	-65	-2.1169	-2.0179	0.0038482	-15.893	-15.5479	0.0065921	-2.079	0.067436	0.54814	0.0086678	NaN	NaN	-18.5047	0.27359	0.3838	0.035874	124.717	14.9606	136.96	1.9525	60
	150901_2_C64	andy	7.901	90.5619	600	-8.9953	8.1971	-21.5687	1200	59.599	7.5432		PollyPrepLine_1HourPrep.vi	"9/4/2015,9:58:50"	56354	150324_Cracker_PBL	119.98	27.3	5.5	-2.1377	-2.039	0.004257	-15.9043	-15.5583	0.0062013	-2.1091	0.066504	0.55013	0.0086005	NaN	NaN	-18.5744	0.31382	0.33589	0.041194	38.2507	15.674	49.5938	2.0456	60
	150902_1_C64	andy	8.937	90.0165	600	-28.0217	73.3627	-21.3222	1200	66.767	7.4709		PollyPrepLine_1HourPrep.vi	"9/4/2015,22:08:19"	56389	150324_Cracker_PBL	138.51	30.64	22.4	-2.1543	-2.0558	0.0034464	-15.9902	-15.639	0.0065328	-2.2481	0.057245	0.51332	0.0074908	NaN	NaN	-18.7099	0.24485	0.37216	0.032422	64.7079	15.3192	76.5474	2.0002	60
	150902_2_C64	krh	8.485	90.0627	600	-23.1524	27.2757	-21.5834	1200	57.606	6.7892		PollyPrepLine_1HourPrep.vi	"9/5/2015,0:23:04"	56396	150324_Cracker_PBL	115.13	26.36	5.6	-2.2025	-2.1047	0.0045143	-15.8972	-15.5471	0.0055994	-2.1659	0.060656	0.54879	0.0075655	NaN	NaN	-18.6164	0.26971	0.27881	0.035498	23.8263	18.2836	35.0634	2.3861	60
	150903_1_C64	andy	7.904	90.1733	600	-24.9653	21.5806	-21.5628	1200	59.85	7.5721		PollyPrepLine_1HourPrep.vi	"09/06/15,23:41:53"	56533	150324_Cracker_PBL	121.13	27.47	24	-2.1952	-2.0973	0.0036142	-16.0433	-15.6537	0.0070347	-2.3291	0.064555	0.5276	0.0083898	NaN	NaN	-18.7289	0.21726	0.46101	0.028988	84.2863	17.8521	96.508	2.3307	60
	150903_2_C64	andy	7.957	89.5714	600	-21.3331	-1.4887	-21.1496	1200	60.534	7.6076		PollyPrepLine_1HourPrep.vi	"09/07/15,02:13:43"	56540	150324_Cracker_PBL	126.16	27.99	10.9	-2.1826	-2.0846	0.0039537	-15.9967	-15.6014	0.0076443	-2.2298	0.069292	0.56928	0.0088991	NaN	NaN	-18.8591	0.30214	0.23344	0.039654	16.1603	18.1991	27.4997	2.3752	60
	150908_1_C64	cps	6.436	90.2492	600	1.0283	157.322	-22.0401	1200	47.284	7.3468	30 mtorr on G1 when sample dropped	PollyPrepLine_1HourPrep.vi	"9/8/2015,16:31:04"	56667	150324_Cracker_PBL	95.46	21.75	5.1	-2.2916	-2.1951	0.0044754	-16.2915	-15.838	0.0074767	-2.6914	0.064841	0.51334	0.0080717	NaN	NaN	-19.3407	0.26208	0.34164	0.034264	69.6077	25.2689	82.3132	3.3005	60
	150908_2_C64	cps	6.423	90.1735	600	2.3375	44.3942	-21.9952	1200	48.508	7.5522	10 mtorr at sample drop	PollyPrepLine_1HourPrep.vi	"9/8/2015,18:55:58"	56674	150324_Cracker_PBL	98.11	22.26	-1.7	-2.218	-2.1205	0.0042717	-16.1699	-15.7187	0.0062265	-2.4378	0.056344	0.57423	0.0075222	NaN	NaN	-19.1084	0.25126	0.33129	0.032864	5.7361	16.2022	17.3525	2.1162	60
	150921_1_c64	amh	8.037	90.0332	600	3.2277	31.7195	-20.2994	1200	54.54	6.7861		PollyPrepLine_1HourPrep.vi	"9/22/2015,9:39:28"	57601	150324_Cracker_PBL	110.99	25	17.3	-2.1311	-2.0323	0.004518	-16.3307	-15.8548	0.0066383	-2.5692	0.05718	0.52075	0.0074992	NaN	NaN	-19.4346	0.23366	0.32473	0.031165	33.775	17.3115	45.9673	2.2621	60
	150921_2_c64	amh	10.123	90.0698	600	7.0293	15.7712	-21.9054	1200	71.582	7.0712		PollyPrepLine_1HourPrep.vi	"9/22/2015,12:04:18"	57608	150324_Cracker_PBL	146.62	32.86	-32.7	-2.1085	-2.0094	0.004659	-16.2434	-15.7679	0.0063948	-2.3656	0.062562	0.61869	0.0081008	NaN	NaN	-19.0993	1.0237	0.48935	0.13444	3.018	31.3991	14.6424	4.1003	60
	150923_15_C64	amh	6.12	89.9297	600	4.2312	10.3712	-21.8835	1200	45.321	7.4054		PollyPrepLine_1HourPrep.vi	"9/25/2015,22:13:43"	57837	150324_Cracker_PBL	91.93	20.98	7.5	-2.0913	-1.992	0.0035033	-16.1884	-15.6566	0.0065992	-2.3075	0.064079	0.60242	0.0081784	NaN	NaN	-19.1053	0.25652	0.37133	0.034029	-6.2187	20.0783	5.1683	2.6216	60
	150924_1_C64	amh	6.624	90.1661	600	-0.41122	169.636	-20.6752	1200	47.762	7.2104		PollyPrepLine_1HourPrep.vi	"9/26/2015,0:44:03"	57844	150324_Cracker_PBL	96.87	22	-21.1	-2.3174	-2.2213	0.0050935	-16.577	-16.0397	0.0073542	-2.9638	0.070415	0.56326	0.0086984	NaN	NaN	-19.5923	0.22521	0.66525	0.029634	104.151	23.1752	117.947	3.0293	60
	150924_2_C64	amh	6.634	89.4074	600	4.7068	42.7427	-21.8171	1200	48.942	7.3774		PollyPrepLine_1HourPrep.vi	"9/26/2015,3:12:24"	57851	150324_Cracker_PBL	102.34	22.69	-14.9	-2.1406	-2.042	0.0042996	-16.278	-15.7429	0.0058862	-2.4895	0.066315	0.55774	0.0084656	NaN	NaN	-19.3236	0.24872	0.33103	0.032546	-9.0535	24.1349	2.5329	3.1521	60
	150926_9_C64	amh	8.017	90.1918	600	6.1009	11.6021	-21.948	1200	58.875	7.3438		PollyPrepLine_1HourPrep.vi	"9/30/2015,1:40:43"	58125	150324_Cracker_PBL	118.13	28.07	-18.4	-2.1289	-2.0301	0.0035917	-16.1534	-15.571	0.0057513	-2.3555	0.07238	0.5517	0.0094091	NaN	NaN	-19.1226	0.25922	0.28292	0.034196	-2.4513	17.2185	8.9457	2.2486	60
	151001_1_c64	cps	6.743	89.5498	600	-4.9978	155.707	-21.4511	1200	48.511	7.1943	new acid	PollyPrepLine_1HourPrep.vi	"10/01/15,18:54:36"	58240	150324_Cracker_PBL	100.05	23.29	4.4	-2.2831	-2.1865	0.0042981	-16.3913	-15.8049	0.0074314	-2.737	0.071426	0.56571	0.0092717	NaN	NaN	-19.5259	0.36704	0.35549	0.04845	38.6437	26.5237	51.1838	3.4658	60
	151001_2_c64	cps	7.117	90.1104	600	-3.1384	70.6443	-22.1233	1200	51.303	7.2085		PollyPrepLine_1HourPrep.vi	"10/01/15,21:41:55"	58247	150324_Cracker_PBL	105.25	24.57	70.7	-2.1865	-2.0885	0.0039705	-16.1985	-15.6162	0.0056724	-2.4084	0.073005	0.60454	0.0096129	NaN	NaN	-19.1813	0.30201	0.31487	0.039361	-0.6731	23.375	10.8956	3.053	60
	151012_1_c64	krh	7.475	90.2397	600	-1.8299	48.7181	-20.7769	1200	51.036	6.8276		PollyPrepLine_1HourPrep.vi	"10/12/2015,19:57:31"	59000	150324_Cracker_PBL	103.31	23.54	13.3	-2.2843	-2.1877	0.0037933	-16.055	-15.4805	0.0068934	-2.4423	0.065879	0.51194	0.0087337	NaN	NaN	-18.8277	0.27944	0.38437	0.036533	59.0458	26.76	71.103	3.4941	60
	151019_2_C64	Erica/Landon	8.218	90.0307	600	-5.7875	5.05	-21.72	1200	61.535	7.4878		PollyPrepLine_1HourPrep.vi	"10/20/15,16:00:13"	59548	150324_Cracker_PBL	124.83	28.24	-0.8	-2.1093	-2.0102	0.0045924	-16.2324	-15.6569	0.0053724	-2.4325	0.05655	0.53613	0.0075631	NaN	NaN	-19.1328	0.2362	0.43286	0.031319	73.6761	16.6585	86.1008	2.176	60	standard
	151019_3_C64	Erica/Landon	8.46	89.8876	600	-7.3731	3.7781	-21.8203	1200	62.332	7.3678		PollyPrepLine_1HourPrep.vi	"10/20/15,18:28:19"	59555	150324_Cracker_PBL	127.04	28.76	-18.4	-2.1093	-2.0102	0.0039011	-16.226	-15.6507	0.0065222	-2.45	0.06634	0.5105	0.0085663	NaN	NaN	-19.3098	0.2761	0.23935	0.036353	54.9243	23.382	67.1169	3.0531	60	standard
	151023_1_C64	erica/landon	9.199	90.2701	600	-10.4366	23.1508	-21.2723	1200	67.427	7.3298		PollyPrepLine_1HourPrep.vi	"10/26/2015,12:35:51"	59953	150324_Cracker_PBL	137.53	30.98	-24.4	-1.9738	-1.8728	0.0038504	-16.3216	-15.7702	0.0076508	-2.4298	0.070824	0.49679	0.0091862	NaN	NaN	-19.4669	0.23936	0.27267	0.032067	40.7335	15.7414	52.822	2.056	60
	151028_2_C64	andy	7.935	89.8246	600	-0.16189	7.1648	-21.8572	1200	59.374	7.4825		PollyPrepLine_1HourPrep.vi	"10/28/15,15:03:57"	60101	150324_Cracker_PBL	119.72	27.3	-0.5	-2.0403	-1.9402	0.0045123	-16.2847	-15.7444	0.0080117	-2.4315	0.052256	0.52323	0.0068401	NaN	NaN	-19.3726	0.42941	0.29411	0.056303	32.7014	25.1419	44.6877	3.2835	60
	151030_1_C64	cps	8.167	90.0268	600	-7.5156	15.0275	-21.5625	1200	57.277	7.0132	drop t0 during intrasample bake out	PollyPrepLine_1HourPrep.vi	"10/30/15,18:12:37"	60244	150324_Cracker_PBL	115.57	27.13	-24.8	-2.058	-1.9582	0.0038195	-16.4279	-15.8939	0.0069702	-2.6202	0.064436	0.49764	0.0084071	NaN	NaN	-19.6636	0.28375	0.28836	0.037546	48.9918	17.6283	61.4961	2.3036	60
	151102_1_C64	cps	6.979	90.2014	600	-9.6333	21.5065	-21.2373	1200	52.031	7.4554		PollyPrepLine_1HourPrep.vi	"11/2/2015,17:37:13"	60448	150324_Cracker_PBL	104.99	24.14	5.6	-2.0752	-1.9756	0.0033621	-16.3625	-15.8399	0.0072309	-2.55	0.063258	0.51834	0.0079939	NaN	NaN	-19.4187	0.24876	0.40526	0.033286	70.1135	19.9978	82.7455	2.6118	60
	151112_1_C64	randy	8.504	90.1303	600	-12.6217	29.888	-21.4485	1200	65.593	7.7132	pumped residual	PollyPrepLine_1HourPrep.vi	"11/13/15,08:07:17"	61130	150324_Cracker_PBL	129.51	29.18	3.8	-2.1984	-2.1006	0.0042816	-15.9485	-15.5512	0.0068602	-2.2394	0.072504	0.52245	0.0092138	NaN	NaN	-18.6578	0.28611	0.34098	0.037502	87.617	26.8653	99.6683	3.5066	60
	151112_12_C64	randy	8.942	90.2938	600	-5.4904	3.7771	-21.9262	1200	64.682	7.2335		PollyPrepLine_1HourPrep.vi	"11/14/15,10:04:31"	61208	150324_Cracker_PBL	136.65	29.87	-9.4	-2.2105	-2.1128	0.0041591	-15.7869	-15.4165	0.005564	-2.019	0.059917	0.59257	0.0078602	NaN	NaN	-18.4823	0.29287	0.1917	0.038387	-18.2554	21.4168	-7.6971	2.7946	60
	151116_1_C64	randy	9.842	89.9806	600	-12.7779	11.435	-21.8749	1200	70.844	7.1981	pumped residual	PollyPrepLine_1HourPrep.vi	"11/18/15,20:47:01"	61502	150324_Cracker_PBL	147.77	32.77	-3	-2.1376	-2.0389	0.0032722	-15.9297	-15.6027	0.0056327	-2.1654	0.059377	0.51781	0.0077815	NaN	NaN	-18.6313	0.24672	0.32947	0.032344	71.6951	19.1318	83.4615	2.4973	60
	151116_13_C64	randy	9.05	89.3398	600	-6.038	2.4227	-22.1366	1200	65.824	7.2734		PollyPrepLine_1HourPrep.vi	"11/20/15,00:22:59"	61587	150324_Cracker_PBL	134.36	30.04	10.1	-2.1556	-2.0572	0.0039002	-15.8751	-15.5551	0.006171	-2.1232	0.063858	0.52144	0.0082567	NaN	NaN	-18.583	0.31402	0.2678	0.040996	-5.8412	16.4865	4.9758	2.1516	60
	151119_6_C64	randy	8.757	89.9533	600	-8.7735	4.7633	-22.0945	1200	64.387	7.3526	pumped residual	PollyPrepLine_1HourPrep.vi	"11/22/2015,7:53:02"	61757	150324_Cracker_PBL	130.3	29.35	31.2	-2.1505	-2.052	0.0064711	-15.9312	-15.6604	0.0093207	-2.1134	0.06883	0.58821	0.0087118	NaN	NaN	-18.8342	1.3119	0.12575	0.17192	-2.0022	32.8321	8.9664	4.2846	60
cor
	150323_1_COR	egh	8.009	90.6247	600	-6.0651	15.1324	-21.8328	1200	58.83	7.3455	20 minute acid pump time	PollyPrepLine_1HourPrep.vi	"3/24/2015,10:05:31"	46170	150324_Cracker_PBL	119.28	28.5	-22.4	-2.1835	-2.0855	0.0047257	-4.8108	-4.5	0.0068092	9.3364	0.069019	0.62202	0.0087973	NaN	NaN	3.3059	0.33004	-0.0097691	0.042138	81.1579	22.5532	68.8185	2.8778	60
	150323_10_COR	egh	4.461	90.2294	600	-3.7359	3.9875	-21.6424	1200	32.034	7.1809	20 minute acid pump time	PollyPrepLine_1HourPrep.vi	"3/25/2015,8:12:10"	46233	150324_Cracker_PBL	64.41	15.68	-165.4	-2.2763	-2.1796	0.0043364	-4.7429	-4.5323	0.0070728	9.3635	0.083556	0.67294	0.010399	NaN	NaN	3.1681	0.44841	-0.2831	0.057116	0.40731	40.8073	-11.0558	5.2071	60
	150401_1_cor	andy	5.948	89.5959	600	14.2425	6.1986	-21.5426	1200	43.772	7.3591	new molecular sieve in foreline trap yesterday	PollyPrepLine_1HourPrep.vi	"4/1/2015,21:12:06"	46744	150324_Cracker_PBL	88.14	20.89	5.6	-2.3188	-2.2227	0.0043423	-4.5766	-4.437	0.0070721	9.4544	0.058089	0.63218	0.007653	NaN	NaN	3.749	0.2915	-0.037797	0.0377	102.109	24.0048	89.1674	3.0624	60
	150401_10_cor	lkb	8.252	90.1457	600	1.5784	3.7914	-21.5914	1200	60	7.271		PollyPrepLine_1HourPrep.vi	"4/2/2015,18:37:01"	46807	150324_Cracker_PBL	121.83	28.84	-23.2	-2.3817	-2.2865	0.0047816	-4.5202	-4.4344	0.0073404	9.4317	0.063804	0.61211	0.0079899	NaN	NaN	3.7151	0.27355	-0.18442	0.035294	5.2599	19.2061	-6.597	2.4504	60
	150413_1_COR	egh	8.14	89.99	600	-11.7463	21.1664	-21.6524	1200	59.645	7.3274		PollyPrepLine_1HourPrep.vi	"4/13/2015,19:58:30"	47612	150324_Cracker_PBL	122.19	28.33	-7.9	-2.2917	-2.1952	0.0041648	-4.5534	-4.4738	0.0062517	9.5022	0.057379	0.62941	0.0075712	NaN	NaN	3.8291	0.29428	-0.0045391	0.037598	82.4896	17.99	69.699	2.2951	60
	150413_7_COR	egh	4.622	89.9293	600	-9.1261	-1.8971	-21.2859	1200	33.775	7.3074		PollyPrepLine_1HourPrep.vi	"4/14/2015,10:09:44"	47654	150324_Cracker_PBL	70.85	16.28	-23	-2.3262	-2.2302	0.0032586	-4.5427	-4.4794	0.0066044	9.5269	0.062808	0.6795	0.0079937	NaN	NaN	3.8614	0.33646	0.0062357	0.043129	28.5977	23.2232	16.4555	2.9628	60
	150422_1_cor	andy	4.234	90.1094	600	-12.6045	10.1908	-21.8006	1200	30.812	7.2773		PollyPrepLine_1HourPrep.vi	"04/22/15,20:09:16"	48208	150324_Cracker_PBL	63.18	14.74	6.7	-2.2246	-2.1271	0.0048235	-4.7072	-4.6497	0.006595	9.4173	0.074364	0.63749	0.0092018	NaN	NaN	3.7482	0.43728	0.22321	0.056012	93.454	32.5276	80.7947	4.1503	60
	150430_2_Coral	andy	6.631	90.1667	600	-9.3196	2.6463	-21.705	1200	48.083	7.2512		PollyPrepLine_1HourPrep.vi	"5/1/2015,17:00:00"	48801	150324_Cracker_PBL	97.4	22.18	-16.7	-2.3385	-2.2427	0.0045097	-4.4949	-4.4656	0.0074808	9.5699	0.06813	0.6856	0.0084547	NaN	NaN	3.891	0.28188	-0.060244	0.036447	38.6303	28.6771	26.2843	3.6583	60
	150501_4_coral	andy	9.032	90.1474	600	-8.9622	0.60593	-21.546	1200	65.578	7.2606		PollyPrepLine_1HourPrep.vi	"5/2/2015,9:47:18"	48850	150324_Cracker_PBL	131.36	29.95	32.3	-2.4329	-2.3384	0.0040615	-4.4766	-4.457	0.0084315	9.4811	0.059233	0.66983	0.0075737	NaN	NaN	3.8294	0.25751	-0.1579	0.033265	34.6992	27.1705	22.4592	3.466	60
	150512_10_cor	karl	6.589	90.6644	600	-7.4824	3.3804	-21.7653	1200	48.83	7.4108	ran two more samples after final standard to get ahead for tomorrow - required changing out samples from chamber, didn't click "firstsample" on these runs, just stuck with "run sample"	PollyPrepLine_1HourPrep.vi	"5/13/2015,22:51:08"	49616	150324_Cracker_PBL	97.4	22.35	-0.5	-2.4667	-2.3727	0.0044844	-4.4281	-4.456	0.0091929	9.4899	0.053546	0.66147	0.0066043	NaN	NaN	3.8507	0.28749	-0.23384	0.037133	30.1966	34.8824	17.9456	4.4504	60
	150515_5_cor	andy	4.04	90.5539	600	-10.9427	-3.3961	-21.7263	1200	29.809	7.3785		PollyPrepLine_1HourPrep.vi	"5/16/2015,1:45:21"	49758	150324_Cracker_PBL	59.65	13.97	-3.7	-2.5137	-2.4204	0.0050945	-4.4955	-4.5353	0.0061	9.3505	0.061731	0.6363	0.0081872	NaN	NaN	4.0097	0.30149	0.059889	0.039028	102.355	29.7654	89.4466	3.798	60
	150518_1_coral	cps	6.699	90.3038	600	-10.8582	8.9296	-21.0689	1200	49.796	7.4333		PollyPrepLine_1HourPrep.vi	"5/18/2015,19:42:09"	49918	150324_Cracker_PBL	102.34	23.2	11.3	-2.424	-2.3294	0.0039389	-4.4706	-4.5152	0.0059916	9.461	0.058732	0.63293	0.0075043	NaN	NaN	4.0376	0.20469	0.037446	0.026325	155.183	28.8599	141.498	3.6819	60
	150520_1_cor	andy	8.023	90.4454	600	-12.1021	10.8403	-21.7898	1200	58.563	7.2994		PollyPrepLine_1HourPrep.vi	"5/20/2015,13:07:46"	50036	150324_Cracker_PBL	118.22	27.05	25.7	-2.504	-2.4105	0.0043316	-4.4253	-4.4605	0.0072912	9.4348	0.065762	0.63895	0.0085507	NaN	NaN	3.9727	0.22829	-0.11779	0.028981	82.4053	35.3766	69.5692	4.5131	60
	150520_5_cor	andy	6.034	90.5011	600	-9.2361	0.68545	-21.8597	1200	44.4	7.3583		PollyPrepLine_1HourPrep.vi	"5/20/2015,22:48:06"	50064	150324_Cracker_PBL	89.37	20.55	5.2	-2.4796	-2.3858	0.0050504	-4.4555	-4.4642	0.008062	9.3935	0.062625	0.60307	0.0084089	NaN	NaN	3.8162	0.24526	-0.21317	0.031756	35.9309	39.3371	23.6815	5.0189	60
	150603_1_coral	cps	7.331	90.2136	600	-11.298	32.488	-21.9247	1200	53.2	7.2569		PollyPrepLine_1HourPrep.vi	"6/3/2015,18:38:28"	50804	150324_Cracker_PBL	108.07	25.25	-0.3	-2.3964	-2.3014	0.0049503	-4.4821	-4.4725	0.0072244	9.4804	0.056492	0.63736	0.0074897	NaN	NaN	3.8683	0.28175	-0.10816	0.03612	139.919	41.1969	126.409	5.2562	60
	150610_2_cor	krh	7.178	90.5852	600	-3.8476	8.423	-21.1383	1200	52.797	7.3554		PollyPrepLine_1HourPrep.vi	"6/10/2015,20:52:44"	51267	150324_Cracker_PBL	106.49	24.91	10	-2.251	-2.1539	0.0035604	-4.6272	-4.5928	0.0061269	9.4935	0.046047	0.65807	0.0060208	NaN	NaN	3.4603	0.2915	-0.22429	0.0376	12.0847	23.8467	0.2306	3.0426	60
	150610_10_cor	krh	6.565	90.6342	600	-5.5611	0.38226	-21.082	1200	47.864	7.2908		PollyPrepLine_1HourPrep.vi	"6/11/2015,16:22:35"	51323	150324_Cracker_PBL	96.17	22.77	-36.5	-2.2958	-2.1994	0.0038669	-4.5604	-4.483	0.0069063	9.5488	0.052364	0.69029	0.0066302	NaN	NaN	3.7381	0.28116	-0.081385	0.03585	30.3017	18.3843	18.1443	2.3452	60
	150625_2_cor	plu	7.89	90.5235	600	-2.536	11.7136	-21.5589	1200	57.4	7.275		PollyPrepLine_1HourPrep.vi	"6/25/2015,18:53:02"	52279	150324_Cracker_PBL	118.13	26.88	10.8	-2.2789	-2.1822	0.0038416	-4.5392	-4.4231	0.007334	9.5241	0.067923	0.62364	0.0084579	NaN	NaN	4.1972	0.30829	0.33336	0.039481	48.3675	23.3425	35.9358	2.9777	60
	150629_2_cor	egh	6.275	90.2633	600	-6.9973	4.0294	-21.6048	1200	46.736	7.448		PollyPrepLine_1HourPrep.vi	"6/29/2015,19:38:12"	52558	150324_Cracker_PBL	94.14	21.49	-18.8	-2.2834	-2.1868	0.0044658	-4.6794	-4.5519	0.0080666	9.4401	0.065525	0.69202	0.0086043	NaN	NaN	3.3933	0.23329	-0.18607	0.030005	15.3949	25.2681	3.64	3.2245	60
	150629_3_cor	egh	7.2	90.3449	600	-6.6061	2.8998	-21.7362	1200	53.807	7.4732		PollyPrepLine_1HourPrep.vi	"6/29/2015,22:08:32"	52565	150324_Cracker_PBL	108.52	24.57	12.8	-2.2933	-2.1968	0.0035202	-4.6773	-4.5965	0.0062883	9.4369	0.072615	0.69664	0.0092388	NaN	NaN	3.5602	0.22996	-0.023803	0.029504	32.6432	19.4052	20.6954	2.4764	60
	150629_4_cor	egh	8.213	90.3166	600	-6.8371	4.0633	-21.714	1200	60.785	7.4011		PollyPrepLine_1HourPrep.vi	"6/30/2015,0:33:49"	52572	150324_Cracker_PBL	123.6	27.73	-99	-2.3123	-2.2161	0.0040506	-4.6796	-4.6307	0.0083401	9.3966	0.070539	0.67626	0.008938	NaN	NaN	3.4031	0.29657	-0.17575	0.037689	23.646	28.1822	11.8257	3.5962	60
	150714_6_coral	andy	7.617	90.3324	600	-5.5983	3.1357	-21.1535	1200	56.434	7.409		PollyPrepLine_1HourPrep.vi	"7/14/2015,13:52:39"	52916	150324_Cracker_PBL	114.95	28.07	-22.7	-2.322	-2.2259	0.0048253	-4.3239	-4.3511	0.0063351	9.7095	0.058229	0.63002	0.0075182	NaN	NaN	4.3124	0.32744	0.016126	0.041987	-606.314	2663.01	-611.153	339.595	60
	150713_6_coral	andy	7.299	90.5438	600	-5.0368	2.8091	-21.334	1200	54.064	7.407		PollyPrepLine_1HourPrep.vi	"7/15/2015,2:51:06"	52951	150324_Cracker_PBL	108.52	26.28	-1.7	-2.3654	-2.27	0.0061499	-4.3764	-4.4506	0.010439	9.606	0.07763	0.62301	0.0091023	NaN	NaN	4.0614	0.2546	-0.12807	0.032007	-93.9415	153.822	-104.902	19.6208	60
	150715_6_coral	andy	6.553	90.2389	600	-3.9319	3.104	-20.7222	1200	48.475	7.3974		PollyPrepLine_1HourPrep.vi	"7/16/2015,4:15:15"	53022	150324_Cracker_PBL	97.67	23.54	-28.9	-2.3071	-2.2108	0.01737	-4.3194	-4.4162	0.18111	9.8119	0.55918	0.71751	0.045639	NaN	NaN	4.2213	0.60343	-0.083562	0.043335	-8.4284	14.9234	-20.5916	1.9111	60
	150721_2_cor	plu	6.29	90.0564	600	-6.2871	9.1469	-21.092	1200	45.5	7.2337		PollyPrepLine_1HourPrep.vi	"7/21/2015,17:43:42"	53383	150324_Cracker_PBL	90.87	21.41	21.8	-2.2712	-2.1744	0.0053494	-4.5701	-4.5188	0.008622	9.5189	0.058453	0.64383	0.0074912	NaN	NaN	3.6169	0.30598	-0.18257	0.039205	26.5614	31.0853	14.4429	3.966	60
	150731_6_cor	andy	7.899	90.1102	600	1.7922	8.7105	-20.7809	1200	58.869	7.4527		PollyPrepLine_1HourPrep.vi	"7/31/2015,17:45:42"	54053	150324_Cracker_PBL	118.57	26.79	27.1	-2.3359	-2.24	0.004435	-4.7087	-4.6017	0.0069713	9.3064	0.067919	0.63738	0.0087437	NaN	NaN	3.3073	0.25679	-0.21265	0.032912	18.2706	25.3533	6.5951	3.2354	60
	150803_6_coral	andy	6.547	90.0636	600	5.564	11.3533	-20.9721	1200	48.414	7.3948		PollyPrepLine_1HourPrep.vi	"8/3/2015,13:19:18"	54252	150324_Cracker_PBL	97.75	22.26	-2.8	-2.2951	-2.1987	0.0047073	-4.7225	-4.5755	0.0067635	9.3497	0.061433	0.6556	0.0078032	NaN	NaN	3.5166	0.32745	0.023399	0.041747	39.0018	30.6624	27.0754	3.9127	60
	150806_2_coral	cps	5.83	90.1137	600	7.6498	74.7725	-21.6844	1200	42.186	7.236		PollyPrepLine_1HourPrep.vi	"8/6/2015,22:04:50"	54488	150324_Cracker_PBL	84.26	19.35	14.9	-2.3431	-2.2473	0.0040301	-4.5929	-4.4454	0.0062831	9.3927	0.054012	0.60996	0.006999	NaN	NaN	3.7579	0.25364	0.0038386	0.032863	59.8178	21.5655	47.4313	2.7514	60
	150817_6_coral	andy	8.004	89.896	600	-8.2928	0.92682	-20.0655	1200	58.884	7.3568	lab starting to overheat	PollyPrepLine_1HourPrep.vi	"8/17/2015,15:39:41"	55241	150324_Cracker_PBL	118.75	26.96	21.3	-2.2624	-2.1655	0.0041821	-4.5791	-4.5022	0.006208	9.5515	0.06721	0.67902	0.0085744	NaN	NaN	3.622	0.25705	-0.15944	0.033256	20.1206	19.4339	8.0873	2.4795	60
	150819_6_coral	andy	7.916	90.2154	600	-1.0045	8.4851	-21.2957	1200	57.983	7.3248		PollyPrepLine_1HourPrep.vi	"8/20/2015,2:00:04"	55405	150324_Cracker_PBL	117.34	27.65	3	-2.2166	-2.119	0.0042119	-4.6021	-4.5153	0.0056781	9.588	0.06031	0.69486	0.0077244	NaN	NaN	3.6867	0.24136	-0.049134	0.031367	29.2285	18.9645	17.0878	2.4192	60
	150821_8_coral	andy	8.202	90.0726	600	-0.7339	6.3641	-21.2041	1200	59.692	7.2777		PollyPrepLine_1HourPrep.vi	"8/24/2015,5:59:02"	55686	150324_Cracker_PBL	123.95	27.9	-108.5	-2.5126	-2.4193	0.0055944	-4.4731	-4.4133	0.039047	9.3886	0.075495	0.65128	0.0084807	NaN	NaN	7.0124	0.89272	3.0057	0.10518	131.697	37.2256	118.393	4.7409	60
	150825_7_coral	andy	8.258	90.1652	600	-6.3082	3.8665	-21.2961	1200	59.687	7.2278		PollyPrepLine_1HourPrep.vi	"08/26/15,22:59:55"	55855	150324_Cracker_PBL	124.92	27.99	24.9	-2.3521	-2.2565	0.0040735	-4.6413	-4.6109	0.0074946	9.3781	0.065596	0.65648	0.0083618	NaN	NaN	3.5462	0.22383	-0.1098	0.028625	36.6716	16.0496	24.6638	2.0475	60
	150827_7_coral	krh	8.3	89.9025	600	-2.3657	12.7191	-21.5848	1200	61.287	7.384		PollyPrepLine_1HourPrep.vi	"8/28/2015,22:55:29"	55991	150324_Cracker_PBL	125.1	28.5	11.3	-2.2609	-2.164	0.004609	-4.5127	-4.4611	0.0071674	9.6148	0.065805	0.67196	0.0082076	NaN	NaN	3.8403	0.25532	-0.075429	0.032929	66.6336	18.3912	53.9109	2.3461	60
	150901_7_coral	andy	8.147	90.4738	600	-19.7917	-0.27174	-21.5893	1200	61.017	7.4895		PollyPrepLine_1HourPrep.vi	"9/4/2015,19:47:24"	56382	150324_Cracker_PBL	122.19	27.73	31.4	-2.312	-2.2158	0.0039214	-4.4095	-4.2908	0.0067664	9.6593	0.069495	0.65977	0.0090279	NaN	NaN	4.1364	0.25202	0.012812	0.032461	71.3144	16.5733	58.3714	2.1138	60
	150903_7_coral	andy	7.948	89.9436	600	-19.9315	-1.6859	-21.7017	1200	58.558	7.3676		PollyPrepLine_1HourPrep.vi	"09/07/15,09:53:12"	56576	150324_Cracker_PBL	117.51	26.71	-5.6	-2.3897	-2.2946	0.0038267	-4.7261	-4.5604	0.0083625	9.2234	0.061359	0.62434	0.0079042	NaN	NaN	3.449	0.25294	-0.036265	0.032292	77.0209	19.7189	64.7685	2.5163	60
	150910_1_coral	cps	6.832	90.1742	600	0.82307	14.2548	-22.0374	1200	49.624	7.2635		PollyPrepLine_1HourPrep.vi	"9/10/2015,17:43:29"	56807	150324_Cracker_PBL	101.19	22.86	-10.6	-2.3836	-2.2884	0.0041839	-4.8255	-4.577	0.0075519	9.1096	0.070973	0.60592	0.0088029	NaN	NaN	3.2853	0.29264	5.47e-05	0.037243	103.782	19.0117	91.4375	2.4269	60
	150910_2_coral	cps	7.174	90.2875	600	2.9131	9.2262	-21.8656	1200	52.758	7.3541		PollyPrepLine_1HourPrep.vi	"9/10/2015,20:13:28"	56814	150324_Cracker_PBL	105.78	24.14	-117.8	-2.4124	-2.3176	0.0041394	-4.8478	-4.4929	0.0063601	9.0565	0.066027	0.60405	0.0084886	NaN	NaN	3.0525	0.26452	-0.18708	0.033729	23.1503	19.8266	11.7793	2.5311	60
	150921_8_coral	amh	8.204	90.0542	600	7.3448	12.7859	-21.8515	1200	58.012	7.0712		PollyPrepLine_1HourPrep.vi	"9/23/2015,2:32:01"	57650	150324_Cracker_PBL	115.22	26.36	-89	-2.2299	-2.1325	0.0062446	-4.9264	-4.5295	0.010204	9.2063	0.057586	0.6584	0.0069482	NaN	NaN	3.1147	1.2001	0.03181	0.15229	19.0519	42.719	7.6993	5.4507	60
	150922_1_coral	amh	6.19	89.7966	600	2.6116	18.2603	-21.9207	1200	45.597	7.3662		PollyPrepLine_1HourPrep.vi	"9/23/2015,8:54:40"	57667	150324_Cracker_PBL	92.11	20.72	8.6	-2.263	-2.1661	0.0040975	-4.9491	-4.5469	0.0072883	9.139	0.066939	0.64642	0.0086555	NaN	NaN	3.1769	0.2583	0.13965	0.033286	101.244	20.1062	89.0658	2.5669	60
	150922_2_coral	amh	6.93	89.8715	600	4.6403	11.3767	-21.981	1200	50.921	7.3479		PollyPrepLine_1HourPrep.vi	"9/23/2015,11:21:30"	57674	150324_Cracker_PBL	102.78	23.37	12.9	-2.2648	-2.1679	0.0045041	-4.9346	-4.5206	0.0079164	9.1777	0.07383	0.67327	0.0091132	NaN	NaN	2.9776	0.36471	-0.08814	0.046658	27.4963	22.1062	16.1032	2.8217	60
	150924_15_coral	amh	6.894	90.4481	600	6.3439	12.0404	-21.6508	1200	50.623	7.3431		PollyPrepLine_1HourPrep.vi	"9/27/2015,14:47:47"	57949	150324_Cracker_PBL	102.43	23.2	15.3	-2.2411	-2.1439	0.003631	-4.8517	-4.4525	0.0055355	9.2877	0.070137	0.67461	0.0091644	NaN	NaN	3.1078	0.26597	-0.12494	0.034235	16.4376	15.4602	4.9754	1.9735	60
	150925_1_coral	amh	6.433	89.9964	600	-0.64108	22.22	-21.6497	1200	48.15	7.4848		PollyPrepLine_1HourPrep.vi	"9/27/2015,17:17:21"	57956	150324_Cracker_PBL	97.31	22.18	23.4	-2.3235	-2.2275	0.0040523	-4.9078	-4.5225	0.0062865	9.0725	0.066488	0.59392	0.0085472	NaN	NaN	3.0541	0.23942	-0.065566	0.030527	86.5457	21.0349	74.5055	2.6851	60
	150925_2_coral	amh	7.163	90.4638	600	3.5855	9.6427	-21.5675	1200	52.761	7.3658		PollyPrepLine_1HourPrep.vi	"9/27/2015,19:42:38"	57963	150324_Cracker_PBL	105.96	24.14	-0.5	-2.2244	-2.1269	0.0037947	-4.8558	-4.5141	0.0054699	9.272	0.062467	0.64529	0.007983	NaN	NaN	3.1464	0.22532	-0.078327	0.028616	23.2109	19.3456	11.6638	2.4694	60
	151012_2_coral	krh	7.42	90.0613	600	1.2051	9.3336	-21.8426	1200	55.233	7.4438		PollyPrepLine_1HourPrep.vi	"10/12/2015,22:24:11"	59007	150324_Cracker_PBL	111.51	25.34	17.2	-2.4128	-2.318	0.0044207	-4.8747	-4.5092	0.007132	9.0962	0.063099	0.67542	0.0078589	NaN	NaN	3.0219	0.25649	-0.16355	0.032802	8.6159	24.8545	-2.5399	3.1727	60
	151012_7_coral	krh	7.829	89.8721	600	3.777	13.0815	-22.0654	1200	57.311	7.3203		PollyPrepLine_1HourPrep.vi	"10/13/2015,8:07:02"	59035	150324_Cracker_PBL	115.84	26.19	18.2	-2.4226	-2.328	0.0034226	-4.7171	-4.3374	0.0074739	9.2597	0.067308	0.68683	0.0086987	NaN	NaN	3.3997	0.23719	-0.10343	0.030201	20.0052	17.3672	8.4148	2.2164	60
	151021_1_coral	erica/landon	8	90.2293	600	-5.1548	13.8453	-21.7272	1200	64.687	8.0859		PollyPrepLine_1HourPrep.vi	"10/22/2015,10:13:28"	59668	150324_Cracker_PBL	131.27	29.7	37.4	-2.2004	-2.1026	0.0037254	-4.971	-4.5568	0.0057514	9.147	0.053694	0.61387	0.0068012	NaN	NaN	3.0344	0.30033	0.041245	0.039008	114.705	25.5934	102.357	3.2678	60
	151029_1_coral	andy	8.378	89.9517	600	-7.1351	20.7274	-20.5588	1200	60.538	7.2258		PollyPrepLine_1HourPrep.vi	"10/29/2015,13:42:44"	60164	150324_Cracker_PBL	123.33	29.35	-11.4	-2.1955	-2.0976	0.0041721	-4.994	-4.619	0.0065928	9.1253	0.059428	0.61087	0.0075434	NaN	NaN	2.8965	0.21902	-0.05013	0.028452	59.6795	17.1658	47.9826	2.1914	60
	151103_3_coral	andy	8.792	90.2197	600	-9.3782	-0.13885	-22.0012	1200	63	7.1656		PollyPrepLine_1HourPrep.vi	"11/3/2015,23:09:15"	60531	150324_Cracker_PBL	128.19	29.44	15.9	-2.3029	-2.2066	0.0042604	-5.0102	-4.6517	0.0062131	9.0161	0.068193	0.62442	0.008703	NaN	NaN	2.7943	0.24423	-0.11891	0.031382	58.291	21.2092	46.7566	2.7084	60
	151111_1_coral	randy	9.17	90.2842	600	-12.7515	14.4293	-21.6849	1200	65.436	7.1359	pumped residual. restarted labview due to error on arrival.	PollyPrepLine_1HourPrep.vi	"11/12/2015,5:19:42"	61052	150324_Cracker_PBL	132.68	29.95	2.2	-2.3577	-2.2621	0.0050625	-4.6739	-4.3716	0.0057956	9.2919	0.051264	0.60674	0.0064438	NaN	NaN	3.5811	0.24441	-0.009619	0.031278	104.848	24.2054	92.1306	3.0889	60
	151111_12_coral	randy	8.874	89.9498	600	-6.7202	2.2907	-22.0552	1200	64.225	7.2374	pumped residual	PollyPrepLine_1HourPrep.vi	"11/13/15,05:54:03"	61123	150324_Cracker_PBL	132.68	29.61	-9.5	-2.3325	-2.2366	0.0037181	-4.6324	-4.4052	0.0055581	9.4269	0.064367	0.67795	0.0082004	NaN	NaN	3.5289	0.27307	-0.14495	0.035289	13.771	18.4168	1.99	2.3496	60
	151115_1_coral	randy	9.701	89.6425	600	-9.721	42.2206	-22.4032	1200	64.27	6.6251		PollyPrepLine_1HourPrep.vi	"11/17/15,06:01:00"	61410	150324_Cracker_PBL	133.12	29.78	-14.7	-2.4044	-2.3095	0.0047298	-4.7081	-4.5542	0.0072289	9.2146	0.049414	0.61083	0.0062517	NaN	NaN	3.5277	0.28916	0.0061003	0.037326	134.646	19.4594	121.716	2.4832	60
	151115_13_coral	randy	8.716	89.8235	600	-5.2843	1.6833	-21.9706	1200	63.293	7.2617	pumped residual	PollyPrepLine_1HourPrep.vi	"11/18/15,18:34:15"	61495	150324_Cracker_PBL	131.45	29.35	7.2	-2.3054	-2.2091	0.0050501	-4.6185	-4.5	0.0062852	9.3928	0.064276	0.59886	0.0082769	NaN	NaN	3.5333	0.26555	-0.16852	0.034211	13.7327	16.1271	1.8969	2.0574	60
C2
	150327_1_C2	egh	8.088	90.0138	600	-10.0554	7.1496	-21.3045	1200	61.72	7.6311	20 minute acid pump time	PollyPrepLine_1HourPrep.vi	"3/29/2015,10:28:45"	46510	150324_Cracker_PBL	126.07	29.78	31.2	-48.5017	-49.0633	0.0050518	-16.8675	-16.47	0.0061349	-48.0912	0.06538	0.53602	0.0086922	NaN	NaN	-20.8575	0.25593	0.17548	0.033356	13.2553	17.1612	76.5848	2.3529	60
	150410_1_C2	andy	4.199	90.0786	600	-8.7348	4.9612	-21.5901	1200	31.305	7.4553		PollyPrepLine_1HourPrep.vi	"4/10/2015,19:32:57"	47401	150324_Cracker_PBL	63.53	15.08	-141.3	-48.4865	-49.0479	0.0065072	-16.7565	-16.4486	0.0081356	-47.9745	0.073964	0.52805	0.0096485	NaN	NaN	-20.7807	0.55356	0.028183	0.07238	44.6389	39.3449	109.656	5.3934	60
	150421_5_C2	jrk	5.94	88.8883	600	-4.4539	0.26039	-21.1778	1200	45.944	7.7347		PollyPrepLine_1HourPrep.vi	"4/22/2015,0:22:31"	48151	150324_Cracker_PBL	91.49	21.06	-93.3	-48.429	-48.9896	0.004736	-16.8814	-16.6211	0.0078374	-47.9952	0.065369	0.5794	0.0087244	NaN	NaN	-21.0557	0.30395	0.00082425	0.039611	-54.6443	29.2248	4.4036	4.0067	60
	150511_1_c2	karl	4.526	90.2444	600	-9.3778	30.0677	-20.9666	1200	34.45	7.6116		PollyPrepLine_1HourPrep.vi	"5/12/2015,1:27:32"	49482	150324_Cracker_PBL	68.65	15.85	2.8	-48.5031	-49.0647	0.0061203	-16.652	-16.4027	0.0082789	-47.879	0.057661	0.53802	0.0076438	NaN	NaN	-20.127	0.26575	0.48337	0.034708	60.8094	41.6547	126.612	5.71	60
	150515_1_C2	andy	6.087	90.0532	600	-12.3328	10.2013	-21.6699	1200	45.242	7.4326		PollyPrepLine_1HourPrep.vi	"5/15/2015,16:04:54"	49730	150324_Cracker_PBL	93.34	21.32	24.2	-48.6621	-49.226	0.0050848	-16.6379	-16.3629	0.0063132	-48.0226	0.066484	0.53438	0.0090078	NaN	NaN	-20.1285	0.32118	0.45384	0.042098	94.1075	37.3627	162.131	5.1226	60
	150601_10_C2	jrk	7.284	90.3398	600	-7.134	2.0188	-21.7813	1200	55.63	7.6373		PollyPrepLine_1HourPrep.vi	"06/02/15,18:52:26"	50739	150324_Cracker_PBL	111.6	26.45	-11.6	-48.4916	-49.0531	0.0054329	-16.7215	-16.477	0.0080558	-47.9556	0.055238	0.51652	0.0075938	NaN	NaN	-20.5418	0.25984	0.20104	0.034646	-85.1324	30.5377	-28.2335	4.1871	60
	150618_2_C2	jrk	6.91	90.1066	600	-8.0038	3.8396	-21.4145	1200	52.483	7.5952		PollyPrepLine_1HourPrep.vi	"6/18/2015,23:42:28"	51821	150324_Cracker_PBL	105.96	24.23	-29.4	-48.5468	-49.1091	0.0051401	-16.8461	-16.6239	0.0073816	-48.109	0.060055	0.54163	0.0082397	NaN	NaN	-20.7129	0.35456	0.27984	0.046556	-76.9368	28.4471	-19.2248	3.901	60
	150624_2_C2	plu	6	90.6365	600	-4.2695	9.4126	-20.8976	1200	45.1	7.5167		PollyPrepLine_1HourPrep.vi	"06/24/15,17:52:19"	52210	150324_Cracker_PBL	89.73	20.72	-115.2	-48.4673	-49.0284	0.0052107	-16.7142	-16.507	0.0059109	-47.8925	0.06614	0.55229	0.0090728	NaN	NaN	-20.3582	0.29708	0.37349	0.039085	-35.4026	29.7344	24.5377	4.0762	60
	150714_4_C2	andy	6.124	90.1114	600	-4.2598	1.2649	-21.3883	1200	47.12	7.6943		PollyPrepLine_1HourPrep.vi	"7/14/2015,16:20:45"	52923	150324_Cracker_PBL	94.4	23.12	15.3	-48.5147	-49.0765	0.0050502	-16.5339	-16.3605	0.0067532	-47.7759	0.06221	0.53596	0.0085175	NaN	NaN	-20.2916	0.28529	0.075468	0.037477	-419.321	1772.91	-383.356	242.981	60
	150713_3_C2	andy	6.662	90.3831	600	-5.8924	1.1619	-21.3539	1200	50.926	7.6443		PollyPrepLine_1HourPrep.vi	"7/15/2015,7:56:11"	52965	150324_Cracker_PBL	101.9	24.91	-28.1	-48.4605	-49.0215	0.010255	-16.5689	-16.4393	0.017967	-47.7412	0.084849	0.55449	0.0094382	NaN	NaN	-20.4164	0.37968	0.01879	0.047242	30.0237	167.316	93.6948	22.9385	60
	150715_4_C2	andy	6.579	90.2659	600	-6.3405	1.7426	-21.5227	1200	50.271	7.6411		PollyPrepLine_1HourPrep.vi	"7/16/2015,9:21:54"	53036	150324_Cracker_PBL	105.25	24.74	-22.8	-48.4829	-49.0442	0.0091294	-16.5634	-16.4265	0.016858	-47.7834	0.079869	0.52552	0.0093982	NaN	NaN	-20.3675	0.34195	0.05762	0.042245	8.0429	25.76	70.366	3.5354	60
	150716_4_C2	andy	6.55	90.5094	600	-3.0123	3.686	-21.1329	1200	50	7.6336		PollyPrepLine_1HourPrep.vi	"7/18/2015,1:58:58"	53141	150324_Cracker_PBL	101.64	24.23	-5.9	-48.4578	-49.0188	0.0047172	-16.6202	-16.409	0.0064382	-47.7681	0.058262	0.57784	0.0079552	NaN	NaN	-20.4032	0.25614	0.13661	0.034065	-66.8409	19.7073	-9.0474	2.701	60
	150720_9_C2	arl	8.19	89.8939	600	-4.4872	11.1324	-21.2229	1200	62.9	7.6801		PollyPrepLine_1HourPrep.vi	"7/21/2015,10:39:30"	53366	150324_Cracker_PBL	125.98	29.35	2.1	-48.4057	-48.9659	0.0043906	-16.7521	-16.5161	0.0068762	-47.8533	0.049915	0.57095	0.006544	NaN	NaN	-20.5646	0.2893	0.23961	0.037972	-55.1908	17.3835	3.5355	2.3834	60
	150804_7_C2	cps	6.523	89.958	600	5.6278	10.4467	-21.395	1200	49.828	7.6388	cleaned but not run on 150804	PollyPrepLine_1HourPrep.vi	"8/5/2015,13:39:21"	54396	150324_Cracker_PBL	101.11	23.03	-13.2	-48.4695	-49.0307	0.0046167	-16.9071	-16.6297	0.0065324	-48.0874	0.055256	0.54881	0.0074655	NaN	NaN	-20.9328	0.2463	0.17889	0.03241	-66.0902	20.8041	-7.6603	2.853	60
	150820_6_C2	andy	8.632	90.0944	600	-1.8339	6.2229	-21.0145	1200	63.036	7.3026		PollyPrepLine_1HourPrep.vi	"08/20/15,16:20:33"	55445	150324_Cracker_PBL	127.83	30.12	-24.3	-48.1543	-48.711	0.0048536	-16.6838	-16.3773	0.0071325	-47.5207	0.061313	0.5946	0.0084644	NaN	NaN	-20.4251	0.26519	0.24194	0.034952	-60.6172	19.1666	-2.6309	2.6267	60
	150825_6_C2	andy	8.061	90.0085	600	-4.1132	4.7493	-21.3848	1200	60.783	7.5404		PollyPrepLine_1HourPrep.vi	"08/26/15,20:36:19"	55848	150324_Cracker_PBL	122.72	28.24	-32.1	-48.2586	-48.8167	0.0050312	-16.7654	-16.4468	0.0079326	-47.7631	0.059769	0.52696	0.0077948	NaN	NaN	-20.5188	0.26213	0.31268	0.033866	-31.007	19.6128	29.0861	2.6886	60
	150828_7_C2	krh	8.06	90.5882	600	-3.0598	148.799	-21.5963	1200	61.129	7.5842		PollyPrepLine_1HourPrep.vi	"9/1/2015,23:00:42"	56188	150324_Cracker_PBL	123.95	27.9	12.1	-48.4915	-49.053	0.0049477	-16.8067	-16.4555	0.0062031	-47.9691	0.062049	0.59463	0.0080812	NaN	NaN	-20.559	0.24695	0.35663	0.032586	-21.5004	20.7909	39.5232	2.8504	60
	150902_6_C2	krh	8.994	90.0238	600	-15.9073	75.4555	-21.5064	1200	67.889	7.5483		PollyPrepLine_1HourPrep.vi	"09/06/15,14:25:37"	56505	150324_Cracker_PBL	136.92	30.98	-8.4	-48.3063	-48.8651	0.0047156	-16.929	-16.5498	0.0073932	-47.9382	0.059151	0.56286	0.0082343	NaN	NaN	-20.7783	0.25064	0.38045	0.033533	-45.1651	15.5802	14.4406	2.1369	60
	150903_6_C2	andy	8.185	89.88	600	-19.4322	-2.0214	-21.743	1200	62.898	7.6845		PollyPrepLine_1HourPrep.vi	"09/07/15,07:29:47"	56569	150324_Cracker_PBL	126.24	28.67	11.5	-48.4425	-49.0033	0.0043295	-16.8239	-16.3973	0.0071026	-47.9904	0.062367	0.53661	0.0083067	NaN	NaN	-20.4761	0.22167	0.47615	0.029454	20.842	17.5965	84.4807	2.4129	60
	150903_8_C2	andy	9.235	89.9162	600	-19.8088	-3.6586	-21.7442	1200	70.997	7.6878		PollyPrepLine_1HourPrep.vi	"09/07/15,12:21:40"	56583	150324_Cracker_PBL	142.56	32.18	40.2	-48.5622	-49.1247	0.0040912	-16.8962	-16.4301	0.0073969	-48.1378	0.054797	0.58123	0.0075543	NaN	NaN	-20.6025	0.21552	0.49455	0.028657	-17.0384	14.4431	44.5307	1.981	60
	150922_11_C2A	amh	6.655	90.0669	600	9.0522	14.0202	-21.4468	1200	51.346	7.7154		PollyPrepLine_1HourPrep.vi	"9/24/2015,10:23:57"	57738	150324_Cracker_PBL	102.34	23.2	5.8	-48.2234	-48.781	0.0053499	-17.0353	-16.5505	0.006771	-47.967	0.072036	0.55723	0.0095942	NaN	NaN	-21.0552	0.22726	0.31322	0.029726	-51.6748	16.8785	7.6546	2.315	60
	150923_2_C2A	amh	6.459	90.0591	600	3.5835	9.1105	-21.8697	1200	49.43	7.6529		PollyPrepLine_1HourPrep.vi	"9/24/2015,15:32:50"	57752	150324_Cracker_PBL	99.78	22.77	-21.3	-47.9928	-48.5472	0.0042813	-17.0013	-16.4751	0.0065518	-47.7207	0.062127	0.5451	0.0083607	NaN	NaN	-21.0339	0.24172	0.26481	0.032102	-43.909	22.052	15.5873	3.0235	60
	150925_14_C2A	amh	7	90.2987	600	6.7437	11.4727	-21.7204	1200	55.57	7.9386	forgot to write down sample mass, estimated	PollyPrepLine_1HourPrep.vi	"9/29/2015,3:52:15"	58053	150324_Cracker_PBL	111.25	25.42	0.1	-48.4386	-48.9993	0.0048075	-17.0146	-16.4382	0.0071137	-48.1518	0.050423	0.56146	0.0069933	NaN	NaN	-21.0506	0.28668	0.27688	0.037974	-49.1577	21.6089	10.5161	2.964	60
	150926_2_C2	amh	6.997	90.2965	600	3.2111	7.3011	-21.6256	1200	52.651	7.5248		PollyPrepLine_1HourPrep.vi	"9/29/2015,10:50:52"	58076	150324_Cracker_PBL	106.84	25.17	10.7	-48.4949	-49.0564	0.0051152	-17.0333	-16.4319	0.0063683	-48.2387	0.067716	0.54581	0.0091145	NaN	NaN	-21.1076	0.23822	0.2568	0.031784	-50.1907	16.9156	9.5166	2.3204	60
	151020_1_C2	Erica/Landon	8.967	90.3832	600	-6.7331	25.0169	-21.8981	1200	66.897	7.4604		PollyPrepLine_1HourPrep.vi	"10/21/2015,10:40:47"	59601	150324_Cracker_PBL	135.86	30.72	-6.8	-48.4445	-49.0053	0.0042805	-17.1507	-16.5622	0.006349	-48.3312	0.048064	0.51674	0.0067576	NaN	NaN	-21.2446	0.25504	0.35533	0.033798	25.7117	19.7429	90.3786	2.709	60
	151029_3_C2	andy	8.14	90.2776	600	0.34553	6.1275	-21.9298	1200	60.557	7.4394		PollyPrepLine_1HourPrep.vi	"10/29/2015,18:32:03"	60178	150324_Cracker_PBL	124.04	29.53	-76.3	-48.3228	-48.8819	0.0039584	-17.161	-16.6131	0.0059635	-48.2223	0.053093	0.51758	0.0071598	NaN	NaN	-21.3748	0.24037	0.24254	0.031879	-32.3747	18.5082	28.5289	2.5396	60
	151110_1_C2	Randy	8.188	90.2353	600	-13.2475	30.08	-22.2731	1200	60.78	7.4231	pumped residual	PollyPrepLine_1HourPrep.vi	"11/11/15,01:20:10"	60967	150324_Cracker_PBL	124.48	28.07	10.3	-48.5146	-49.0764	0.004587	-16.9259	-16.4165	0.0060182	-48.1701	0.055723	0.52613	0.0076042	NaN	NaN	-20.6739	0.23088	0.48176	0.030532	64.4556	18.9675	131.126	2.6012	60
	151110_12_C2	Randy	8.593	90.0214	600	-8.2465	1.3176	-21.953	1200	64.528	7.5094	pumped residual	PollyPrepLine_1HourPrep.vi	"11/12/2015,3:03:23"	61045	150324_Cracker_PBL	131.54	29.27	-24.9	-48.436	-48.9967	0.0046112	-16.8083	-16.3707	0.0067202	-47.9181	0.060948	0.59335	0.0084476	NaN	NaN	-20.8396	0.35294	0.073121	0.046178	-56.0498	19.038	2.7699	2.6101	60
	151114_1_C2	randy	8.562	89.8591	600	-7.8193	31.2162	-20.7584	1200	63.011	7.3594		PollyPrepLine_1HourPrep.vi	"11/15/15,22:50:48"	61318	150324_Cracker_PBL	129.07	28.93	17.4	-48.5464	-49.1086	0.0043582	-16.8553	-16.498	0.0068094	-48.1484	0.062549	0.50737	0.0085787	NaN	NaN	-20.5968	0.26453	0.41704	0.034943	62.1141	27.1109	128.514	3.7181	60
	151118_1_C2	randy	8.923	89.9644	600	-10.4599	27.6829	-22.1249	1200	65.74	7.3675	pumped residual	PollyPrepLine_1HourPrep.vi	"11/21/15,08:58:36"	61686	150324_Cracker_PBL	132.95	29.95	4.2	-48.431	-48.9916	0.0040188	-16.7933	-16.4633	0.0068622	-47.9655	0.052377	0.5184	0.0069118	NaN	NaN	-20.5675	0.52281	0.32049	0.068665	41.7861	22.9862	106.644	3.1512	60
	151119_1_C2	randy	9.659	89.9148	600	-8.5964	34.9506	-21.1267	1200	72.153	7.47	pumped residual	PollyPrepLine_1HourPrep.vi	"11/21/2015,20:36:32"	61722	150324_Cracker_PBL	148.38	33.12	5.2	-48.1752	-48.7322	0.018655	-16.7518	-16.47	0.026133	-47.6655	0.11799	0.53061	0.011826	NaN	NaN	-20.4851	2.8782	0.31905	0.37403	75.4791	89.7688	142.019	12.2955	60
ETH1
	150326_1_ETH1	egh	8.409	89.7736	600	-7.8744	18.5094	-21.0795	1200	64.081	7.6205	20 minute acid pump time	PollyPrepLine_1HourPrep.vi	"3/27/2015,18:14:31"	46394	150324_Cracker_PBL	130.74	31.06	-6.4	2.0322	2.1903	0.0052186	-2.4566	-2.3197	0.0075811	15.5214	0.062913	0.21446	0.0079089	NaN	NaN	8.0912	0.3241	0.0086195	0.041456	148.825	26.2828	125.591	3.3245	60	first sample of day included
	150420_1_ETH1	jrk	6.094	89.9836	600	-7.2109	23.9656	-21.4517	1200	34.298	5.6282		PollyPrepLine_1HourPrep.vi	"4/20/2015,20:28:40"	48071	150324_Cracker_PBL	70.85	16.45	18.8	0.286	0.41921	0.0042842	-1.4726	-1.4681	0.0073061	14.7943	0.068368	0.1893	0.0086061	NaN	NaN	10.0362	0.351	-0.025457	0.044317	96.0193	32.6384	73.6174	4.1272	60	first sample of day included
	151028_1_ETH1	andy	9.897	90.0246	600	-6.5684	16.2416	-21.68	1200	71.501	7.2245		PollyPrepLine_1HourPrep.vi	"10/28/15,12:48:12"	60094	150324_Cracker_PBL	146.44	33.03	9.4	2.067	2.2256	0.0049997	-2.8753	-2.5256	0.0068509	15.0963	0.075268	0.18685	0.0097706	NaN	NaN	7.0901	0.30887	-0.14617	0.039718	69.1283	20.9172	48.3445	2.6484	60
	151103_4_ETH1	andy	9.097	90.25	600	-8.7029	1.1663	-21.8712	1200	66.708	7.333		PollyPrepLine_1HourPrep.vi	"11/4/2015,1:25:05"	60538	150324_Cracker_PBL	135.42	30.89	11.3	1.9636	2.1207	0.0044772	-2.8683	-2.5411	0.0069078	15.0131	0.06036	0.19851	0.0075631	NaN	NaN	6.9484	0.24912	-0.30041	0.031756	42.0307	18.3951	21.8639	2.3287	60
ETH2
	150528_1_ETH2	alex	8	89.9582	600	-7.4664	19.6425	-21.7638	1200	59	7.375		PollyPrepLine_1HourPrep.vi	"05/28/15,18:40:01"	50396	150324_Cracker_PBL	118.39	26.79	24	-10.2393	-10.256	0.004452	-18.6368	-18.3405	0.0068754	-13.098	0.059044	0.19393	0.0077072	NaN	NaN	-24.0856	0.26733	0.29667	0.035097	68.3175	31.3441	94.9375	4.1481	60	first sample of day included
	151016_1_ETH2	andy	9.028	88.7996	600	1.6836	201.782	-21.7728	1200	64.967	7.1962	this is PollyPrep_beta_151007 with 3000 T3_Helium_Bake_Time and 1200 T3_HighVac_Bake_Time	PollyPrepLine_1HourPrep.vi	"10/16/15,18:11:29"	59278	150324_Cracker_PBL	131.89	29.87	22.2	-10.2888	-10.3062	0.0040608	-19.3136	-18.6865	0.007032	-13.8418	0.054281	0.18894	0.0070799	NaN	NaN	-25.3799	0.26356	0.34809	0.03515	42.126	19.0899	69.6194	2.5299	60
	151016_2_ETH2	andy	8.344	89.8608	600	4.0894	55.623	-21.9014	1200	62.321	7.469	this is PollyPrep_beta_151007 with 3000 T3_Helium_Bake_Time and 1200 T3_HighVac_Bake_Time	PollyPrepLine_1HourPrep.vi	"10/16/15,20:29:01"	59285	150324_Cracker_PBL	124.13	28.24	-17.2	-10.227	-10.2435	0.0039734	-19.2102	-18.585	0.006921	-13.6908	0.055138	0.1734	0.0071592	NaN	NaN	-25.2929	0.27081	0.22641	0.036056	16.0292	19.327	42.5481	2.5599	60
	151022_1_ETH2	erica/landon	8.196	90.1179	600	-10.611	19.8291	-22.1136	1200	61.527	7.507		PollyPrepLine_1HourPrep.vi	"10/23/2015,9:57:42"	59737	150324_Cracker_PBL	124.3	28.16	-8.7	-10.1061	-10.1209	0.0036678	-19.2343	-18.6267	0.0069896	-13.5872	0.062576	0.18563	0.0082252	NaN	NaN	-25.2398	0.23753	0.32949	0.031726	69.76	18.3696	97.6025	2.4337	60
	151026_1_ETH2	andy	8.137	90.1512	600	-10.2104	21.3235	-20.5686	1200	53.881	6.6217	pulled tube out of liquid nitrogen for a second after sealing, not sure if it was long enough to matter	PollyPrepLine_1HourPrep.vi	"10/27/2015,2:59:21"	59995	150324_Cracker_PBL	114.6	25.42	21	-10.0882	-10.1027	0.0038139	-19.3452	-18.7546	0.0063211	-13.6733	0.07037	0.19623	0.0090897	NaN	NaN	-25.3757	0.24513	0.41589	0.032322	63.0867	20.4385	90.982	2.7081	60
	151026_2_ETH2	andy	8.405	90.1893	600	-5.9061	2.8404	-21.9913	1200	64.089	7.6251		PollyPrepLine_1HourPrep.vi	"10/27/2015,5:24:41"	60002	150324_Cracker_PBL	128.98	29.53	-11.6	-10.0777	-10.0921	0.0039178	-19.1902	-18.6024	0.0072398	-13.5007	0.053325	0.20066	0.0069869	NaN	NaN	-25.1939	0.24232	0.28656	0.032046	6.0264	19.9133	32.0855	2.6374	60
	151026_3_ETH2	andy	8.451	90.2212	600	-5.2024	4.8182	-21.5939	1200	62.212	7.3615		PollyPrepLine_1HourPrep.vi	"10/27/2015,7:45:07"	60009	150324_Cracker_PBL	125.54	28.76	-19.9	-10.0851	-10.0996	0.0038739	-19.3162	-18.7272	0.0069728	-13.6149	0.076359	0.22397	0.0099634	NaN	NaN	-25.4731	0.2899	0.25688	0.038461	-2.8613	20.4176	23.2375	2.7049	60
	151103_2_ETH2	andy	8.072	90.1962	600	-10.8597	0.84679	-22.295	1200	57.861	7.1681		PollyPrepLine_1HourPrep.vi	"11/3/2015,20:45:19"	60524	150324_Cracker_PBL	118.22	26.96	13.7	-10.1049	-10.1197	0.0038635	-19.2613	-18.7018	0.0071591	-13.6122	0.055027	0.18716	0.007152	NaN	NaN	-25.2272	0.24568	0.39735	0.032471	37.3607	19.7011	64.4161	2.6098	60
ETH3
	151029_2_ETH3	andy	8.989	90.1635	600	0.32127	7.7653	-21.8828	1200	61.878	6.8837		PollyPrepLine_1HourPrep.vi	"10/29/2015,16:04:54"	60171	150324_Cracker_PBL	125.36	29.95	3.3	1.7608	1.915	0.00465	-2.4383	-2.1003	0.0081418	15.6173	0.069957	0.57472	0.0087252	NaN	NaN	8.0666	0.3159	-0.051192	0.040279	58.725	23.3742	37.553	2.9568	60
ETH4
	150325_1_ETH4	egh	8.018	90.1206	600	-8.4536	14.8837	-21.1369	1200	60.262	7.5158	20 minute acid pump time	PollyPrepLine_1HourPrep.vi	"3/26/2015,17:04:45"	46323	150324_Cracker_PBL	126.33	29.78	-16.6	-10.1441	-10.1594	0.0040502	-19.1747	-18.7382	0.0062513	-13.3184	0.059038	0.44929	0.0076637	NaN	NaN	-25.0317	0.28461	0.42166	0.037601	58.6184	23.5028	86.0806	3.1131	60	first sample of day included
	150415_1_ETH4	lkb	8.676	89.8764	600	-12.5056	20.6899	-20.2162	1200	52.715	6.076		PollyPrepLine_1HourPrep.vi	"4/15/2015,20:19:47"	47752	150324_Cracker_PBL	107.37	25	-11.6	-10.2437	-10.2605	0.004174	-18.9604	-18.6353	0.006901	-13.1838	0.063549	0.46216	0.0085104	NaN	NaN	-24.8353	0.26016	0.187	0.034454	48.4149	15.7065	75.2511	2.0798	60	first sample of day included
	150527_1_ETH4	andy	6.015	90.0708	600	-11.593	11.9032	-21.9638	1200	44.405	7.3824		PollyPrepLine_1HourPrep.vi	"5/27/2015,13:19:38"	50315	150324_Cracker_PBL	89.64	20.55	-7.2	-10.3287	-10.3467	0.004859	-18.7288	-18.4269	0.0074314	-13.0395	0.058534	0.45148	0.0075819	NaN	NaN	-24.0964	0.23281	0.47336	0.030704	59.3222	28.5268	86.0196	3.7756	60	first sample of day included
	151103_1_ETH4	andy	9.072	89.9933	600	-13.4618	37.4752	-21.3824	1200	64.578	7.1184		PollyPrepLine_1HourPrep.vi	"11/3/2015,18:23:43"	60517	150324_Cracker_PBL	133.57	30.38	-8.3	-10.1552	-10.1707	0.0043001	-19.4196	-18.8575	0.0066144	-13.5938	0.053881	0.43362	0.0069953	NaN	NaN	-25.5084	0.28181	0.43152	0.036974	62.182	23.076	90.2926	3.0577	60
Samples
	150323_2_129A	egh	8.907	90.252	600	-4.9376	84.1886	-21.6872	1200	33.288	3.7373	20 minute acid pump time	PollyPrepLine_1HourPrep.vi	"3/24/2015,12:29:07"	46177	150324_Cracker_PBL	67.24	16.36	-54.6	-5.6445	-5.5958	0.0042422	-5.4494	-5.1445	0.0064222	5.3072	0.071164	0.62867	0.0090171	NaN	NaN	2.1439	0.45044	0.12962	0.057685	23.578	43.0242	16.7361	5.5168	60
	150323_3_129B	egh	8.949	90.2496	600	-4.7875	15.797	-21.762	1200	40.549	4.5311	20 minute acid pump time	PollyPrepLine_1HourPrep.vi	"3/24/2015,15:00:04"	46184	150324_Cracker_PBL	82.23	19.7	1.2	-5.6406	-5.5918	0.0047178	-5.1268	-4.8353	0.0071066	5.6358	0.063687	0.6196	0.008141	NaN	NaN	2.5536	0.28309	-0.10975	0.036213	4.9448	19.9776	-2.4232	2.5603	60
	150323_4_187A	egh	8.356	90.4398	600	-4.1425	11.9911	-21.8226	1200	54.925	6.5731	20 minute acid pump time	PollyPrepLine_1HourPrep.vi	"3/24/2015,17:31:54"	46191	150324_Cracker_PBL	112.57	26.79	9.6	-6.8444	-6.8127	0.0038379	-9.2304	-8.9089	0.0072692	0.25193	0.06103	0.64708	0.0080134	NaN	NaN	-5.5832	0.27138	0.004213	0.035274	2.9762	17.6577	5.0993	2.2847	60
	150323_5_187B	egh	8.192	90.3319	600	-4.4667	9.1336	-21.6664	1200	51.377	6.2716	20 minute acid pump time	PollyPrepLine_1HourPrep.vi	"3/24/2015,19:58:52"	46198	150324_Cracker_PBL	104.19	24.91	-10.2	-6.7438	-6.7107	0.0038607	-9.1439	-8.8303	0.0069347	0.41254	0.056502	0.61899	0.0072258	NaN	NaN	-5.5169	0.3154	-0.10382	0.040852	-11.5979	25.4424	-9.7795	3.2908	60
	150323_6_HB187	egh	8.184	90.0637	600	-5.2222	9.9767	-21.6564	1200	46.215	5.647	20 minute acid pump time	PollyPrepLine_1HourPrep.vi	"3/24/2015,22:25:20"	46205	150324_Cracker_PBL	93.79	22.43	-138	-6.8452	-6.8136	0.004037	-8.232	-7.9362	0.0083176	1.259	0.064744	0.63057	0.0081429	NaN	NaN	-3.5477	0.42614	0.03695	0.054486	10.7068	36.0575	10.8114	4.6544	60
	150323_7_HB81	egh	8.339	89.996	600	-4.636	9.6759	-21.8003	1200	55.67	6.6759	20 minute acid pump time	PollyPrepLine_1HourPrep.vi	"3/25/2015,0:52:53"	46212	150324_Cracker_PBL	116.28	27.13	-39.7	-7.3895	-7.3656	0.0045116	-12.121	-11.7837	0.0069504	-3.2573	0.065003	0.63134	0.0086101	NaN	NaN	-11.2113	0.31236	0.1684	0.04081	4.482	21.6004	13.059	2.8119	60
	150324_7_HB109	egh	8.749	89.9547	600	-6.6803	83.4459	-21.6253	1200	40.285	4.6045	20 minute acid pump time	PollyPrepLine_1HourPrep.vi	"3/26/2015,3:50:45"	46287	150324_Cracker_PBL	85.14	19.78	1.1	-9.5637	-9.5708	0.0044605	-11.1391	-10.8353	0.0071945	-4.3712	0.069189	0.63331	0.0087307	NaN	NaN	-9.4335	0.36209	-0.010051	0.046933	-17.7854	33.0172	-9.1816	4.2994	60
	150324_8_129A	egh	8.884	90.3606	600	-7.2301	84.1935	-21.8615	1200	32.884	3.7015	20 minute acid pump time	PollyPrepLine_1HourPrep.vi	"3/26/2015,6:28:43"	46294	150324_Cracker_PBL	66.79	16.19	-124.9	-5.6349	-5.586	0.0034193	-5.461	-5.2515	0.0084818	5.2829	0.068922	0.62556	0.0085059	NaN	NaN	1.9958	0.39154	0.0049668	0.049476	4.6472	38.2891	-2.0552	4.9091	60
	150325_2_187A	egh	8.335	90.1399	600	-7.4986	12.0906	-21.3047	1200	56.308	6.7556	20 minute acid pump time	PollyPrepLine_1HourPrep.vi	"3/26/2015,19:25:45"	46330	150324_Cracker_PBL	116.98	27.82	-1.7	-6.8256	-6.7937	0.0038123	-9.1967	-8.9297	0.0066348	0.26893	0.057409	0.60891	0.0072253	NaN	NaN	-5.5902	0.26423	-0.070822	0.03436	1.2681	21.7383	3.3002	2.8114	60
	150327_2_129A	egh	9.577	90.0846	600	-7.4417	82.2961	-21.6517	1200	35.167	3.672	20 minute acid pump time	PollyPrepLine_1HourPrep.vi	"3/29/2015,12:46:59"	46517	150324_Cracker_PBL	71.38	17.22	-10.2	-5.7208	-5.6731	0.004642	-5.4055	-5.2367	0.0083029	5.2397	0.073404	0.60867	0.0091435	NaN	NaN	2.1338	0.43893	0.031538	0.055937	20.8652	31.3688	14.03	4.0218	60
	150327_3_129B	egh	9.694	90.09	600	-5.767	16.0532	-21.5215	1200	42.73	4.4079	20 minute acid pump time	PollyPrepLine_1HourPrep.vi	"3/29/2015,15:22:54"	46524	150324_Cracker_PBL	87.26	20.72	1.6	-5.6725	-5.6242	0.0043698	-5.0424	-4.8825	0.0070247	5.6767	0.069055	0.6167	0.0089269	NaN	NaN	2.8093	0.31925	-0.024101	0.041414	20.1141	22.636	12.4963	2.9004	60
	150327_4_187A	egh	8.577	90.0391	600	-2.6257	8.274	-21.5889	1200	57.616	6.7175	20 minute acid pump time	PollyPrepLine_1HourPrep.vi	"3/29/2015,17:46:05"	46531	150324_Cracker_PBL	117.42	27.82	-38.3	-6.8639	-6.8325	0.0038995	-9.0123	-8.7771	0.0062179	0.44643	0.074601	0.63644	0.0095293	NaN	NaN	-5.0059	0.26364	0.14509	0.034054	8.5622	16.8444	10.2729	2.1781	60
	150327_5_187B	egh	8.261	90.1515	600	-2.3749	9.8195	-21.5716	1200	52.636	6.3716	20 minute acid pump time	PollyPrepLine_1HourPrep.vi	"3/29/2015,20:05:33"	46538	150324_Cracker_PBL	106.93	25.42	-19.8	-6.7577	-6.7248	0.0041677	-8.8218	-8.5925	0.0065869	0.73821	0.061961	0.62865	0.0080247	NaN	NaN	-4.6791	0.33957	0.088937	0.044209	11.6837	36.0675	12.902	4.6619	60
	150413_2_HB128	egh	12.362	90.0699	600	-9.9604	366.743	-21.4941	1200	46.82	3.7874		PollyPrepLine_1HourPrep.vi	"4/13/2015,22:17:33"	47619	150324_Cracker_PBL	94.84	22.43	-11	-5.5751	-5.5254	0.0042367	-5.0128	-4.9278	0.0064681	5.8253	0.063718	0.6055	0.0082766	NaN	NaN	2.9005	0.30358	0.0070707	0.039131	24.6282	28.2612	16.8161	3.6204	60
	150413_3_HB162	egh	9.662	90.0567	600	-9.8882	18.2845	-21.5001	1200	52.285	5.4114		PollyPrepLine_1HourPrep.vi	"4/14/2015,0:45:33"	47626	150324_Cracker_PBL	106.22	24.91	-81.2	-8.2675	-8.2561	0.0038738	-7.6138	-7.4846	0.0061611	0.51645	0.073547	0.63808	0.0094378	NaN	NaN	-2.373	0.35077	-0.023407	0.045149	6.2837	30.6128	6.5849	3.9531	60
	150413_4_HB81	egh	8.689	90.0216	600	-10.3387	6.1401	-21.6206	1200	55.641	6.4036		PollyPrepLine_1HourPrep.vi	"4/14/2015,3:16:14"	47633	150324_Cracker_PBL	113.63	26.36	34.4	-7.4596	-7.4367	0.0040457	-11.8539	-11.65	0.006621	-3.0499	0.069946	0.63365	0.0090196	NaN	NaN	-10.66	0.33569	0.18598	0.043773	15.1371	26.9126	23.3252	3.5019	60

## Sheet: 20170328T092044_ARF_Reduced.txt
pollycompile.m - 170115 reduced filename: 20170328T092044_ARF_Reduced.txt
Created from log file: ClumpedSampleLog_Brand.txt
Reference Materials:
	Accepted Values
	Name	d13C VPDB (permil)	d18O VPDB (permil)	D47 ARF (permil)	notes
	NBS19	1.95	-2.2	0.392	d13C and d18O as per CIAAW, D47 from Dennis et al. 2011
	C64	-2.05	-15.54	0.621	d13Cacc and d18Oacc from kiel_refmat_nist on 150223, D47 is from C64_Summary.xlsx on 150130
	Coral	-2.14	-4.5	0.718	d13Cacc and d18Oacc from kiel_refmat_nist on 150223, D47 is from C64_Summary.xlsx on 150130
	Polly CO2 Reference Gas	-10.3	-6.44	0.9
Absolute Reference Frame (ARF)
	Temperature (*C)	n	Slope	Intercept (D47 [EGvsWG]0)	r2	ETF slope	ETF intercept	ETF r2	ARF slope bootstrapped	ARF intercept bootstrapped
	4	7	-0.00035321	0.083447	0.16805	1.0318	0.93351	0.99848	NaN	NaN
	60	7	-0.00035321	-0.13535	0.57002	1.0318	0.93351	0.99848	NaN	NaN
	1000	10	-0.00035321	-0.88594	0.45759	1.0318	0.93351	0.99848	NaN	NaN
Acid Correction Factor: 0
(if you want to use an acid fractionation correction use, acid = 0.082 Defliese_ChemGeol_2015)
D47 to Temperature equation: T_D47_ARF_acid = sqrt((4.17*10^4)./(D47_ARF_acid - 0.139)); Kelson et al. 2016 GCA equation 2, no acid correction
A note about VPDB values below - the columns labeled "vs VPDB (via WG)" are vs our working reference CO2 which was calibrated against NBS19.
The columns labeled "vs VPDB (formal)" are also vs the working reference CO2 but also corrected to current reference frame values of NBS19, LSVEC, and NBS18.
Individual Carbonates
	Sample ID	User	Mass (mg)	Acid temperature (C)	Reaction time (minutes)	Pre reaction Gauge 1 (mTorr)	Post reaction Gauge 1 (mTorr)	Mean GC transfer temperature (C)	Transfer time (minutes)	CO2 Pressure Gauge 2 (mbar)	CO2 yield (mbar/mg)	prep notes	labviewscript	Analysis Date	Starting analysis number	Polly Method	Multiport Pressure (mbar)	Bellows Pressure (mbar)	Pressure Adjust difference (mV)	d13C vs VPDB (via WG) (permil)	d13C vs VPDB (formal) (permil)	d13C stdev	d18O vs (via WG) (permil)	d18O vs VPDB (formal) (permil)	d18O stdev	d47 vs VPDB (via WG) (permil)	d47 stdev	D47 ARF acid (permil)	D47 stderr	D47 ARF acid bootstrapped (permil)	D47 BS unc	d48 vs VPDB (via WG) (permil)	d48 stdev	D48 (permil)	D48 stderr	d49 vs VPDB (via WG) (permil)	d49 stdev	D49 (permil)	D49 stderr	n	comments
NBS19
C64
	161219_1_C64	unknown	NaN	NaN	NaN	NaN	NaN	NaN	NaN	NaN	NaN	unknown	unknown	"12/21/16,08:09:40"	78977	161020_Cracker_PBL	90.87	20.38	-69.3	-2.0333	-2.0047	0.0046819	-16.4318	-15.7147	0.0059935	-2.5675	0.062256	0.53694	0.0066457	NaN	NaN	-19.1755	0.31181	0.79424	0.033447	212.926	21.5769	227.374	2.3016	90
	161219_3_C64	andy	6.004	91.0777	600	1.1386	6.492	-21.9408	660	NaN	NaN		PollyPrepLine_2HourPrep.vi - 161219	"12/21/16,11:14:32"	78984	161020_Cracker_PBL	95.46	21.66	42.2	-1.9909	-1.9617	0.0039293	-16.295	-15.5799	0.0071213	-2.396	0.068154	0.52617	0.0071845	NaN	NaN	-18.9861	0.28861	0.70923	0.030955	80.2565	17.1541	92.7664	1.8292	90
	161222_2_C64	andy	6.115	NaN	600	NaN	NaN	NaN	1200	NaN	NaN	data still not writing	PollyPrepLine_2HourPrep.vi - 161221	"01/02/17,17:52:04"	79433	161020_Cracker_PBL	90.79	20.98	-97.4	-2.1362	-2.1089	0.003436	-16.2604	-15.5458	0.0065088	-2.5066	0.058909	0.52048	0.0063223	NaN	NaN	-19.2645	0.28193	0.35538	0.030657	40.9447	15.8855	53.0767	1.713	88
	161222_3_C64	andy	5.962	90.1586	600	1.8396	15.9243	-22.0012	1200	43.512	7.2982		PollyPrepLine_2HourPrep.vi - 161221	"01/02/17,20:55:39"	79440	161020_Cracker_PBL	88.76	20.47	38.5	-2.1369	-2.1096	0.0042824	-16.2023	-15.4886	0.0075269	-2.4331	0.06112	0.53537	0.0064338	NaN	NaN	-19.0798	0.27432	0.42576	0.029365	44.651	17.0014	56.7024	1.8126	90
	170105_1_C64	landon	6.614	90	600	NaN	NaN	NaN	1200	NaN	NaN	low yield, probably still He from unpumped overnight bakeout. sample info lost and entered manually 170106	PollyPrepLine_2HourPrep.vi - 161221	"01/05/17,22:39:21"	79604	161020_Cracker_PBL	103.66	23.37	-116.6	-2.2139	-2.1877	0.0041905	-16.2478	-15.5332	0.0063901	-2.5569	0.07376	0.53315	0.0075599	NaN	NaN	-18.6797	0.27632	0.92667	0.029716	74.2246	18.5145	86.8037	1.9738	90
	170105_2_C64	landon	7.199	90	600	NaN	NaN	NaN	1200	NaN	NaN	sample info lost and entered manually 170106	PollyPrepLine_2HourPrep.vi - 161221	"01/06/17,01:37:22"	79611	161020_Cracker_PBL	109.93	25	29.7	-2.1137	-2.0861	0.0046537	-16.2352	-15.5205	0.0056952	-2.4505	0.069682	0.52927	0.0073137	NaN	NaN	-19.1916	0.23479	0.37847	0.02522	26.5565	16.2813	38.4433	1.7361	90
	170112_1_C64	cps	14.439	89.2195	600	1.0111	51.4864	-22.0121	1200	110.34	7.6418	split for 17O. Yield is for all CO2. Split@V9. Freeze breakseal side of V9 for D47 (probably a little small). Expand T5 side of V9 into whole volume is 62.367 mBar (a little big for 17O).	PollyPrepLine_2HourPrep.vi - 170104	"01/13/17,00:24:29"	79966	161020_Cracker_PBL	99.87	22.43	-120.5	-1.7278	-1.6951	0.0042064	-16.3756	-15.6698	0.0059788	-2.2394	0.050336	0.50979	0.005328	NaN	NaN	-19.4241	0.26021	0.42495	0.028056	37.5152	14.217	49.4211	1.5243	89
	170118_1_C64	dynamic zijie	6.065	90.2451	600	1.8396	27.2685	-21.6838	1200	44.553	7.3459		PollyPrepLine_2HourPrep.vi - 170104	"01/19/17,02:39:17"	80297	161020_Cracker_PBL	91.05	20.21	-48.3	-2.1047	-2.077	0.0042676	-16.2549	-15.6206	0.006306	-2.4735	0.064012	0.51751	0.0067437	NaN	NaN	-19.1252	0.23021	0.48634	0.024725	53.3458	15.2264	65.5777	1.6237	90
	170129_2_C64	zijie	6.009	89.9605	600	1.4572	6.1096	-21.7958	1200	44.524	7.4096		PollyPrepLine_2HourPrep.vi - 170104	"01/30/17,04:08:48"	80857	161020_Cracker_PBL	90.61	20.29	-38.9	-2.1267	-2.0993	0.0048621	-16.1648	-15.5203	0.0073975	-2.3949	0.055204	0.52491	0.0058448	NaN	NaN	-18.9329	0.24044	0.49941	0.025673	21.6811	13.9238	33.3769	1.4845	90
	170212_5_C64	andy	6.384	89.5936	600	4.4526	190.803	-20.7647	1200	47.48	7.4373	NO BETWEEN SAMPLE BAKE	PollyPrepLine_2HourPrep.vi - 170104	"02/13/17,03:50:15"	81598	161020_Cracker_PBL	95.73	21.92	84	-2.0762	-2.0481	0.0039971	-16.4302	-15.7129	0.006338	-2.5844	0.060381	0.56083	0.0063662	NaN	NaN	-19.4233	0.27882	0.53817	0.030058	10.3369	17.0897	22.4011	1.833	89
	170212_6_C64	andy	6.157	90.3224	600	1.7759	58.7518	-20.3701	1200	43.318	7.0356	NO BETWEEN SAMPLE BAKE	PollyPrepLine_2HourPrep.vi - 170104	"02/13/17,06:56:00"	81605	161020_Cracker_PBL	90.52	20.38	-83.6	-2.0457	-2.0172	0.0044294	-16.3505	-15.6332	0.0063987	-2.5023	0.064237	0.53032	0.0069095	NaN	NaN	-19.3554	0.29755	0.4455	0.032006	11.7208	13.5387	23.6046	1.4438	90
cor
	170104_6_coral	julia	6.849	89.7348	600	2.0946	6.8744	-21.7956	1200	49.086	7.1669		PollyPrepLine_2HourPrep.vi - 161221	"1/5/2017,13:54:36"	79586	161020_Cracker_PBL	101.37	22.94	-48.8	-2.3526	-2.3282	0.0042435	-5.0471	-4.5	0.0056541	8.9174	0.068648	0.61791	0.0072576	NaN	NaN	2.7616	0.26872	-0.077336	0.028142	38.6314	15.8677	27.438	1.6544	90
	170112_2_coral	cps	6.673	91.349	600	1.4572	6.1734	-21.8931	1200	49.272	7.3838		PollyPrepLine_2HourPrep.vi - 170104	"01/13/17,03:22:45"	79973	161020_Cracker_PBL	100.4	22.43	-1.4	-2.3472	-2.3227	0.0046293	-5.319	-4.6134	0.0068464	8.6359	0.055774	0.61089	0.0058157	NaN	NaN	2.3638	0.2599	0.072031	0.027044	58.2126	12.2314	47.375	1.276	90
	170112_3_coral	cps	6.031	90.3613	600	1.7122	9.1687	-21.5396	1200	43.436	7.2021	big residual	PollyPrepLine_2HourPrep.vi - 170104	"01/13/17,06:21:13"	79980	161020_Cracker_PBL	87.96	19.78	-85	-2.3434	-2.3189	0.0043391	-5.2267	-4.4929	0.0061861	8.7479	0.060775	0.6244	0.006471	NaN	NaN	2.4242	0.26294	-0.053082	0.027653	45.6729	13.0254	34.7675	1.3586	90
	170113_2_coral	julia	6.329	90.3763	600	1.7122	6.5558	-21.8146	1200	45.041	7.1166		PollyPrepLine_2HourPrep.vi - 170104	"01/13/17,22:08:07"	80016	161020_Cracker_PBL	94.58	21.24	49.9	-2.322	-2.2972	0.0041797	-5.2583	-4.5485	0.0064631	8.7161	0.067904	0.60362	0.0071255	NaN	NaN	2.3426	0.3025	-0.071195	0.031358	37.3821	16.3714	26.6057	1.7079	90
	170115_5_Coral	zijie	6.125	90.5363	600	1.9034	6.3646	-21.9376	1200	44.386	7.2467		PollyPrepLine_2HourPrep.vi - 170104	"01/16/17,11:41:18"	80158	161020_Cracker_PBL	90.43	20.21	75.8	-2.3359	-2.3113	0.0043321	-5.1882	-4.5346	0.0058409	8.8726	0.05945	0.70389	0.0060595	NaN	NaN	2.5049	0.28404	-0.050112	0.02997	27.4523	16.9293	16.6499	1.7656	90
	170121_4_coral	dynamic lkb	6.687	90.5711	600	1.9034	10.061	-21.7701	1200	48.286	7.2209		PollyPrepLine_2HourPrep.vi - 170104	"01/22/17,01:19:59"	80455	161020_Cracker_PBL	97.93	21.75	4.3	-2.3616	-2.3373	0.0046684	-5.0572	-4.4045	0.0067687	8.9134	0.066034	0.63348	0.0069221	NaN	NaN	2.6643	0.30699	-0.15402	0.032394	31.6541	13.5965	20.5655	1.4178	90
	170130_6_Coral	zijie	6.585	89.1022	600	1.9034	10.5071	-21.9221	1200	47.531	7.2181		PollyPrepLine_2HourPrep.vi - 170104	"1/31/2017,15:19:36"	80936	161020_Cracker_PBL	98.11	21.66	-63.2	-2.3481	-2.3236	0.0046979	-5.0382	-4.4057	0.0071332	8.9314	0.069417	0.61835	0.007287	NaN	NaN	2.7638	0.2192	-0.093066	0.022886	31.7057	13.9997	20.5638	1.4595	90
	170209_2_coral	lkb	6.158	90.3048	600	1.5847	6.7469	-21.7338	1200	42.412	6.8873		PollyPrepLine_2HourPrep.vi - 170104	"2/10/2017,0:46:35"	81435	161020_Cracker_PBL	86.11	18.93	52.6	-2.2166	-2.1904	0.0041509	-5.2211	-4.5814	0.0066614	8.9238	0.078106	0.67123	0.0081696	NaN	NaN	2.3411	0.30523	-0.1479	0.031801	19.6196	15.2359	8.8448	1.589	90
	170308_4_coral	lkb	7.084	90.1381	600	1.521	6.8744	-21.6449	1200	51.464	7.2648		PollyPrepLine_2HourPrep.vi - 170227	03/09/17,02:30:51	82810	161020_Cracker_PBL	105.52	22.94	12.3	-2.3982	-2.3744	0.0040654	-5.1584	-4.5	0.0074705	8.7617	0.06835	0.62157	0.0072328	NaN	NaN	2.3361	0.27742	-0.278	0.028923	19.1816	14.4029	8.4688	1.5022	90
C2
	170108_2_C2	unknown	NaN	NaN	NaN	NaN	NaN	NaN	NaN	NaN	NaN	unknown	unknown	"1/9/2017,17:15:50"	79788	161020_Cracker_PBL	93.52	21.24	64.7	-48.4629	-49.0473	0.0043215	-17.1986	-16.47	0.0080009	-48.3293	0.077279	0.57906	0.0084038	NaN	NaN	-21.115	0.2844	0.58528	0.030552	-5.0524	11.9411	57.8041	1.3383	90
	170112_7_C2	zijie	6.16	90.5402	600	1.5847	1.5847	-21.8576	1200	47.101	7.6463		PollyPrepLine_2HourPrep.vi - 170104	"01/13/17,15:18:38"	80001	161020_Cracker_PBL	96.52	21.49	-30.3	-48.2735	-48.8554	0.0043519	-17.1766	-16.4693	0.0072718	-48.0984	0.067715	0.6068	0.0075338	NaN	NaN	-21.1105	0.25488	0.54436	0.027478	-10.2608	15.5546	52.01	1.7421	90
	170114_4_C2	zijie	6.436	90.5383	600	1.7759	6.6195	-21.9694	1200	47.889	7.4408		PollyPrepLine_2HourPrep.vi - 170104	"01/15/17,09:14:17"	80097	161020_Cracker_PBL	98.72	21.83	5.2	-48.4465	-49.0307	0.0040112	-17.1723	-16.5227	0.0071333	-48.2608	0.067481	0.60799	0.0074039	NaN	NaN	-21.1835	0.28784	0.46171	0.031151	-24.1451	14.4444	37.435	1.6273	89
	170115_2_C2	zijie	6.288	90.9265	600	1.7122	5.8547	-21.8645	1200	46.511	7.3968		PollyPrepLine_2HourPrep.vi - 170104	"01/16/17,02:41:06"	80137	161020_Cracker_PBL	95.11	21.24	0.3	-48.451	-49.0353	0.0049461	-17.189	-16.5612	0.0068535	-48.3229	0.060796	0.56328	0.0067536	NaN	NaN	-21.1732	0.29348	0.50623	0.031815	2.1958	13.4096	65.4747	1.5023	90
	170125_5_C2	lkb	5.638	89.9946	600	1.266	6.5558	-21.7003	1200	41.608	7.3799		PollyPrepLine_2HourPrep.vi - 170104	"1/26/2017,9:39:12"	80678	161020_Cracker_PBL	84.26	19.18	21.4	-48.3925	-48.976	0.0039205	-16.9112	-16.2669	0.0067435	-47.9877	0.061874	0.56903	0.0068116	NaN	NaN	-20.5587	0.247	0.56886	0.02693	2.81	13.8727	65.4604	1.5622	89
	170129_5_C2	zijie	6.407	89.5939	600	1.2023	6.9381	-21.8038	1200	48.017	7.4945		PollyPrepLine_2HourPrep.vi - 170104	"01/30/17,13:35:05"	80878	161020_Cracker_PBL	98.64	21.83	-57.2	-48.4833	-49.068	0.0042679	-17.0415	-16.3962	0.010381	-48.1653	0.059131	0.61072	0.0064629	NaN	NaN	-20.9056	0.27196	0.4799	0.029563	-26.1916	15.3727	35.0249	1.732	89
	170202_3_C2	zijie	6.605	89.5803	600	1.6484	15.4782	-21.8528	1200	50.222	7.6036		PollyPrepLine_2HourPrep.vi - 170104	"02/03/17,03:25:49"	81071	161020_Cracker_PBL	102.52	22.69	-11.6	-48.3709	-48.9541	0.0044927	-17.2576	-16.6189	0.0073316	-48.2472	0.070245	0.63405	0.0076511	NaN	NaN	-21.3845	0.30363	0.42938	0.0327	-33.8492	12.6782	27.2161	1.4205	90
	170205_3_C2	zijie	6.063	90.6352	600	1.4572	6.4283	-21.7972	1200	45.02	7.4254		PollyPrepLine_2HourPrep.vi - 170104	"02/06/17,03:51:40"	81236	161020_Cracker_PBL	91.76	20.29	64.6	-48.1484	-48.7287	0.0046372	-17.1776	-16.4756	0.0057613	-47.9852	0.067836	0.59893	0.0075082	NaN	NaN	-21.2514	0.27255	0.40165	0.029372	-32.556	14.1764	28.182	1.5964	89
	170218_4_C2	zijie	6.158	90.5449	600	1.1386	1.266	-21.831	1200	46.655	7.5763		PollyPrepLine_2HourPrep.vi - 170104	"02/19/17,07:15:52"	81931	161020_Cracker_PBL	95.99	21.32	-19.9	-48.4926	-49.0774	0.004428	-17.1552	-16.4164	0.0069239	-48.2607	0.068702	0.63843	0.0073279	NaN	NaN	-21.1774	0.2299	0.43335	0.02473	-21.386	14.1335	40.3822	1.5831	90
	170312_2_c2	unknown	NaN	NaN	NaN	NaN	NaN	NaN	NaN	NaN	NaN	unknown	unknown	03/13/17,01:39:59	83012	161020_Cracker_PBL	95.64	20.81	-11.4	-48.4397	-49.0238	0.0046437	-17.2278	-16.494	0.0064193	-48.2996	0.058401	0.61789	0.0063964	NaN	NaN	-21.3155	0.34689	0.43972	0.03746	-20.3691	18.2384	41.5586	2.0436	90
	170312_3_c2	zijie	6.138	90.4812	600	1.4572	7.1931	-21.7939	1200	46.646	7.5995		PollyPrepLine_2HourPrep.vi - 170227	3/13/2017,1:39:59	83012	161020_Cracker_PBL	95.64	20.81	-11.4	-48.4397	-49.0238	0.0046437	-17.2278	-16.47	0.0064193	-48.2996	0.058401	0.61789	0.0063964	NaN	NaN	-21.3155	0.34689	0.43972	0.03746	-20.3691	18.2384	41.5586	2.0436	90
ETH1
	170107_4_ETH1	lkb	5.962	89.5926	600	1.0749	6.6195	-21.6998	1200	41.392	6.9426		PollyPrepLine_2HourPrep.vi - 170104	"01/08/17,06:33:20"	79728	161020_Cracker_PBL	84.61	19.27	-55.5	2.0263	2.1085	0.0041104	-2.8244	-2.25	0.0067639	15.0936	0.069501	0.19201	0.0071953	NaN	NaN	7.2682	0.31339	-0.07137	0.032759	65.692	18.3722	44.9107	1.8989	90
	170124_3_ETH1	lkb	6.663	90.5231	600	1.3298	12.2916	-21.7297	1200	41.611	6.2451		PollyPrepLine_2HourPrep.vi - 170104	"01/25/17,03:23:07"	80614	161020_Cracker_PBL	84.7	19.1	-70.8	1.9133	1.994	0.0039399	-2.7153	-2.068	0.0064713	15.1167	0.063637	0.21373	0.0065284	NaN	NaN	7.4437	0.28536	-0.11512	0.030033	44.393	14.2587	23.9181	1.4737	90
	170215_3_ETH1	julia	7.155	90.4245	600	1.9671	7.1293	-21.6967	1200	52.862	7.3881		PollyPrepLine_2HourPrep.vi - 170104	"02/16/17,02:43:07"	81757	161020_Cracker_PBL	108.69	24.65	-74.3	2.0523	2.1349	0.0040143	-2.8686	-2.2381	0.0068317	15.0537	0.065332	0.17196	0.006671	NaN	NaN	7.0217	0.29714	-0.2275	0.031147	34.3851	15.4664	14.2762	1.5985	90
	170207_2_ETH1	zijie	6.074	90.5943	600	1.4572	6.4283	-21.1327	1200	44.113	7.2626		PollyPrepLine_2HourPrep.vi - 170104	"02/07/17,23:35:32"	81326	161020_Cracker_PBL	89.2	19.61	-68.1	2.0705	2.1533	0.0039869	-2.9619	-2.3289	0.0064179	15.0737	0.065426	0.27211	0.0067375	NaN	NaN	6.7786	0.29178	-0.28214	0.030358	44.2761	18.1113	24.1481	1.8723	90
ETH2
	170126_5_ETH2	lkb	6.731	90.171	600	1.3935	164.163	-21.8273	1200	48.049	7.1385		PollyPrepLine_2HourPrep.vi - 170104	"01/27/17,11:27:38"	80728	161020_Cracker_PBL	97.49	21.92	-144.8	-10.1634	-10.2421	0.0041155	-19.2127	-18.5676	0.0075988	-13.5257	0.066343	0.29582	0.0069429	NaN	NaN	-25.1023	0.26856	0.42669	0.028941	-1.6415	20.2107	24.3544	2.1853	90
	170206_2_ETH2	krh	7.116	90.5021	600	1.4572	11.3356	-21.2439	1200	49.355	6.9358		PollyPrepLine_2HourPrep.vi - 170104	"2/6/2017,22:50:54"	81279	161020_Cracker_PBL	100.14	22.18	88.3	-9.8862	-9.9613	0.0036926	-19.2524	-18.5354	0.0063604	-13.2713	0.063635	0.32402	0.0066767	NaN	NaN	-25.1458	0.32038	0.46176	0.034523	4.5106	18.3001	30.4605	1.9789	90
	170219_3_ETH2	zijie	6.2	90.7963	600	1.3935	6.9381	-20.4065	1200	46.667	7.5269		PollyPrepLine_2HourPrep.vi - 170104	"02/20/17,04:59:49"	81979	161020_Cracker_PBL	95.64	21.24	-55.3	-10.1253	-10.2035	0.003816	-19.2412	-18.4878	0.0068197	-13.4296	0.06271	0.38828	0.0066521	NaN	NaN	-25.0179	0.26302	0.57132	0.028308	2.4024	15.8236	28.5239	1.7208	89
	170313_2_ETH2	zijie	6.295	90.2519	600	1.0111	6.5558	-21.7682	1200	39.281	6.24		PollyPrepLine_2HourPrep.vi - 170227	03/14/17,01:01:10	83064	161020_Cracker_PBL	80.11	17.56	-19.1	-10.1869	-10.2659	0.0039119	-19.3052	-18.5303	0.0068271	-13.573	0.056661	0.36899	0.0059343	NaN	NaN	-25.1815	0.25848	0.53416	0.027823	2.8357	10.8245	29.1671	1.1708	90
ETH3
	170103_7_ETH3	julia	7.947	89.3416	600	1.8396	32.7494	-21.7481	1200	51.011	6.4189	lifter A raised three quarters up	PollyPrepLine_2HourPrep.vi - 161221	"1/4/2017,19:10:32"	79543	161020_Cracker_PBL	108.43	24.14	-20.8	1.5862	1.6626	0.0042579	-2.3253	-1.8189	0.0071915	15.5763	0.068466	0.59844	0.0068836	NaN	NaN	8.3068	0.2837	-0.038382	0.02943	52.2564	13.3556	31.1608	1.3795	90
	170119_4_ETH3	dynamic lkb	9.895	90.4712	600	1.2023	7.0656	-21.6688	1200	45.827	4.6313		PollyPrepLine_2HourPrep.vi - 170104	"01/20/17,05:00:52"	80355	161020_Cracker_PBL	90.96	20.29	-14.5	1.6886	1.7664	0.0041421	-2.37	-1.7131	0.006408	15.6622	0.065868	0.63018	0.0070297	NaN	NaN	8.1703	0.28459	-0.084762	0.029786	31.4687	15.1934	10.7754	1.5781	89
	170208_5_ETH3	krh	6.079	89.5139	600	1.9034	6.7469	-21.7806	1200	39.388	6.4794		PollyPrepLine_2HourPrep.vi - 170104	"2/9/2017,8:04:31"	81399	161020_Cracker_PBL	80.29	17.65	-86.3	1.7806	1.8596	0.0047836	-2.5851	-1.9613	0.0068604	15.5283	0.063253	0.6281	0.0065997	NaN	NaN	7.5759	0.2799	-0.24411	0.028838	26.7601	14.623	6.5017	1.5108	90
	170306_3_ETH3	andy	6.856	90.1534	600	1.9671	105.148	-21.8494	1200	48.68	7.1004		PollyPrepLine_2HourPrep.vi - 170227	03/06/17,23:20:06	82702	161020_Cracker_PBL	99.52	21.66	85.4	1.5918	1.6683	0.0046474	-2.5503	-1.9128	0.0057578	15.4127	0.063324	0.66281	0.006545	NaN	NaN	7.7711	0.29534	-0.11926	0.030859	41.9145	18.2005	21.48	1.8807	90
	170307_3_ETH3	lkb	6.822	89.8089	600	1.4572	5.791	-21.4819	1200	32.182	4.7174	low yield	PollyPrepLine_2HourPrep.vi - 170227	03/08/17,01:06:30	82759	161020_Cracker_PBL	65.38	14.48	5.6	1.5565	1.6325	0.0039637	-2.5482	-1.9086	0.0064645	15.3269	0.066168	0.60867	0.0068771	NaN	NaN	7.8589	0.2746	-0.036134	0.028737	48.1698	15.5423	27.6451	1.6064	90
ETH4
	170106_3_ETH4	julia	6.209	90.2285	600	1.9671	6.1096	-21.6909	1200	45.873	7.3881		PollyPrepLine_2HourPrep.vi - 170104	"01/07/17,04:46:31"	79671	161020_Cracker_PBL	94.67	21.49	4.8	-10.183	-10.262	0.0040329	-19.4107	-18.654	0.0066046	-13.6125	0.071083	0.43628	0.0074407	NaN	NaN	-25.4916	0.27464	0.43094	0.029845	16.1995	16.2073	43.1022	1.7535	90
	170123_3_ETH4	lkb	6.038	90.0394	600	4.8987	6.8744	-21.7819	1200	42.988	7.1196		PollyPrepLine_2HourPrep.vi - 170104	"1/23/2017,22:31:16"	80556	161020_Cracker_PBL	87.61	19.7	-59.3	-10.0915	-10.1693	0.004173	-19.0462	-18.4081	0.0072031	-13.1354	0.063312	0.45347	0.0067685	NaN	NaN	-24.5415	0.24721	0.66259	0.026766	39.4602	17.5791	66.0887	1.9005	90
	170210_1_ETH4	krh	6.149	90.2939	600	1.0749	25.1016	-21.7437	1200	42.99	6.9914		PollyPrepLine_2HourPrep.vi - 170104	"02/10/17,18:55:08"	81471	161020_Cracker_PBL	87.7	19.35	-18.7	-10.0834	-10.1611	0.0039912	-19.4748	-18.7464	0.0061971	-13.5857	0.067112	0.43218	0.0072461	NaN	NaN	-25.3816	0.26723	0.67398	0.028811	45.9844	16.0811	73.7083	1.74	90
	170213_5_ETH4	lkb	7.689	91.2143	600	1.1386	6.1096	-20.6271	1200	57.938	7.5352		PollyPrepLine_170212_Beta.vi - 170212	"2/14/2017,5:05:18"	81655	161020_Cracker_PBL	117.78	26.96	114.2	-10.0989	-10.1768	0.0040709	-19.4774	-18.7365	0.0075062	-13.5906	0.064037	0.44551	0.0070537	NaN	NaN	-25.5369	0.26877	0.51999	0.029475	-1.7027	19.1849	24.7773	2.0878	89
	170309_5_ETH4	lkb	6.888	90.5692	600	1.6484	6.4283	-21.8186	1200	49.515	7.1886		PollyPrepLine_2HourPrep.vi - 170227	03/10/17,08:26:49	82867	161020_Cracker_PBL	101.64	22.18	62.9	-10.1958	-10.2749	0.0047238	-19.4622	-18.686	0.0073456	-13.671	0.058062	0.44317	0.0063189	NaN	NaN	-25.4876	0.28594	0.53994	0.031007	-5.106	13.9713	21.3523	1.5121	90
Samples
	170308_3_HB_18	lkb	7.714	90.3021	600	1.7759	9.9972	-21.7021	1200	39.539	5.1256		PollyPrepLine_2HourPrep.vi - 170227	03/08/17,23:26:52	82803	161020_Cracker_PBL	81	17.82	-87.5	-6.5356	-6.5664	0.003947	-5.8811	-5.2183	0.0069286	3.9756	0.08447	0.62727	0.0086371	NaN	NaN	1.1582	0.31001	0.016907	0.032418	22.3162	18.2014	17.2801	1.909	90
	170309_1_HB_47	lkb	7.053	89.5726	600	1.266	46.7065	-21.7724	1200	36.522	5.1782	low yield	PollyPrepLine_2HourPrep.vi - 170227	03/09/17,20:25:52	82839	161020_Cracker_PBL	74.56	16.36	18.9	-5.7638	-5.7844	0.004133	-5.494	-4.8328	0.0067031	5.0597	0.064415	0.5655	0.0067434	NaN	NaN	1.9623	0.33248	0.038376	0.034747	69.5805	22.3538	62.6554	2.3409	90
	170309_2_HB_109	lkb	7.712	90.4312	600	1.3298	109.291	-21.4679	1200	33.658	4.3644	low yield	PollyPrepLine_2HourPrep.vi - 170227	03/09/17,23:27:39	82846	161020_Cracker_PBL	68.47	15.08	31.5	-9.4663	-9.5358	0.0039893	-11.3531	-10.6437	0.0056403	-4.5015	0.059416	0.62739	0.0064131	NaN	NaN	-9.4422	0.25596	0.41313	0.027471	24.5706	13.2981	33.8909	1.4223	89
